# Supplementary material for: Bacterial meningitis in the early postnatal mouse studied at single-cell resolution
Source: eLife. 2023 Jun 15;12:e86130. doi: 10.7554/eLife.86130 (PMC10270687; doi:10.7554/eLife.86130)
Supplement: Supplementary file 3. — FC, fold change. [file elife-86130-supp3.xlsx]

## Sheet: Whole meninges dataset
gene	log2(average expression control + 1)	log2(average expression infected + 1)	avg_log2FC	p_val	p_val_adj	sex difference
Tsix	3.03794	0.783514	-2.25443	0	0
Xist	5.72959	3.78828	-1.94132	0	0
Col14a1	2.3106	0.604495	-1.7061	0	0
Slc4a10	2.85816	1.31394	-1.54422	0	0
Ptn	4.40899	2.88358	-1.52541	0	0
Cdh18	2.27102	0.784604	-1.48642	0	0
Slc9a9	2.84689	1.38423	-1.46266	3.4597e-182	7.87428e-178
Rbfox1	3.75829	2.29834	-1.45995	5.06911e-244	1.15373e-239
Adamts12	2.82298	1.37524	-1.44774	0	0
Rab30	1.89597	0.450285	-1.44568	0	0
Mmp16	3.06816	1.64094	-1.42722	0	0
Prdm6	2.86313	1.44972	-1.41341	0	0
Nr3c2	2.38438	0.979813	-1.40457	0	0
Frmpd4	2.59781	1.24667	-1.35114	0	0
Slc24a3	3.50337	2.15733	-1.34604	0	0
Gulp1	3.15416	1.86414	-1.29002	0	0
Mef2c	2.67764	1.38835	-1.2893	0	0
Foxp2	4.18343	2.90305	-1.28038	0	0
Unc5c	3.30106	2.04981	-1.25126	0	0
Unc13c	1.4837	0.240812	-1.24289	0	0
Col8a1	2.03121	0.79622	-1.23499	0	0
Hmcn1	2.6998	1.49676	-1.20304	0	0
Col1a1	4.04308	2.85243	-1.19065	0	0
Gxylt2	1.94935	0.761754	-1.18759	0	0
Mpped2	2.54818	1.37013	-1.17804	0	0
Pdzrn4	2.53137	1.35905	-1.17232	1.86085e-134	4.23529e-130
Itgbl1	2.46032	1.29313	-1.16718	0	0
Airn	3.87255	2.72012	-1.15243	0	0
Epha3	1.88191	0.739595	-1.14232	0	0
Slc6a6	2.29177	1.16066	-1.13111	0	0
Col26a1	2.06081	0.94103	-1.11978	0	0
Tbc1d4	1.73997	0.625359	-1.11461	0	0
Gm48742	1.92684	0.818028	-1.10881	0	0
Dock6	1.99333	0.888991	-1.10434	0	0
Fhod3	1.40652	0.312021	-1.0945	0	0
Plagl1	1.83892	0.746548	-1.09238	0	0
Gnas	3.92523	2.83407	-1.09116	0	0
Cdh11	3.69182	2.60543	-1.08639	0	0
Col1a2	4.45968	3.37643	-1.08325	0	0
Fat3	1.8529	0.77364	-1.07926	1.49282e-96	3.39766e-92
Spats2l	1.63738	0.55839	-1.07899	0	0
Zfp536	2.06203	0.997443	-1.06459	0	0
Hlf	2.07231	1.01015	-1.06215	0	0
Pcdh7	3.39558	2.33451	-1.06107	1.81583e-197	4.13282e-193
Igf2r	1.82257	0.765946	-1.05663	0	0
Auts2	5.22721	4.18834	-1.03886	0	0
Zeb1	3.36539	2.33747	-1.02791	0	0
Mfap4	1.81599	0.797219	-1.01878	0	0
Igsf8	1.86184	0.84455	-1.01729	0	0
Samd4	2.47107	1.46413	-1.00694	0	0
Tmtc4	2.20329	1.19683	-1.00646	0	0
Lrp1	1.85337	2.85555	1.00218	0	0
Cblb	1.26366	2.27537	1.01171	1.70567e-280	3.8821e-276
Gng12	1.36678	2.38383	1.01705	0	0
Cebpb	0.329959	1.34763	1.01767	0	0
Mbd1	0.651277	1.6799	1.02862	2.48782e-125	5.66227e-121
March1	0.652237	1.68105	1.02882	1.01939e-81	2.32014e-77
Il4ra	0.267259	1.29923	1.03197	0	0
Hk2	0.592729	1.62659	1.03386	2.39698e-291	5.45552e-287
Etv6	2.16386	3.19843	1.03457	0	0
Eif2s3y	0.000625448	1.03934	1.03872	0	0
Ngf	0.321578	1.36356	1.04198	6.20652e-213	1.41261e-208
Gm29554	0.202134	1.24436	1.04223	0	0
Srgn	0.541131	1.58408	1.04295	2.08746e-277	4.75107e-273
Pde7b	2.99483	4.04078	1.04595	0	0
Neat1	2.21229	3.26959	1.0573	0	0
Errfi1	1.76858	2.8266	1.05802	0	0
Galnt18	0.722473	1.78226	1.05979	1.15781e-135	2.63518e-131
Serpine2	1.22047	2.29363	1.07316	1.98173e-224	4.51042e-220
Hif1a	0.8737	1.94707	1.07337	1.16788e-283	2.65809e-279
Fstl1	2.79368	3.87169	1.078	0	0
Glis3	1.25624	2.34261	1.08637	2.02995e-264	4.62016e-260
Gm17268	1.0616	2.15348	1.09188	6.60348e-238	1.50295e-233
Gfap	0.509778	1.60466	1.09489	1.42726e-220	3.24844e-216
Xdh	0.0790673	1.17543	1.09636	0	0
Cd38	0.242371	1.33931	1.09694	2.03154e-187	4.62378e-183
Npas2	0.674911	1.77774	1.10283	0	0
Pld1	1.3925	2.49587	1.10337	2.35773e-164	5.3662e-160
Ptpn2	0.814008	1.92228	1.10828	0	0
Socs3	0.326201	1.43587	1.10967	0	0
Gpcpd1	1.74321	2.86759	1.12437	1.04072e-210	2.36868e-206
Lox	0.641688	1.78218	1.14049	0	0
Cyp7b1	1.01103	2.15801	1.14698	1.14933e-159	2.61587e-155
Ampd3	0.442703	1.59076	1.14805	0	0
Tgfbr3	2.71848	3.86875	1.15027	0	0
Smoc2	0.712004	1.86643	1.15443	0	0
Chst11	1.17168	2.32722	1.15555	0	0
Cfh	2.59543	3.76229	1.16686	0	0
Il6st	1.35898	2.52676	1.16779	0	0
Mmp13	0.776204	1.95158	1.17537	1.72631e-263	3.92907e-259
Rnd1	0.0284191	1.20783	1.17941	0	0
Bcl3	0.132703	1.3154	1.18269	0	0
Rnf125	0.093242	1.28726	1.19401	0	0
Tmem100	0.57487	1.77182	1.19694	0	0
Camk4	0.485611	1.6893	1.20369	5.65415e-161	1.28688e-156
Igfbp3	0.404466	1.60972	1.20526	0	0
Fgf7	0.312583	1.53313	1.22054	0	0
Casp4	0.207195	1.43341	1.22621	0	0
Slc1a2	0.668389	1.89715	1.22876	5.70717e-183	1.29895e-178
Abi1	1.47065	2.7064	1.23575	0	0
Nfkb1	1.51855	2.75618	1.23763	0	0
Pappa2	0.187232	1.42808	1.24085	4.86266e-218	1.10674e-213
Relb	0.433316	1.67893	1.24561	0	0
Fbln1	1.01796	2.27316	1.2552	0	0
Kif21a	0.494663	1.75478	1.26012	0	0
Tnip1	0.343433	1.60853	1.26509	0	0
Cyyr1	0.951801	2.22456	1.27276	0	0
Sdc4	0.431645	1.7151	1.28346	0	0
Irak3	0.151405	1.43827	1.28687	0	0
Xbp1	0.562131	1.84979	1.28766	0	0
Ism1	0.288396	1.59384	1.30544	0	0
Stat3	1.42508	2.7307	1.30562	0	0
Gm26917	2.00955	3.33035	1.3208	0	0
4930578G10Rik	0.0597845	1.38101	1.32123	0	0
Ifitm3	0.793357	2.13491	1.34155	0	0
Prmt8	0.697746	2.07994	1.38219	0	0
Scara5	0.187467	1.57631	1.38884	0	0
Serpina3n	0.00209773	1.39387	1.39177	0	0
Alk	0.635169	2.02728	1.39211	1.38405e-262	3.15009e-258
Hdac9	2.11881	3.53008	1.41127	0	0
Ctps	0.458228	1.8816	1.42337	0	0
Aoah	0.978344	2.41098	1.43264	1.40457e-52	3.1968e-48
Ifitm1	0.284339	1.76095	1.47661	0	0
Esyt2	1.47617	2.95451	1.47834	0	0
Fmnl2	2.82796	4.32384	1.49588	0	0
Pde4d	3.21193	4.71877	1.50684	0	0
Ier3	0.960738	2.46829	1.50755	0	0
Timp1	0.235203	1.79125	1.55605	0	0
Cebpd	0.486291	2.0555	1.56921	0	0
Pdgfra	1.35041	2.92003	1.56962	0	0
Uty	0.0197611	1.60741	1.58765	0	0
Nrg3	1.1763	2.7664	1.59009	0	0
Susd6	1.97181	3.56892	1.59711	0	0
Il6	0.0161685	1.63379	1.61762	0	0
Icam1	0.371165	2.01749	1.64632	0	0
Pappa	0.72101	2.38213	1.66112	0	0
Gpm6b	1.32225	2.98776	1.66552	0	0
Steap4	0.148307	1.81968	1.67137	0	0
Birc3	0.409811	2.08875	1.67894	0	0
Osmr	0.383902	2.06391	1.68001	0	0
Cyp1b1	0.736797	2.43933	1.70253	0	0
Pde4b	1.31557	3.02629	1.71072	0	0
Cpne8	0.803792	2.54358	1.73979	0	0
Aspg	0.170267	1.91104	1.74077	0	0
Gm20400	0.276003	2.03697	1.76097	0	0
Sod2	0.224982	2.13965	1.91467	0	0
Nfkbia	0.351749	2.2776	1.92586	0	0
Fkbp5	0.85818	2.80133	1.94315	0	0
Serping1	0.901486	2.88671	1.98522	0	0
Sbno2	0.684752	2.67467	1.98992	0	0
Cacna1d	1.22897	3.24672	2.01775	0	0
Spidr	0.92741	2.94975	2.02234	0	0
Ap4e1	0.691569	2.81378	2.12221	0	0
Cxcl2	0.0243992	2.17111	2.14671	0	0
Zbtb16	0.324106	2.48599	2.16189	0	0
Olfr1033	0.655548	2.91645	2.2609	0	0
Slc39a14	0.925458	3.1939	2.26845	0	0
Prg4	0.0726934	2.37477	2.30208	0	0
Cxcl1	0.00772843	2.33793	2.3302	0	0
Pde10a	0.923487	3.32966	2.40617	0	0
Fth1	1.73996	4.15885	2.41888	0	0
Csf3	0.000437082	2.48908	2.48864	0	0
Lbp	0.416158	2.99182	2.57567	0	0
Il1r1	0.433436	3.29775	2.86431	0	0
Cp	1.84587	4.82728	2.98141	0	0
Kiz	0.67903	3.77291	3.09388	0	0
Lcn2	0.0125181	3.39771	3.38519	0	0
Ttr	0.161667	3.55032	3.38866	0	0
Apod	1.64544	5.11939	3.47395	0	0
Mt2	0.131788	3.60891	3.47712	0	0
Saa3	0.0107347	4.15325	4.14251	0	0
Mt1	0.633552	4.81192	4.17837	0	0

## Sheet: Arachnoid barrier
gene	log2(average expression control + 1)	log2(average expression infected + 1)	avg_log2FC	p_val	p_val_adj
Itgbl1	4.33559	1.58277	-2.75283	1.78996e-151	4.07396e-147
Nr3c2	4.56041	2.1504	-2.41001	3.5148e-144	7.99967e-140
Unc13c	2.53877	0.284079	-2.25469	2.52804e-141	5.75381e-137
Col23a1	3.95106	1.7956	-2.15546	6.22123e-109	1.41595e-104
Slc4a4	4.64592	2.50462	-2.1413	2.35261e-128	5.35454e-124
Tsix	2.76423	0.673027	-2.09121	1.50751e-158	3.4311e-154
Unc5c	3.85263	1.84935	-2.00328	9.27898e-109	2.1119e-104
Ust	3.94613	1.97654	-1.96959	6.0964e-118	1.38754e-113
Col25a1	4.40864	2.45953	-1.9491	5.5998e-82	1.27451e-77
Gm6260	4.47943	2.60132	-1.8781	2.87974e-80	6.55429e-76
Adamts12	2.39782	0.540317	-1.8575	2.3966e-119	5.45466e-115
Cdh1	3.50222	1.64721	-1.855	4.01148e-103	9.13013e-99
Cubn	2.46889	0.620124	-1.84876	7.41349e-119	1.68731e-114
Slc24a3	3.79748	1.98418	-1.8133	6.57268e-76	1.49594e-71
Slc16a1	2.56203	0.796781	-1.76525	2.78993e-88	6.34989e-84
Xist	5.35819	3.67074	-1.68746	3.47566e-111	7.91061e-107
Nckap5	2.41626	0.74316	-1.6731	7.19614e-78	1.63784e-73
Hmcn1	2.65228	0.996612	-1.65567	2.15515e-57	4.90513e-53
A230057D06Rik	2.95291	1.3313	-1.62161	1.43788e-77	3.27261e-73
Arhgap42	2.65759	1.12229	-1.5353	6.65246e-83	1.5141e-78
Ptn	3.82593	2.29251	-1.53342	2.39578e-85	5.4528e-81
Gm14061	1.82196	0.362955	-1.459	5.97184e-50	1.35919e-45
Samd4	2.84239	1.38839	-1.454	1.46144e-70	3.32623e-66
Nrp2	2.54544	1.11087	-1.43458	1.26326e-69	2.87518e-65
Slit2	2.72487	1.30815	-1.41672	6.55052e-38	1.4909e-33
Btg2	2.41422	0.997852	-1.41637	7.3597e-65	1.67507e-60
Trp53i11	1.90714	0.50431	-1.40283	4.57065e-71	1.04028e-66
Ablim1	2.69796	1.29904	-1.39892	4.70487e-66	1.07083e-61
Slc4a10	2.0401	0.656759	-1.38334	5.3977e-26	1.22852e-21
Mob3b	2.69273	1.31621	-1.37652	5.84181e-69	1.3296e-64
Klf4	2.12098	0.757882	-1.3631	2.23339e-76	5.0832e-72
Hes1	2.30186	0.956578	-1.34528	1.03241e-65	2.34978e-61
Bmp4	2.59622	1.25886	-1.33736	2.5606e-68	5.82793e-64
Aifm3	1.76294	0.428509	-1.33443	1.16335e-76	2.64778e-72
Reps2	3.29144	1.96054	-1.3309	6.40916e-71	1.45873e-66
Hlf	2.83413	1.50434	-1.32979	2.38902e-54	5.43741e-50
Grb10	3.15953	1.83038	-1.32915	6.34216e-61	1.44347e-56
Mpped2	3.20431	1.89067	-1.31364	1.6012e-68	3.64432e-64
Bnc2	5.79365	4.48855	-1.3051	1.81577e-114	4.13269e-110
Sgcd	2.98423	1.6853	-1.29893	9.78366e-64	2.22676e-59
Itgb4	2.10276	0.837799	-1.26496	1.27127e-55	2.8934e-51
Rab30	1.63717	0.37455	-1.26262	7.93395e-85	1.80577e-80
Fn1	4.49929	3.24752	-1.25177	3.8695e-58	8.80698e-54
Ptprd	3.20881	1.97592	-1.23289	3.98111e-60	9.06101e-56
Mpp6	2.55113	1.32812	-1.223	1.63332e-63	3.71743e-59
Dlg2	2.02814	0.815003	-1.21314	1.92223e-32	4.37499e-28
Adam12	4.33511	3.13128	-1.20382	2.45445e-71	5.58633e-67
Ogt	2.8527	1.68002	-1.17268	8.60427e-66	1.95833e-61
Efemp1	1.97551	0.807657	-1.16785	1.01398e-62	2.30782e-58
Srgap2	3.21935	2.07397	-1.14538	8.51702e-62	1.93847e-57
Nalcn	2.2431	1.12285	-1.12025	1.32369e-53	3.01272e-49
Alcam	6.23415	5.11875	-1.11541	3.05463e-78	6.95234e-74
Zbtb7c	2.33329	1.21801	-1.11528	2.83614e-51	6.45506e-47
Ptpn14	2.74169	1.63041	-1.11128	1.59791e-54	3.63683e-50
Adra1b	1.47638	0.366545	-1.10984	1.70917e-61	3.89006e-57
Slc38a2	4.71009	3.60163	-1.10846	3.34822e-56	7.62055e-52
Jun	1.8857	0.780565	-1.10514	2.78066e-45	6.32878e-41
Gm5089	1.80803	0.707335	-1.1007	1.50454e-53	3.42433e-49
Gab1	2.61826	1.5233	-1.09496	1.85456e-45	4.22099e-41
Tcte2	2.31552	1.22384	-1.09168	8.47452e-51	1.9288e-46
Sept6	1.4462	0.356032	-1.09017	1.18011e-70	2.68593e-66
Plekhg3	1.72624	0.642887	-1.08335	1.35509e-65	3.08418e-61
Sik1	2.1309	1.05001	-1.08089	4.43988e-52	1.01052e-47
Plcd3	1.56286	0.482992	-1.07987	2.86399e-60	6.51843e-56
Ldlrad3	2.90619	1.83725	-1.06894	1.07452e-52	2.4456e-48
Hs6st2	1.44373	0.383519	-1.06021	1.60092e-36	3.6437e-32
Wls	3.08679	2.02843	-1.05836	9.89917e-54	2.25305e-49
Aff3	3.17999	2.12332	-1.05667	2.33556e-53	5.31574e-49
Sned1	3.66211	2.63133	-1.03078	2.68063e-50	6.1011e-46
Ttc3	2.17372	1.14565	-1.02807	9.66189e-56	2.19905e-51
St3gal4	1.58755	0.559927	-1.02763	3.92336e-51	8.92956e-47
Rassf8	2.37491	1.34894	-1.02597	7.69823e-54	1.75212e-49
Tmod3	2.63305	1.60958	-1.02346	1.40336e-41	3.19406e-37
Ndrg1	2.28277	1.26068	-1.02209	3.55242e-43	8.0853e-39
Lama2	2.42687	1.40498	-1.02188	1.09448e-40	2.49103e-36
Gpc3	3.25665	2.23711	-1.01954	5.94705e-43	1.35355e-38
Adcy5	1.55707	0.541522	-1.01555	2.79359e-52	6.35822e-48
Slc26a7	1.14773	0.135045	-1.01268	2.01049e-54	4.57588e-50
Tmtc4	2.44062	1.43578	-1.00484	1.1222e-34	2.55414e-30
Gsdme	2.65065	1.64922	-1.00143	9.82791e-44	2.23683e-39
Eif2s3y	0	0.938048	0.938048	2.15389e-21	4.90225e-17
Ddx3y	0	0.97575	0.97575	1.24375e-22	2.83078e-18
Ppm1h	1.05209	2.06068	1.00859	5.47286e-11	1.24562e-06
Acat3	0.0286363	1.03874	1.01011	2.68848e-22	6.11897e-18
Igfbp3	0.797395	1.81139	1.014	7.27639e-16	1.65611e-11
Il6st	1.27498	2.29179	1.0168	1.25455e-16	2.85536e-12
Isyna1	1.34181	2.36336	1.02155	2.20377e-14	5.01579e-10
Fkbp5	1.99278	3.01597	1.02319	3.65294e-31	8.31408e-27
Map4k3	1.30638	2.34029	1.03391	7.06905e-17	1.60892e-12
Lox	0.830522	1.86703	1.03651	3.72333e-17	8.4743e-13
Man1a	0.812769	1.85845	1.04568	1.73511e-17	3.94911e-13
Pde4d	2.43065	3.48248	1.05183	2.60398e-14	5.92665e-10
Wbp1l	1.07495	2.13624	1.06129	2.67964e-21	6.09886e-17
Hivep2	1.59222	2.6541	1.06189	1.93331e-24	4.40021e-20
Per2	0.56481	1.6386	1.07378	2.72739e-18	6.20754e-14
C1s1	0.0300256	1.10711	1.07708	2.31512e-24	5.26922e-20
Rnd1	0.00596301	1.08943	1.08347	9.3591e-22	2.13013e-17
Serpina3n	0	1.08501	1.08501	7.31367e-26	1.66459e-21
Raph1	1.17715	2.26754	1.0904	7.40637e-17	1.68569e-12
Plscr1	0.341829	1.43399	1.09216	4.14822e-19	9.44135e-15
Ror1	2.86353	3.95736	1.09384	3.12037e-39	7.10197e-35
Rpap3	0.333274	1.44168	1.10841	7.47388e-22	1.70106e-17
Ctps	0.551713	1.66707	1.11536	3.19212e-23	7.26526e-19
Slc16a6	1.81509	2.95659	1.1415	4.24202e-26	9.65483e-22
Sugct	0.542582	1.68571	1.14312	4.5935e-16	1.04548e-11
Tns3	0.593757	1.75357	1.15981	2.58103e-22	5.87442e-18
Slc7a11	0.777259	1.9476	1.17034	1.3335e-10	3.03504e-06
Cd200	1.17116	2.34201	1.17084	2.65609e-21	6.04526e-17
Socs3	0.262578	1.43418	1.1716	1.56212e-25	3.55538e-21
Bcl3	0.0340992	1.21213	1.17803	4.82826e-31	1.09891e-26
Dnah7a	0.112095	1.30909	1.19699	9.49371e-27	2.16077e-22
Ism1	0.372857	1.57233	1.19947	8.71194e-22	1.98284e-17
Camk2d	2.14902	3.3555	1.20649	4.50695e-33	1.02578e-28
B830012L14Rik	0.182617	1.41361	1.231	1.83042e-24	4.16604e-20
Gm26917	1.63598	2.88578	1.24979	6.27081e-22	1.42724e-17
St6gal1	1.33751	2.58953	1.25202	4.50691e-28	1.02577e-23
Pdzrn3	2.95826	4.22067	1.26241	1.0281e-50	2.33996e-46
Adcy2	0.245091	1.51564	1.27055	5.06274e-22	1.15228e-17
Cyp1b1	0.359	1.63623	1.27723	3.41863e-27	7.7808e-23
Sema5a	0.204681	1.48205	1.27737	1.35237e-19	3.07799e-15
Rasal2	1.5405	2.81937	1.27887	3.89737e-32	8.87041e-28
Rad51b	0.603913	1.88919	1.28528	2.3434e-15	5.33359e-11
Lsamp	2.22004	3.51046	1.29043	1.6411e-11	3.73513e-07
Rnf125	0.125472	1.42257	1.2971	2.94338e-28	6.69913e-24
Fstl1	2.36216	3.6607	1.29854	6.07502e-41	1.38268e-36
Ctsl	1.64078	2.95259	1.31182	1.06108e-34	2.41501e-30
Slc6a20a	1.88806	3.20826	1.3202	1.27049e-15	2.89163e-11
Tgfbr3	3.06416	4.38625	1.32209	1.65114e-79	3.75799e-75
Tgfbr2	1.75587	3.08266	1.3268	1.64533e-36	3.74476e-32
Arid5b	1.92023	3.24972	1.32949	1.26572e-36	2.88078e-32
Stat3	1.29052	2.62911	1.33859	3.55789e-37	8.09775e-33
Gm48228	0.843487	2.19227	1.34878	7.77153e-29	1.7688e-24
Akr1b3	0.355647	1.71463	1.35899	1.04691e-25	2.38277e-21
Osbpl3	0.29808	1.65792	1.35984	1.17466e-24	2.67354e-20
Igfbp5	1.22909	2.59715	1.36806	1.03785e-15	2.36215e-11
Rnf144a	0.0872497	1.45906	1.37181	3.1693e-31	7.21332e-27
Pde4b	0.5915	1.9675	1.376	1.30302e-26	2.96567e-22
Aig1	0.353934	1.74654	1.3926	2.86997e-29	6.53206e-25
Icam1	0.197648	1.59297	1.39532	3.55307e-27	8.08678e-23
Tbc1d8	0.5479	1.95373	1.40583	3.98118e-30	9.06116e-26
Rbbp8	0.469125	1.87715	1.40802	8.70053e-25	1.98024e-20
Sod2	0.231271	1.65507	1.42379	9.56327e-31	2.1766e-26
Kif21a	0.639308	2.08919	1.44988	4.65982e-27	1.06058e-22
Smoc2	1.26413	2.71846	1.45433	1.53556e-39	3.49494e-35
Synpo	0.285807	1.75153	1.46573	5.86527e-37	1.33494e-32
Por	1.17887	2.65772	1.47885	3.93334e-34	8.95228e-30
Tspan11	0.719449	2.20157	1.48212	8.26082e-41	1.88016e-36
Gpm6b	0.281523	1.77317	1.49164	1.43739e-26	3.27151e-22
Grk5	2.09047	3.60136	1.5109	9.68427e-44	2.20414e-39
Npas2	0.603433	2.12104	1.5176	1.62389e-32	3.69597e-28
Xbp1	0.608981	2.12782	1.51884	2.09162e-40	4.76052e-36
Ampd3	0.533065	2.05253	1.51946	3.19701e-40	7.27638e-36
Tenm2	0.153608	1.70254	1.54894	3.2523e-23	7.40224e-19
Pde3a	0.162529	1.71341	1.55088	2.19452e-30	4.99473e-26
Vipr2	0.0584099	1.62177	1.56336	5.52965e-37	1.25855e-32
Fry	1.10106	2.68339	1.58233	1.55883e-17	3.54789e-13
Bdkrb2	0.206236	1.79468	1.58844	7.61078e-36	1.73221e-31
Aldh1a2	1.37163	2.96634	1.59471	3.50209e-33	7.97075e-29
Csf3	0	1.59495	1.59495	1.25624e-38	2.8592e-34
Nfkbia	0.237394	1.85143	1.61403	5.8117e-38	1.32274e-33
Fndc3b	1.83175	3.44704	1.61529	2.90273e-68	6.60661e-64
Sulf1	0.456948	2.09075	1.63381	2.24207e-34	5.10295e-30
Cxcl1	0	1.63534	1.63534	3.6174e-38	8.2332e-34
Errfi1	0.714729	2.35412	1.63939	1.57108e-31	3.57579e-27
Hdac4	1.49464	3.14696	1.65232	6.15415e-69	1.40068e-64
Zbtb16	1.23196	2.8868	1.65484	6.81018e-54	1.55e-49
Ifitm1	0.347095	2.01928	1.67218	2.87924e-42	6.55315e-38
Clec2d	0.60391	2.30704	1.70313	9.59627e-49	2.18411e-44
Tmem100	0.615943	2.32319	1.70725	3.19512e-34	7.2721e-30
Cpne8	0.288759	1.99861	1.70985	7.66496e-42	1.74455e-37
Ifitm3	0.605065	2.32023	1.71516	2.92052e-50	6.64711e-46
Abi1	1.40605	3.12342	1.71737	1.71866e-53	3.91167e-49
Steap4	0.0184242	1.73744	1.71902	8.04704e-49	1.83151e-44
Gm29554	0.296142	2.02948	1.73334	2.20206e-42	5.0119e-38
Uty	0.00619939	1.73974	1.73354	3.47317e-44	7.90494e-40
Slc39a14	0.36887	2.1209	1.75203	3.76368e-38	8.56613e-34
Rnf150	0.21499	1.98573	1.77074	6.9502e-42	1.58187e-37
Camk1d	1.50013	3.35572	1.85559	5.89593e-68	1.34191e-63
Cebpd	0.394207	2.25969	1.86549	1.99959e-59	4.55107e-55
Cyyr1	0.230712	2.11216	1.88145	3.02821e-40	6.89221e-36
Osmr	0.0420847	1.93924	1.89715	6.26724e-59	1.42642e-54
Timp1	0.090361	2.01959	1.92923	2.82217e-51	6.42326e-47
Gm20400	0.40638	2.34297	1.93659	1.43105e-45	3.25708e-41
Mirg	0.496384	2.52688	2.03049	1.23622e-43	2.81363e-39
Prmt8	0.178288	2.27528	2.09699	2.09853e-54	4.77625e-50
Serping1	1.28988	3.43234	2.14246	2.74546e-96	6.24868e-92
Fbln1	1.42221	3.62466	2.20245	2.1889e-97	4.98194e-93
Spidr	0.805834	3.03491	2.22908	1.78742e-67	4.06817e-63
Gpcpd1	1.71554	4.0339	2.31836	1.35353e-107	3.08064e-103
Prg4	0.728768	3.08538	2.35662	1.67131e-44	3.80389e-40
Aspg	0.172428	2.54456	2.37213	1.47864e-81	3.36538e-77
Entpd3	0.0581666	2.46009	2.40192	6.82772e-68	1.55399e-63
Pde10a	0.585176	3.00206	2.41689	1.84869e-47	4.20762e-43
Sbno2	0.489848	2.92704	2.43719	5.74536e-92	1.30764e-87
Fth1	1.55662	3.99745	2.44083	8.68806e-138	1.9774e-133
Pde7b	2.23972	4.72704	2.48732	1.03147e-99	2.34762e-95
Meg3	4.14406	6.69002	2.54595	9.09479e-126	2.06997e-121
Ap4e1	0.704734	3.32045	2.61572	7.86291e-78	1.7896e-73
Olfr1033	0.62946	3.32974	2.70028	1.26666e-95	2.88293e-91
Cacna1d	0.919536	3.62426	2.70472	3.32222e-80	7.56138e-76
Alk	0.628916	3.39616	2.76724	1.23633e-73	2.81388e-69
Hdac9	0.587921	3.40633	2.81841	6.79563e-63	1.54669e-58
Esyt2	1.68085	4.50515	2.8243	2.84772e-146	6.48142e-142
Ttr	0.118138	3.10525	2.98712	1.33296e-89	3.03382e-85
Saa3	0.00710916	3.0337	3.02659	2.75531e-87	6.27109e-83
Kiz	0.540686	3.66056	3.11988	2.63369e-86	5.99429e-82
Lcn2	0	3.14948	3.14948	8.69363e-100	1.97867e-95
Lbp	1.63534	4.84709	3.21175	1.52666e-141	3.47468e-137
Apod	2.54171	6.17939	3.63768	2.73859e-174	6.23304e-170
Mt2	0.120776	3.76461	3.64383	2.71879e-149	6.18796e-145
Cp	1.08386	5.27503	4.19117	1.08766e-159	2.47551e-155
Mt1	0.898402	5.16165	4.26325	6.73721e-187	1.53339e-182

## Sheet: Endothelial cells
gene	log2(average expression control + 1)	log2(average expression infected + 1)	avg_log2FC	p_val	p_val_adj
Iigp1	3.50587	1.23495	-2.27093	3.60987e-223	8.21606e-219
Slc6a6	3.1056	0.844701	-2.2609	1.19063e-233	2.70988e-229
Tsix	2.78117	0.595211	-2.18596	0	0
Hmcn1	3.43264	1.34676	-2.08588	2.11316e-268	4.80955e-264
Xist	5.50716	3.42255	-2.08461	0	0
Dach2	2.46447	0.468019	-1.99646	6.64285e-204	1.51191e-199
Slc7a1	3.21239	1.22099	-1.9914	1.57902e-74	3.59385e-70
Gm20663	2.52626	0.576486	-1.94978	1.15307e-289	2.62439e-285
Rnf220	3.25861	1.39135	-1.86727	4.75157e-192	1.08146e-187
Tspan18	3.23398	1.47316	-1.76082	1.86249e-218	4.23902e-214
H2-D1	3.17474	1.49073	-1.684	4.36973e-179	9.94551e-175
Airn	4.15583	2.57952	-1.57631	2.10743e-187	4.79651e-183
Arhgap18	3.29988	1.73397	-1.56591	1.84671e-103	4.20311e-99
Piezo2	2.53685	0.971643	-1.56521	2.14024e-113	4.87118e-109
Lrp8	1.92036	0.36926	-1.5511	4.40014e-86	1.00147e-81
Mtss1	2.77301	1.2376	-1.53541	3.98948e-181	9.08005e-177
Eln	3.57948	2.05801	-1.52147	2.53128e-54	5.76119e-50
Pltp	1.92832	0.480277	-1.44805	1.44494e-141	3.28867e-137
Rora	3.92921	2.48675	-1.44246	2.09788e-163	4.77477e-159
Map2k6	1.71964	0.27733	-1.44231	1.22355e-156	2.7848e-152
Kdr	2.86319	1.4451	-1.41809	2.36008e-166	5.37155e-162
Ebf1	4.33467	2.9705	-1.36417	9.41987e-152	2.14396e-147
BC028528	1.73435	0.387083	-1.34727	3.03898e-157	6.91672e-153
Tek	3.48607	2.14532	-1.34075	1.59948e-162	3.64042e-158
Igf2r	2.0013	0.661692	-1.3396	3.68915e-158	8.39651e-154
Iqsec1	1.93861	0.600664	-1.33794	1.91e-108	4.34716e-104
Gatm	1.76837	0.442113	-1.32626	2.07185e-142	4.71554e-138
Tnfrsf19	1.85865	0.535955	-1.32269	4.62315e-82	1.05223e-77
Cd74	1.46987	0.164068	-1.3058	1.78936e-126	4.07258e-122
Ushbp1	2.17583	0.880479	-1.29535	7.18666e-164	1.63568e-159
Spock2	1.56524	0.276746	-1.2885	4.05777e-69	9.23549e-65
Ptprm	5.01513	3.73975	-1.27537	2.01907e-162	4.59541e-158
Nckap5	1.50961	0.239046	-1.27057	2.44278e-114	5.55977e-110
H2-K1	2.73427	1.46572	-1.26855	2.14615e-108	4.88463e-104
H2-Q4	1.50563	0.252434	-1.25319	5.59618e-168	1.27369e-163
Flrt2	2.77568	1.53254	-1.24314	1.82404e-78	4.15151e-74
Gm4951	1.47509	0.233127	-1.24197	8.56978e-109	1.95048e-104
Grb14	1.57378	0.336602	-1.23718	4.2873e-68	9.7579e-64
Adgre5	1.86706	0.631587	-1.23547	8.50817e-144	1.93646e-139
Ttyh2	1.5152	0.288917	-1.22628	3.54655e-90	8.07195e-86
Filip1	2.20327	0.981777	-1.22149	1.97568e-116	4.49664e-112
Aplnr	1.68665	0.485116	-1.20153	4.05808e-127	9.23618e-123
Gm12216	1.35108	0.156017	-1.19506	8.44951e-144	1.92311e-139
Stox2	4.58488	3.39037	-1.19451	7.7139e-139	1.75568e-134
Ppp1r16b	1.77199	0.579205	-1.19279	2.36482e-140	5.38234e-136
Etl4	2.96223	1.77289	-1.18934	7.26713e-99	1.654e-94
Pgm5	2.43427	1.24728	-1.18699	1.76106e-94	4.00818e-90
Elk3	3.88797	2.70607	-1.1819	5.45471e-143	1.24149e-138
Stat1	1.88913	0.711096	-1.17803	9.08282e-118	2.06725e-113
Pip5k1b	2.99534	1.83213	-1.16321	4.5953e-52	1.04589e-47
Dlc1	3.1203	1.96087	-1.15942	2.82196e-106	6.42279e-102
Adgrg6	1.73478	0.57988	-1.1549	3.08415e-73	7.01953e-69
Gab1	2.42239	1.27404	-1.14836	4.17923e-84	9.51192e-80
Fam155a	1.45334	0.324176	-1.12916	1.36012e-37	3.09564e-33
Auts2	4.53939	3.41056	-1.12883	1.15843e-129	2.63658e-125
Ttc28	3.13449	2.0181	-1.11639	6.20269e-120	1.41173e-115
Slco1c1	3.67114	2.555	-1.11614	4.69267e-28	1.06805e-23
Ppp1r9a	1.80872	0.694963	-1.11376	1.90416e-92	4.33386e-88
Irgm2	1.2858	0.172944	-1.11285	6.71176e-135	1.5276e-130
Nlrc5	1.34157	0.230582	-1.11099	2.06815e-136	4.7071e-132
Tox	2.86745	1.7621	-1.10535	5.20451e-53	1.18455e-48
Nav3	2.60915	1.50699	-1.10215	1.17911e-43	2.68365e-39
Prex1	1.50311	0.401739	-1.10137	2.1878e-98	4.97943e-94
Sox13	1.72635	0.626881	-1.09947	9.31432e-102	2.11994e-97
Prkag2	2.2698	1.17648	-1.09331	2.33648e-85	5.31783e-81
Nrp2	3.33521	2.2484	-1.08681	1.36714e-108	3.1116e-104
Mef2c	3.2773	2.19386	-1.08344	8.47172e-87	1.92816e-82
Gulp1	2.00142	0.926377	-1.07505	3.33646e-101	7.59379e-97
Vegfc	1.74755	0.673222	-1.07433	2.35569e-45	5.36155e-41
Cadm1	2.26622	1.19302	-1.0732	6.73204e-55	1.53221e-50
Lhfpl2	2.48356	1.41084	-1.07272	2.43409e-97	5.53999e-93
Plekhg1	4.07572	3.01919	-1.05652	5.14573e-109	1.17117e-104
Ldlrad4	3.84149	2.79225	-1.04924	1.5664e-119	3.56512e-115
Fbln2	1.39885	0.358928	-1.03992	3.77545e-70	8.59293e-66
Sept4	1.18071	0.14281	-1.0379	1.49812e-121	3.40972e-117
Zfp366	2.09873	1.06652	-1.03221	7.07967e-81	1.61133e-76
Adgrl4	3.45784	2.44003	-1.0178	1.77882e-102	4.0486e-98
Hdac7	2.62223	1.60531	-1.01692	5.61026e-110	1.27689e-105
Tm6sf1	1.54217	0.531748	-1.01042	9.32741e-98	2.12292e-93
Hspa12b	1.76654	0.766527	-1.00001	6.86213e-99	1.56182e-94
Eif2s3y	0.00478931	0.971092	0.966303	2.55379e-35	5.81243e-31
Vapa	0.767088	1.77412	1.00703	1.22655e-26	2.79163e-22
Dcbld2	0.574931	1.58219	1.00726	4.69133e-23	1.06775e-18
Bmpr2	2.73005	3.73895	1.0089	8.62463e-59	1.96297e-54
Tgm2	1.04461	2.05546	1.01086	2.4234e-21	5.51566e-17
Tbc1d8	0.887814	1.90119	1.01338	1.77858e-23	4.04804e-19
Gng12	1.68713	2.70487	1.01775	1.62712e-39	3.70333e-35
Sdc4	0.224884	1.24324	1.01835	1.02309e-31	2.32856e-27
Adam9	0.35902	1.37979	1.02077	2.73171e-31	6.21738e-27
Sntb2	2.01775	3.03977	1.02202	1.40709e-26	3.20254e-22
Nfkbiz	0.455379	1.47783	1.02246	1.09898e-30	2.50127e-26
Ifitm3	1.40629	2.42985	1.02356	9.82221e-40	2.23554e-35
Gm26917	1.67089	2.69883	1.02794	2.47707e-21	5.63782e-17
Ankrd28	1.82125	2.8519	1.03065	3.47624e-29	7.91193e-25
Aff3	0.757573	1.78822	1.03065	9.8284e-15	2.23694e-10
N4bp1	0.979019	2.01018	1.03116	7.37501e-25	1.67855e-20
Cd14	0.0251333	1.06137	1.03624	1.90806e-32	4.34275e-28
Pik3r5	0.0362633	1.0789	1.04264	7.30118e-35	1.66175e-30
Pappa	0.042732	1.09021	1.04747	2.01471e-28	4.58548e-24
Samsn1	0.271227	1.31934	1.04811	3.45339e-28	7.85991e-24
Fchsd2	2.65085	3.70265	1.05179	8.71241e-48	1.98295e-43
D10Wsu102e	0.131726	1.18484	1.05312	7.26547e-27	1.65362e-22
Tnfaip8	0.901239	1.95478	1.05354	7.27062e-27	1.65479e-22
Ccl2	0.107683	1.17929	1.07161	2.73642e-28	6.2281e-24
Slc10a6	0	1.07447	1.07447	3.23666e-40	7.36664e-36
Mgat5	1.3321	2.41298	1.08088	1.45323e-28	3.30755e-24
Meg3	1.11072	2.19264	1.08193	8.78719e-36	1.99997e-31
Mid1	1.82725	2.91182	1.08457	1.3788e-46	3.13816e-42
Plxna2	2.14647	3.23113	1.08466	4.5316e-56	1.03139e-51
Hipk1	0.900129	1.9849	1.08477	1.6171e-29	3.68051e-25
Myrip	0.817144	1.90245	1.08531	2.1354e-29	4.86018e-25
Stat3	1.66542	2.75164	1.08621	1.54398e-48	3.5141e-44
Mctp1	2.15959	3.25138	1.09178	1.54512e-27	3.51669e-23
Klhl2	1.51036	2.60275	1.09239	2.26251e-35	5.14948e-31
Atp8b1	1.36089	2.45538	1.09449	3.72606e-35	8.48052e-31
Lipa	0.602391	1.70385	1.10146	6.36368e-22	1.44837e-17
Mark1	0.222534	1.33836	1.11582	8.60241e-27	1.95791e-22
Mlxip	0.5871	1.71089	1.12378	9.28574e-30	2.11343e-25
Gda	0.330848	1.45783	1.12699	1.28833e-24	2.93223e-20
Acat3	0	1.12934	1.12934	1.70696e-42	3.88505e-38
Adipor2	0.934816	2.0648	1.12998	7.0088e-29	1.5952e-24
S1pr1	1.22487	2.36293	1.13805	5.5702e-37	1.26778e-32
Ddx3y	0.00103953	1.14211	1.14107	2.64011e-41	6.0089e-37
Socs3	0.172903	1.32664	1.15374	1.982e-41	4.51103e-37
Tll1	1.94502	3.10153	1.15651	7.30384e-21	1.66235e-16
Rell1	0.763464	1.92089	1.15742	2.16791e-29	4.93417e-25
Slc1a3	0.891692	2.05507	1.16337	3.49705e-25	7.95929e-21
Nfkb1	2.04529	3.21759	1.1723	2.97617e-65	6.77377e-61
Lrmda	2.21421	3.39632	1.1821	1.05687e-53	2.40544e-49
Serping1	0.305537	1.4884	1.18286	1.39852e-36	3.18303e-32
Timp1	0.177274	1.36504	1.18777	2.82898e-39	6.43876e-35
Cdyl	1.21403	2.41162	1.1976	6.31279e-33	1.43679e-28
Pdzd2	1.80481	3.00437	1.19957	2.08244e-45	4.73963e-41
Cebpb	0.164408	1.36462	1.20022	2.55908e-43	5.82446e-39
Rnd1	0.094714	1.29997	1.20526	2.48663e-37	5.65957e-33
Irak2	0.844308	2.05758	1.21327	1.311e-29	2.98383e-25
Pla2g4a	0.787946	2.00538	1.21743	2.15552e-30	4.90596e-26
Gm20400	0.12624	1.34881	1.22257	1.34854e-40	3.06928e-36
Sgms1	2.17072	3.39481	1.22408	1.92209e-78	4.37468e-74
Ibtk	0.441037	1.68131	1.24028	3.91313e-35	8.90627e-31
Mctp2	0.0237048	1.28786	1.26415	2.61888e-44	5.96056e-40
Lpl	0.0763027	1.34228	1.26598	4.78573e-30	1.08923e-25
Pdlim1	0.586409	1.85371	1.2673	3.48773e-37	7.93808e-33
March3	1.82814	3.10947	1.28133	2.14189e-44	4.87495e-40
Trpm3	1.22143	2.50526	1.28382	4.14412e-49	9.43203e-45
Dennd4a	0.979145	2.26512	1.28597	1.73177e-31	3.94151e-27
Birc3	0.352603	1.64703	1.29443	4.69445e-42	1.06846e-37
Por	0.625836	1.92084	1.29501	4.13903e-41	9.42043e-37
Steap4	0.119975	1.42152	1.30155	2.57171e-46	5.85321e-42
Itgb3	0.122607	1.4348	1.31219	1.02267e-50	2.3276e-46
Stard5	1.01448	2.32887	1.31439	1.50363e-35	3.42225e-31
Mical3	1.2813	2.59668	1.31537	3.1755e-46	7.22743e-42
Ern1	0.551764	1.87099	1.31923	4.20191e-43	9.56356e-39
Galnt18	2.64713	3.98147	1.33434	7.09625e-50	1.61511e-45
Usp54	0.58103	1.91973	1.3387	5.20127e-39	1.18381e-34
Npas2	0.201514	1.54461	1.34309	1.49534e-40	3.4034e-36
Tmem252	0.286416	1.63801	1.3516	9.11902e-48	2.07549e-43
Hif1a	1.2691	2.62254	1.35344	1.93529e-66	4.40472e-62
Cxcl2	0.00625607	1.36031	1.35405	1.73105e-43	3.93986e-39
Ctps	0.481362	1.84075	1.35938	3.87776e-48	8.82577e-44
Spidr	0.891814	2.25345	1.36164	3.08807e-51	7.02844e-47
Osmr	0.963431	2.33282	1.36939	1.39658e-51	3.17861e-47
Ugcg	1.05044	2.4211	1.37065	2.31897e-51	5.27797e-47
Ap4e1	0.708566	2.08994	1.38137	7.44632e-44	1.69478e-39
Ptgs2	0.0236368	1.44771	1.42408	1.80653e-46	4.11167e-42
Gm15283	1.04044	2.4653	1.42486	4.72055e-47	1.0744e-42
Tacc1	2.12303	3.56031	1.43728	2.18938e-107	4.98304e-103
Cebpd	0.393557	1.88681	1.49325	8.73997e-65	1.98922e-60
Slc41a2	0.00946345	1.50716	1.4977	3.84834e-47	8.75882e-43
Lrg1	0.356563	1.86695	1.51039	2.08087e-60	4.73605e-56
Cpne8	1.77652	3.28926	1.51274	1.66159e-103	3.78177e-99
Edn1	0.381116	1.9223	1.54118	2.73509e-33	6.22507e-29
Akap12	0.777275	2.32531	1.54804	3.86137e-40	8.78848e-36
Igfbp3	0.961912	2.5211	1.55919	2.68757e-58	6.11691e-54
Pard3	2.76987	4.35334	1.58347	6.62503e-146	1.50786e-141
Ctsl	1.14065	2.72882	1.58818	7.83534e-54	1.78332e-49
Plcb4	2.89509	4.49393	1.59884	1.71744e-192	3.9089e-188
Sema3a	0.239936	1.87103	1.63109	1.95829e-32	4.45708e-28
Sbno2	0.97279	2.61484	1.64205	2.05813e-79	4.6843e-75
Lhfpl3	0.190702	1.84767	1.65697	5.70431e-34	1.2983e-29
Ifitm1	0.178717	1.83622	1.6575	7.93102e-76	1.8051e-71
Uty	0.016964	1.69256	1.67559	1.96892e-70	4.48126e-66
Ndfip1	1.63171	3.31631	1.6846	3.3338e-84	7.58772e-80
Glis3	0.563736	2.25335	1.68961	3.31624e-51	7.54777e-47
Olfr1033	0.283366	1.97698	1.69362	1.04363e-70	2.3753e-66
Csf2rb	0.407264	2.12615	1.71889	4.13186e-76	9.40411e-72
Arhgap26	2.71822	4.44761	1.72939	3.01338e-193	6.85845e-189
Irak3	0.135212	1.89126	1.75605	2.35204e-77	5.35323e-73
Susd6	2.2974	4.05675	1.75936	1.14106e-162	2.59706e-158
Xbp1	0.576984	2.33901	1.76202	6.05686e-89	1.37854e-84
Rnf125	0.537946	2.31413	1.77618	1.40565e-84	3.19925e-80
Ier3	0.426526	2.25322	1.82669	2.20198e-93	5.01172e-89
Hif3a	0.104865	1.95711	1.85224	7.42941e-88	1.69093e-83
Icam1	1.01075	2.87277	1.86202	1.04926e-74	2.38812e-70
Lbp	0.779752	2.67435	1.8946	1.65304e-107	3.76231e-103
Ackr1	0.0470273	1.94265	1.89563	1.31138e-79	2.9847e-75
Slc39a14	0.359734	2.26863	1.9089	6.80856e-90	1.54963e-85
Errfi1	0.531771	2.44163	1.90986	2.80459e-69	6.38325e-65
Serpina3n	0	1.98019	1.98019	1.31159e-84	2.98517e-80
Sod2	0.259646	2.31403	2.05439	1.84556e-117	4.20049e-113
Pawr	0.650842	2.71917	2.06832	7.74888e-109	1.76365e-104
Tnip1	0.542098	2.66401	2.12191	1.15032e-120	2.61812e-116
Nfkbia	0.878183	3.00235	2.12417	3.80712e-153	8.66501e-149
Fth1	2.11647	4.30572	2.18925	1.84899e-305	4.20829e-301
Cfh	2.31531	4.60126	2.28595	7.29658e-158	1.6607e-153
Fkbp5	0.722656	3.02805	2.3054	9.87088e-146	2.24661e-141
Apod	0.610473	3.00653	2.39605	4.98091e-182	1.13365e-177
Fmnl2	2.93074	5.32977	2.39902	0	0
Kiz	0.546861	3.17836	2.6315	2.78333e-149	6.33485e-145
Pde4b	1.50123	4.13418	2.63295	9.63242e-225	2.19234e-220
Cxcl1	0.0106464	2.75102	2.74037	4.23215e-139	9.63237e-135
Zbtb16	0.153277	2.93096	2.77768	2.27817e-184	5.18512e-180
Selp	0.432502	3.2962	2.8637	3.29548e-112	7.50052e-108
Saa3	0.00645639	2.92705	2.9206	3.68823e-208	8.39441e-204
Cp	1.09377	4.38901	3.29524	4.74228e-273	1.07934e-268
Mt2	0.104163	3.52716	3.423	0	0
Ttr	0.162742	3.77531	3.61257	1.96592e-273	4.47444e-269
Il1r1	1.44802	5.10897	3.66095	4.04103e-209	9.19738e-205
Csf3	0	3.83761	3.83761	5.06537e-251	1.15288e-246
Mt1	0.453921	4.61395	4.16003	0	0
Lcn2	0.00647316	4.87238	4.8659	0	0

## Sheet: Fibroblast arachnoid
gene	log2(average expression control + 1)	log2(average expression infected + 1)	avg_log2FC	p_val	p_val_adj
Unc13c	2.64114	0.432132	-2.20901	0	0
Tsix	3.12847	0.981569	-2.1469	0	0
Rbfox1	5.60143	3.57531	-2.02612	2.57714e-145	5.86556e-141
Nr3c2	3.34797	1.65755	-1.69043	0	0
Xist	5.74782	4.091	-1.65682	0	0
Slc6a1	2.48267	0.835281	-1.64739	0	0
Ptn	4.66938	3.03286	-1.63652	0	0
Frmpd4	3.67872	2.16207	-1.51665	8.00144e-258	1.82113e-253
Tmtc4	3.6914	2.17902	-1.51239	0	0
Aebp1	3.39251	1.93944	-1.45307	0	0
Igsf8	3.39578	1.95862	-1.43716	4.03825e-294	9.19106e-290
Dock6	2.74273	1.33917	-1.40355	4.9688e-304	1.1309e-299
Plekhg1	3.2833	1.92596	-1.35734	6.29139e-270	1.43192e-265
Hlf	3.64903	2.31394	-1.33509	7.71595e-278	1.75615e-273
Sncaip	2.54502	1.21312	-1.33189	1.84036e-288	4.18866e-284
Adamts12	3.11338	1.78321	-1.33018	1.427e-186	3.24786e-182
Wwox	3.70136	2.37326	-1.3281	6.9742e-230	1.58733e-225
Btg2	2.30233	0.974912	-1.32742	7.78435e-116	1.77172e-111
Rab30	2.11258	0.790288	-1.3223	3.57992e-300	8.1479e-296
Gm48742	2.41028	1.12502	-1.28526	3.66606e-250	8.34396e-246
Aifm3	2.42053	1.14359	-1.27694	8.056e-207	1.83355e-202
Nadk2	2.22174	0.950444	-1.2713	6.3855e-212	1.45334e-207
Zfp536	3.13644	1.88542	-1.25101	1.14667e-241	2.60982e-237
Fosb	1.30477	0.055039	-1.24973	8.35821e-112	1.90233e-107
Unc5c	3.25931	2.01329	-1.24602	3.56316e-218	8.10976e-214
Prkag2	3.91362	2.69272	-1.2209	8.84115e-276	2.01225e-271
Slc4a4	3.77816	2.58347	-1.1947	1.5227e-157	3.46567e-153
Alcam	5.72435	4.53208	-1.19227	4.69085e-257	1.06764e-252
Prdm6	3.13374	1.96724	-1.1665	1.36785e-220	3.11322e-216
Osbpl8	2.83866	1.67945	-1.15921	3.02668e-202	6.88873e-198
Gsdme	3.64167	2.5073	-1.13437	2.2913e-243	5.21499e-239
Col26a1	3.11695	1.99455	-1.12239	5.15882e-227	1.17415e-222
Igfbp2	3.06018	1.96662	-1.09356	2.14655e-150	4.88556e-146
Creb5	1.5268	0.448289	-1.07852	1.35846e-135	3.09186e-131
Sept6	1.53472	0.482893	-1.05183	1.47656e-174	3.36065e-170
Mpped2	2.8179	1.76821	-1.04968	1.35562e-177	3.08539e-173
Atp1a2	5.57924	4.53718	-1.04206	2.48765e-225	5.6619e-221
Angptl2	1.20607	0.165168	-1.0409	1.24036e-223	2.82307e-219
Mpp6	2.88369	1.86229	-1.0214	1.60497e-200	3.65291e-196
Wnt6	1.39366	0.37269	-1.02096	8.43383e-200	1.91954e-195
Hs3st3a1	1.42201	0.408696	-1.01332	4.83082e-156	1.09949e-151
A230057D06Rik	2.45904	1.449	-1.01004	1.34553e-120	3.06242e-116
Sphkap	1.47463	0.464679	-1.00995	6.97506e-88	1.58752e-83
Ppargc1b	1.69694	0.688227	-1.00871	4.00415e-184	9.11345e-180
Ddx3y	0.0130248	0.956191	0.943166	6.67138e-74	1.51841e-69
Chst11	1.38726	2.39196	1.0047	3.21768e-44	7.32344e-40
Clic4	1.82104	2.8271	1.00606	3.35421e-66	7.63419e-62
Timp1	0.151613	1.1653	1.01368	2.6214e-78	5.96632e-74
Pde4b	1.39888	2.41279	1.01391	2.32595e-56	5.29386e-52
Nt5e	0.233219	1.24816	1.01494	2.15483e-46	4.9044e-42
Tgfbr3	3.16878	4.19025	1.02148	4.32477e-188	9.84318e-184
Slc22a15	0.209899	1.23875	1.02885	1.12412e-72	2.55849e-68
Rgs16	0.21914	1.25184	1.0327	3.58239e-67	8.15351e-63
Rasal2	1.53511	2.57329	1.03818	8.61997e-67	1.9619e-62
Cacna1d	1.8308	2.88219	1.05139	3.17436e-46	7.22485e-42
Slc7a11	3.13933	4.2051	1.06578	4.01089e-68	9.12878e-64
Rassf4	0.0369761	1.10433	1.06735	1.04051e-82	2.3682e-78
Eif2s3y	0	1.0706	1.0706	1.57926e-89	3.59441e-85
Pear1	0.872254	1.95383	1.08158	2.16016e-74	4.91653e-70
Errfi1	2.67944	3.76988	1.09045	2.99374e-58	6.81375e-54
Cfh	2.97557	4.06743	1.09187	3.09993e-93	7.05544e-89
Serpina3n	0.00161246	1.11942	1.11781	1.98793e-90	4.52453e-86
Pde3a	0.406059	1.53518	1.12912	9.15967e-49	2.08474e-44
Pros1	0.475048	1.60983	1.13478	1.64678e-81	3.74806e-77
Fmnl2	2.5345	3.67307	1.13857	5.78781e-100	1.3173e-95
Matn2	0.578145	1.72796	1.14982	3.46865e-57	7.89464e-53
Relb	0.354945	1.51027	1.15533	8.01668e-74	1.8246e-69
Hdac4	1.41545	2.5761	1.16065	9.6528e-89	2.19698e-84
Slc2a13	1.66748	2.82981	1.16233	4.38273e-53	9.97508e-49
Ccl2	0.0537028	1.22254	1.16884	1.06737e-73	2.42933e-69
Man1a	0.939195	2.1114	1.17221	5.93713e-85	1.35129e-80
Sox5	0.467305	1.6478	1.1805	1.12226e-46	2.55427e-42
Dcdc2a	2.18499	3.3822	1.19722	9.35561e-97	2.12934e-92
Csf3	0.00174681	1.20398	1.20223	1.36925e-95	3.11641e-91
H19	0.982942	2.18974	1.20679	1.0634e-77	2.42031e-73
Slc41a2	0.098754	1.31212	1.21337	7.5136e-90	1.71009e-85
Aldh1a2	2.80137	4.02896	1.22759	1.02154e-192	2.32502e-188
Casp4	0.023468	1.25995	1.23648	4.66831e-104	1.06251e-99
Il6st	1.19968	2.45332	1.25365	2.13005e-69	4.848e-65
Ctps	0.579295	1.83396	1.25466	2.26251e-80	5.14948e-76
Meg3	4.85416	6.11405	1.25988	7.65417e-113	1.74209e-108
Bcl3	0.0879885	1.3793	1.29131	9.42213e-120	2.14448e-115
Susd6	1.87501	3.17481	1.29981	5.40256e-140	1.22962e-135
Cpne8	0.11505	1.42156	1.30651	1.04049e-105	2.36815e-101
Slc39a14	0.389468	1.69719	1.30772	1.92931e-78	4.39111e-74
Ifitm3	0.779986	2.09209	1.3121	1.21365e-115	2.76226e-111
Ap4e1	0.613984	1.93343	1.31944	5.11476e-71	1.16412e-66
Xbp1	0.557228	1.89834	1.34112	3.97928e-106	9.05685e-102
Rnf144a	0.134352	1.47884	1.34449	7.36046e-111	1.67524e-106
Fkbp5	1.66039	3.01157	1.35119	1.29835e-170	2.95505e-166
Ror1	2.75953	4.11695	1.35741	2.12505e-190	4.8366e-186
Gm26917	1.84219	3.21758	1.3754	3.61501e-93	8.22776e-89
Scara5	0.0701	1.45241	1.38231	1.34273e-86	3.05605e-82
Sod2	0.314408	1.69977	1.38536	5.03147e-106	1.14516e-101
Ifitm1	0.475181	1.86137	1.38619	1.08261e-123	2.46402e-119
Kif21a	0.347127	1.7417	1.39458	8.93025e-81	2.03253e-76
Tbc1d8	0.297368	1.69445	1.39708	7.19914e-113	1.63852e-108
Birc3	0.242738	1.68587	1.44314	6.07787e-117	1.38332e-112
Olfr1033	0.265695	1.71723	1.45154	2.44021e-115	5.55392e-111
Rhoj	0.889074	2.36796	1.47889	2.25994e-98	5.14363e-94
Tgfbr2	1.43507	2.91468	1.47961	2.25257e-119	5.12685e-115
Por	1.54283	3.02613	1.48329	3.90266e-148	8.88245e-144
Mid1	1.38573	2.87235	1.48661	3.02789e-160	6.89147e-156
Stat3	0.868064	2.35539	1.48733	1.37858e-151	3.13766e-147
Tmem100	0.312462	1.80164	1.48918	6.73208e-91	1.53222e-86
Vipr2	0.0791766	1.57648	1.49731	3.4844e-115	7.9305e-111
Mirg	0.562943	2.06923	1.50629	2.05766e-78	4.68324e-74
Pde4d	2.03915	3.55383	1.51468	8.27207e-103	1.88272e-98
Cyp7b1	1.41349	2.95023	1.53674	2.36041e-47	5.37229e-43
Nfkbia	0.174298	1.72593	1.55163	1.80035e-145	4.09759e-141
Spidr	0.515484	2.07382	1.55834	3.80325e-117	8.65619e-113
Clec2d	1.09525	2.69736	1.60211	5.20587e-187	1.18486e-182
Serping1	0.934457	2.56056	1.6261	4.49916e-193	1.02401e-188
Uty	0.0161547	1.66415	1.648	3.14144e-159	7.14992e-155
Osmr	0.46826	2.12117	1.65291	9.67553e-167	2.20215e-162
Cxadr	2.13948	3.80889	1.6694	2.24053e-260	5.09944e-256
Alas1	0.626706	2.31495	1.68825	5.6396e-81	1.28357e-76
Ampd3	0.908	2.6063	1.6983	1.9807e-203	4.50806e-199
Esyt2	1.23253	2.94488	1.71235	9.87591e-202	2.24776e-197
Icam1	0.256242	1.9828	1.72656	7.24907e-134	1.64989e-129
Igfbp3	0.737868	2.51119	1.77332	1.2287e-162	2.79652e-158
Gpm6b	0.394144	2.18285	1.78871	1.29426e-99	2.94574e-95
Steap4	0.0277439	1.8294	1.80166	2.98412e-177	6.79186e-173
Pdgfra	1.3977	3.20621	1.80851	7.49753e-184	1.70644e-179
Cyp1b1	0.873899	2.68607	1.81217	4.20678e-188	9.57463e-184
Gpcpd1	1.97217	3.82112	1.84895	9.70051e-190	2.20784e-185
Kiz	0.458447	2.31467	1.85622	2.99524e-188	6.81717e-184
Npas2	0.765974	2.65113	1.88516	2.38482e-209	5.42784e-205
Pde7b	2.79337	4.70952	1.91615	9.7123e-289	2.21052e-284
Neat1	1.4441	3.36045	1.91635	1.75823e-182	4.00172e-178
Fbln1	1.46651	3.39615	1.92964	3.41389e-249	7.77002e-245
Cebpd	0.405567	2.34106	1.9355	1.24009e-234	2.82244e-230
Cxcl1	0.00517794	1.97222	1.96704	1.20031e-190	2.7319e-186
Pappa	0.115387	2.10182	1.98643	4.37782e-76	9.96393e-72
Sbno2	0.471371	2.55235	2.08097	1.36168e-251	3.09917e-247
Zbtb16	0.659879	2.80295	2.14307	2.18296e-305	4.96841e-301
Gm17268	0.0395768	2.23087	2.1913	1.7783e-75	4.04742e-71
Fth1	1.83123	4.03632	2.20508	0	0
Il1r1	0.132819	2.37943	2.24661	1.49282e-128	3.39765e-124
Lbp	0.0914668	2.37635	2.28488	3.07643e-222	7.00195e-218
Pde10a	0.965412	3.2844	2.31899	1.74625e-164	3.97448e-160
Alk	1.6209	4.09139	2.47049	0	0
Saa3	0.00606111	2.58687	2.58081	0	0
Aspg	0.391263	3.04821	2.65694	0	0
Lcn2	0.00899423	2.96098	2.95198	0	0
Cp	2.2455	5.23167	2.98617	0	0
Ttr	0.242303	3.34747	3.10517	0	0
Mt2	0.232939	3.35898	3.12604	0	0
Mt1	1.02143	4.72115	3.69972	0	0
Apod	2.78666	6.59344	3.80678	0	0

## Sheet: Fibroblast dura 1
gene	log2(average expression control + 1)	log2(average expression infected + 1)	avg_log2FC	p_val	p_val_adj
Nav2	4.27821	0.459117	-3.8191	0	0
Cdh18	4.00938	1.09112	-2.91826	0	0
Pid1	4.95687	2.39356	-2.56331	0	0
Tsix	3.05686	0.601612	-2.45525	0	0
Col14a1	3.89618	1.46971	-2.42647	0	0
Mmp16	4.08924	1.75651	-2.33274	0	0
Slc24a3	4.39259	2.06962	-2.32297	0	0
Rbfox1	3.36901	1.04879	-2.32021	6.08857e-145	1.38576e-140
Col8a1	3.30621	1.0606	-2.24561	3.89005e-181	8.85374e-177
Prdm6	4.13833	1.92898	-2.20935	0	0
Xist	5.73194	3.5781	-2.15384	0	0
Plxna4	2.40206	0.302303	-2.09975	0	0
Slc6a6	3.09325	0.994827	-2.09843	0	0
Palld	3.56622	1.49541	-2.07081	0	0
Slc4a10	4.28475	2.26458	-2.02017	0	0
Adamts12	2.94537	0.949273	-1.9961	0	0
Caln1	2.08749	0.105186	-1.9823	0	0
Opcml	3.14156	1.19645	-1.94511	1.80047e-33	4.09786e-29
Fhod3	2.34943	0.425763	-1.92367	0	0
Gnas	5.11836	3.19653	-1.92183	0	0
Ptn	3.49346	1.58513	-1.90833	0	0
Eln	3.47309	1.56597	-1.90712	1.81412e-212	4.12893e-208
Ptprd	4.54926	2.65584	-1.89342	0	0
Rab30	2.26027	0.393696	-1.86658	0	0
Pcdh7	5.07541	3.23319	-1.84222	0	0
Sncaip	2.25857	0.454617	-1.80396	0	0
Cdh11	5.09242	3.28971	-1.80271	0	0
A230057D06Rik	2.53172	0.73575	-1.79597	0	0
Mfap4	3.00761	1.2388	-1.76881	0	0
Dkk2	2.26587	0.517528	-1.74834	2.76328e-193	6.28923e-189
Cobl	2.25536	0.511765	-1.7436	3.89495e-290	8.8649e-286
Dner	1.86446	0.136624	-1.72783	2.13377e-255	4.85646e-251
Lama2	2.99308	1.27415	-1.71893	0	0
Spats2l	2.30155	0.583516	-1.71803	0	0
Adamts6	2.32626	0.639209	-1.68705	0	0
Col1a1	4.55816	2.91409	-1.64407	0	0
Epha5	2.23845	0.601499	-1.63695	5.82265e-273	1.32524e-268
Gulp1	3.71131	2.07579	-1.63552	0	0
Foxp2	5.74385	4.11841	-1.62544	0	0
Fam155a	3.27309	1.6696	-1.60349	1.49143e-171	3.39449e-167
Plagl1	2.69672	1.09763	-1.59909	0	0
Klf12	2.95185	1.35289	-1.59896	0	0
B3galt1	3.7869	2.21441	-1.57249	1.27702e-261	2.90651e-257
Ednra	2.37578	0.808809	-1.56697	5.93685e-274	1.35123e-269
Fam110b	2.75396	1.18968	-1.56428	0	0
Sesn3	2.39199	0.84356	-1.54843	6.14146e-258	1.3978e-253
Srgap3	2.58271	1.0348	-1.54791	0	0
Kcnq1	2.68853	1.14595	-1.54259	0	0
Mid1	4.96821	3.42861	-1.5396	2.93396e-195	6.6777e-191
Gucy1a2	2.00583	0.473716	-1.53211	2.32321e-265	5.28764e-261
Zfp804b	3.12849	1.62098	-1.50751	7.01421e-171	1.59643e-166
Csrp2	2.09975	0.60727	-1.49248	9.48104e-274	2.15789e-269
Cdkn1c	2.02027	0.53495	-1.48532	1.18866e-282	2.70539e-278
Gxylt2	2.14459	0.664457	-1.48013	4.45286e-283	1.01347e-278
Auts2	5.70361	4.22843	-1.47518	0	0
Col1a2	5.17518	3.70018	-1.475	0	0
Phactr2	2.42737	0.958992	-1.46838	1.05409e-238	2.39911e-234
Gm20721	1.79691	0.334707	-1.4622	1.71165e-296	3.89573e-292
Igf2r	2.26006	0.814393	-1.44566	6.39795e-295	1.45617e-290
Kank1	2.13038	0.689761	-1.44062	1.19835e-216	2.72746e-212
Snx24	2.48702	1.05048	-1.43654	8.37332e-251	1.90577e-246
Foxd1	2.93935	1.50334	-1.43601	0	0
Dock4	3.75956	2.33453	-1.42503	6.93086e-287	1.57746e-282
Esrrg	1.78357	0.360611	-1.42296	8.68469e-166	1.97664e-161
Samd5	1.83711	0.425823	-1.41129	2.11074e-271	4.80405e-267
Slc47a1	1.69933	0.288479	-1.41086	1.92419e-136	4.37945e-132
Astn2	2.27667	0.871377	-1.40529	2.59396e-162	5.90386e-158
Basp1	2.6657	1.26431	-1.4014	6.44113e-191	1.466e-186
Gpc3	2.66333	1.26332	-1.40002	7.49624e-218	1.70614e-213
Vcan	3.52398	2.12995	-1.39403	6.04964e-229	1.3769e-224
Gm29478	1.98011	0.586918	-1.39319	3.54938e-184	8.07839e-180
Xylt1	1.74839	0.398343	-1.35005	8.15685e-261	1.8565e-256
Gm47271	1.93464	0.588189	-1.34646	9.97e-216	2.26917e-211
Ppp2r2b	1.75242	0.416163	-1.33626	1.38788e-149	3.15881e-145
Ctnnd2	2.33303	1.00736	-1.32567	1.7292e-55	3.93567e-51
Rhobtb1	1.93272	0.610108	-1.32262	1.83807e-251	4.18344e-247
Negr1	2.38468	1.06547	-1.31921	4.08861e-130	9.30567e-126
Sulf2	1.96515	0.668543	-1.29661	1.27501e-230	2.90192e-226
Svil	3.22155	1.925	-1.29655	1.28276e-226	2.91957e-222
Slc16a9	2.15283	0.856537	-1.29629	3.22584e-169	7.34202e-165
Col12a1	3.88756	2.60284	-1.28472	1.94392e-277	4.42436e-273
Ttc28	2.94061	1.65904	-1.28157	5.85314e-257	1.33217e-252
Pmepa1	2.44479	1.16441	-1.28038	1.88295e-222	4.28559e-218
Adam23	1.87327	0.597987	-1.27528	1.60035e-173	3.6424e-169
Gm42439	2.1235	0.850838	-1.27266	9.83466e-238	2.23837e-233
Airn	4.49585	3.22329	-1.27256	6.83172e-308	1.5549e-303
Chsy1	2.19464	0.93323	-1.26141	7.89966e-195	1.79796e-190
Six1	2.28898	1.03117	-1.25781	2.2033e-185	5.01471e-181
Plpp3	3.86485	2.6077	-1.25716	1.04228e-197	2.37223e-193
Gm26827	1.73114	0.480275	-1.25087	5.6848e-225	1.29386e-220
Sipa1l1	2.77212	1.52196	-1.25017	8.55249e-237	1.94655e-232
Thbs2	1.62015	0.376719	-1.24343	6.20237e-232	1.41166e-227
Mecom	3.45102	2.20884	-1.24218	5.91337e-146	1.34588e-141
Nfix	2.16221	0.92831	-1.2339	5.92231e-234	1.34792e-229
Foxn3	3.69418	2.46144	-1.23274	5.22995e-226	1.19034e-221
Grb10	4.2735	3.04815	-1.22535	1.63433e-287	3.71974e-283
Nlgn1	3.3146	2.09277	-1.22183	3.65471e-164	8.31812e-160
Ebf2	1.82475	0.604878	-1.21987	2.37667e-66	5.4093e-62
Plcl1	2.10212	0.882683	-1.21943	8.95202e-149	2.03748e-144
Rin2	2.46854	1.25154	-1.21701	2.64441e-203	6.01867e-199
Snx2	2.16645	0.950006	-1.21645	6.04228e-192	1.37522e-187
Mpped2	2.50339	1.29086	-1.21253	2.54328e-177	5.7885e-173
Sema3c	2.13186	0.9326	-1.19926	8.15463e-138	1.85599e-133
Ttc3	2.51318	1.31701	-1.19617	6.34521e-234	1.44417e-229
Igdcc4	1.59688	0.405727	-1.19115	2.49531e-256	5.67932e-252
Map2k6	1.40188	0.215956	-1.18593	1.11736e-229	2.54311e-225
Fras1	1.44399	0.268029	-1.17596	1.71287e-189	3.8985e-185
Adam33	1.65081	0.476393	-1.17442	8.92418e-168	2.03114e-163
Daam2	2.06514	0.904428	-1.16072	1.17452e-161	2.67321e-157
Gm48742	1.87218	0.715901	-1.15628	2.0074e-182	4.56884e-178
Tmem200a	1.38304	0.229516	-1.15352	9.42029e-214	2.14406e-209
Lmx1a	1.31606	0.16644	-1.14962	2.82459e-196	6.42876e-192
Map2	1.49057	0.341832	-1.14874	9.21264e-170	2.0968e-165
Il1rapl2	1.41106	0.264311	-1.14675	3.89424e-66	8.8633e-62
Eya1	1.90751	0.766245	-1.14126	4.85662e-140	1.10537e-135
Galnt13	2.64302	1.50307	-1.13994	5.64469e-57	1.28473e-52
Hes1	1.72861	0.594755	-1.13386	4.78126e-145	1.08821e-140
Robo1	3.83189	2.69949	-1.1324	7.49992e-142	1.70698e-137
Ebf1	5.82004	4.68858	-1.13146	8.78628e-182	1.99976e-177
Chrna7	1.22568	0.0962515	-1.12943	4.72592e-149	1.07562e-144
Ogn	1.59786	0.472427	-1.12544	5.49909e-202	1.25159e-197
Col8a2	1.59993	0.48082	-1.11911	8.2983e-169	1.88869e-164
Fam19a2	2.46459	1.34648	-1.11811	1.52801e-86	3.47774e-82
Tanc2	3.26766	2.15479	-1.11287	1.38659e-212	3.15589e-208
Plcl2	1.50624	0.396552	-1.10969	4.1456e-181	9.43539e-177
Fndc1	1.86338	0.763258	-1.10012	7.64848e-168	1.7408e-163
Sorcs2	1.64372	0.544934	-1.09878	1.52558e-187	3.47221e-183
Kctd12	1.27087	0.182532	-1.08834	5.90999e-220	1.34511e-215
Slc23a2	4.0881	3.00215	-1.08595	9.97568e-153	2.27047e-148
Neo1	2.87389	1.78808	-1.08581	4.11341e-182	9.36211e-178
Samd4	2.70173	1.62682	-1.07491	4.58743e-153	1.0441e-148
Atp1b1	1.53602	0.461436	-1.07458	7.3411e-183	1.67083e-178
Mfap2	1.47409	0.41352	-1.06057	2.75363e-187	6.26726e-183
Asap1	2.76114	1.70167	-1.05947	2.4244e-181	5.51794e-177
1500015O10Rik	1.73987	0.68442	-1.05545	3.33404e-158	7.58827e-154
Nhsl1	1.93013	0.876586	-1.05354	6.03761e-168	1.37416e-163
Ddit4l	1.19063	0.139431	-1.0512	3.66381e-180	8.33884e-176
Park2	1.99507	0.949057	-1.04601	1.14915e-159	2.61546e-155
Sgcd	3.21691	2.17475	-1.04216	6.83017e-176	1.55455e-171
Tmtc1	3.13259	2.09079	-1.0418	2.16265e-192	4.9222e-188
Cdon	1.73746	0.695991	-1.04147	8.08919e-155	1.8411e-150
Gm12158	1.24426	0.207424	-1.03684	5.14537e-185	1.17109e-180
Frmpd4	2.27763	1.24381	-1.03382	1.13084e-82	2.57379e-78
4930517O19Rik	1.25136	0.218811	-1.03255	9.83292e-192	2.23797e-187
Copz2	1.50736	0.479053	-1.02831	3.71794e-170	8.46203e-166
Zfhx4	3.15119	2.1322	-1.01899	1.65915e-138	3.77623e-134
Itga11	1.44731	0.428326	-1.01898	4.06091e-181	9.24263e-177
Tcf7l2	2.66034	1.64207	-1.01827	2.56568e-161	5.83949e-157
Mthfs	1.32922	0.311006	-1.01821	1.01809e-177	2.31718e-173
Ptprm	2.8596	1.84189	-1.01771	5.88101e-178	1.33852e-173
Aff3	3.63383	2.62274	-1.01109	2.33004e-214	5.30318e-210
Col26a1	1.50018	0.49514	-1.00504	3.24997e-154	7.39694e-150
Marcks	2.14155	1.13665	-1.0049	5.7984e-137	1.31972e-132
Supt3	1.78481	0.781846	-1.00296	2.0557e-155	4.67878e-151
St3gal5	1.25947	0.258586	-1.00089	2.41734e-181	5.50186e-177
Ddx3y	0.015702	0.995903	0.980201	4.10452e-74	9.34188e-70
Mctp2	0.0613699	1.06327	1.0019	3.63209e-68	8.26664e-64
Ldha	0.410031	1.41369	1.00366	1.97425e-62	4.49339e-58
Eif2s3y	0	1.00667	1.00667	2.83992e-80	6.46365e-76
Fgf2	0.690917	1.70661	1.01569	1.07291e-36	2.44194e-32
Smim3	0.128433	1.1465	1.01807	2.31475e-68	5.26837e-64
Tox	1.03949	2.06076	1.02127	6.45783e-22	1.4698e-17
Rgs7	0.361959	1.38911	1.02715	2.56707e-31	5.84265e-27
Lama4	2.24113	3.27731	1.03617	1.23098e-100	2.8017e-96
Mcc	2.27734	3.31414	1.03679	1.22859e-34	2.79628e-30
Rasal2	1.47796	2.51994	1.04198	1.95409e-67	4.44752e-63
Sdc4	0.247634	1.29021	1.04258	6.24397e-71	1.42113e-66
Psd3	1.32579	2.37095	1.04516	1.23792e-45	2.81751e-41
Cdh6	1.6616	2.70688	1.04528	1.98364e-29	4.51476e-25
Ank3	0.833242	1.88067	1.04743	4.43856e-32	1.01022e-27
Lpgat1	0.905047	1.95321	1.04816	4.31768e-57	9.82703e-53
Sned1	2.05416	3.10307	1.04891	4.80869e-60	1.09446e-55
Adamts15	0.263008	1.31804	1.05503	8.98348e-66	2.04464e-61
Fbxl5	0.743081	1.79949	1.0564	5.45317e-70	1.24114e-65
Ccnl1	1.033	2.09357	1.06056	4.17977e-74	9.51315e-70
Tanc1	0.77529	1.84298	1.06769	8.38809e-63	1.90913e-58
Gclc	1.12727	2.19652	1.06925	5.52905e-55	1.25841e-50
Sptssb	0.0390369	1.10895	1.06991	7.97068e-69	1.81413e-64
Pak3	0.881878	1.95199	1.07011	1.03445e-20	2.3544e-16
Hsph1	0.195144	1.26592	1.07078	3.76904e-67	8.57834e-63
Sorbs1	0.580704	1.65204	1.07133	4.02295e-37	9.15624e-33
Adam22	1.24112	2.31671	1.07559	1.03661e-31	2.35931e-27
Aspg	0.0222438	1.10344	1.08119	6.5008e-85	1.47958e-80
Gm48228	1.08279	2.16447	1.08168	4.48789e-65	1.02144e-60
Alas1	0.382372	1.46549	1.08312	2.01133e-43	4.57779e-39
Slco3a1	0.445716	1.53712	1.0914	3.73363e-54	8.49774e-50
Arid5b	2.05887	3.15394	1.09507	1.43106e-69	3.25709e-65
Gsr	0.486504	1.58837	1.10186	1.90837e-61	4.34346e-57
Elf2	0.453489	1.55644	1.10295	2.58614e-60	5.88605e-56
Srgap1	1.77158	2.87474	1.10316	1.59428e-73	3.62859e-69
Pabpc1	0.843921	1.95184	1.10792	1.22908e-74	2.79738e-70
Ampd3	0.19863	1.30714	1.10851	3.20827e-80	7.30202e-76
Herc4	1.02307	2.1328	1.10972	1.77369e-56	4.03693e-52
Ccl7	0.121857	1.23283	1.11097	7.28033e-77	1.657e-72
Phf24	0.0223007	1.1366	1.11429	4.84764e-77	1.10332e-72
Cxcl5	0.019847	1.13658	1.11673	2.64937e-59	6.02996e-55
Ier3	0.393306	1.511	1.1177	2.26815e-82	5.1623e-78
Bcl3	0.0405553	1.15835	1.1178	4.9971e-100	1.13734e-95
Tmem100	0.712893	1.83575	1.12286	3.14997e-58	7.16933e-54
Malt1	0.203732	1.32812	1.12439	8.29087e-54	1.887e-49
Heg1	0.972474	2.1027	1.13022	1.05467e-67	2.40044e-63
Adcy2	2.10016	3.23074	1.13058	1.24954e-87	2.84396e-83
Uap1	0.336328	1.46876	1.13243	1.4375e-49	3.27175e-45
Pmvk	0.115975	1.25192	1.13594	5.75141e-62	1.30902e-57
Gm42418	3.29189	4.42899	1.13711	2.20794e-96	5.02526e-92
Klf9	1.57561	2.71501	1.1394	8.623e-106	1.9626e-101
Pik3ap1	0.224397	1.36641	1.14201	8.45925e-64	1.92533e-59
March3	2.07585	3.22041	1.14456	4.50916e-69	1.02629e-64
Riok3	0.89072	2.03706	1.14634	1.99145e-86	4.53254e-82
Rgs6	0.941003	2.08953	1.14853	8.53963e-08	0.00194362
Ptprj	0.894852	2.04348	1.14863	3.1602e-49	7.19262e-45
Parm1	0.421789	1.57245	1.15066	2.41805e-44	5.50348e-40
Mycbp2	2.78022	3.93682	1.1566	4.93935e-146	1.1242e-141
Tnc	0.571391	1.73059	1.1592	4.14078e-24	9.42442e-20
Cxcl14	0.19264	1.35675	1.16411	7.67084e-65	1.74588e-60
Hmga2	0.025476	1.19082	1.16535	5.70599e-70	1.29868e-65
Rffl	0.40121	1.5681	1.16689	1.37792e-70	3.13615e-66
Ifitm1	0.216327	1.38476	1.16844	8.61187e-97	1.96006e-92
Vdr	0.0376277	1.20872	1.17109	6.59741e-78	1.50157e-73
Clec2d	0.71561	1.89174	1.17613	2.51742e-86	5.72966e-82
Ccl2	0.0733455	1.26088	1.18753	3.21083e-74	7.30785e-70
Gm47283	1.75124	2.93937	1.18813	6.54833e-96	1.4904e-91
Anxa3	0.702004	1.89294	1.19094	2.29823e-65	5.23078e-61
Rgcc	0.29442	1.48995	1.19553	5.86653e-90	1.33522e-85
Il13ra1	0.106935	1.30481	1.19787	3.75123e-95	8.5378e-91
Jmjd1c	2.56301	3.76526	1.20225	1.34235e-152	3.05518e-148
Synpo	0.931531	2.13523	1.2037	1.01208e-93	2.3035e-89
Arhgap24	1.22999	2.43569	1.20571	6.70794e-78	1.52673e-73
Igf1r	1.96754	3.17522	1.20768	7.17058e-94	1.63202e-89
Lox	0.839506	2.04917	1.20967	2.51362e-82	5.721e-78
Vipr2	0.106617	1.32331	1.2167	6.88699e-77	1.56748e-72
Slc2a13	1.73065	2.95441	1.22376	4.56487e-51	1.03897e-46
Efna5	3.43861	4.66549	1.22688	4.11966e-92	9.37634e-88
Klhl2	0.530581	1.76745	1.23687	5.83476e-88	1.32799e-83
Plod2	0.598851	1.8477	1.24885	6.85857e-79	1.56101e-74
Rims2	0.096406	1.34843	1.25202	4.54488e-85	1.03441e-80
Slc7a11	0.335036	1.59564	1.2606	1.55958e-41	3.54961e-37
Dlg1	2.21485	3.47802	1.26317	1.77486e-130	4.03958e-126
Irak3	0.25723	1.52537	1.26814	2.90186e-94	6.60463e-90
Diaph2	1.82218	3.09924	1.27707	1.75997e-148	4.00569e-144
Sorcs1	0.79652	2.07372	1.2772	8.20842e-29	1.86824e-24
Abcb1b	0.113447	1.39188	1.27843	1.86135e-49	4.23643e-45
Acaca	1.52729	2.82346	1.29617	1.55268e-95	3.53389e-91
Cd200	0.411778	1.71099	1.29922	1.40973e-99	3.20854e-95
Rbbp8	0.652619	1.95723	1.30461	2.04013e-83	4.64333e-79
Pam	1.85918	3.1641	1.30493	1.56594e-119	3.56409e-115
Rhoj	1.31821	2.62573	1.30752	3.19424e-46	7.2701e-42
Errfi1	1.59141	2.90093	1.30953	1.29586e-100	2.94937e-96
Clic4	1.24802	2.55911	1.31109	6.08615e-90	1.38521e-85
Ifitm3	0.536006	1.85221	1.31621	4.80852e-110	1.09442e-105
Fmo1	1.39182	2.7119	1.32008	9.33627e-31	2.12493e-26
Il6st	1.25928	2.57981	1.32053	4.11239e-119	9.35981e-115
Rnf150	0.331602	1.6596	1.328	9.93143e-86	2.26039e-81
Scara5	0.103182	1.43272	1.32953	1.7585e-87	4.00235e-83
Prok2	0.00258687	1.34782	1.34523	1.30279e-106	2.96515e-102
Hif1a	1.18521	2.53055	1.34534	1.17116e-95	2.66555e-91
Aff1	0.474877	1.82753	1.35265	2.70207e-92	6.14992e-88
Prkca	2.51814	3.87232	1.35418	1.39394e-107	3.17262e-103
Fndc3b	2.99908	4.35462	1.35553	2.49634e-306	5.68168e-302
Porcn	0.148505	1.51147	1.36296	1.65679e-84	3.77086e-80
Dgkh	0.938086	2.31218	1.37409	2.00623e-100	4.56617e-96
Gm29554	0.184378	1.56821	1.38383	3.39947e-103	7.7372e-99
Prkd1	1.31978	2.70603	1.38624	1.85924e-58	4.23163e-54
Cebpd	0.681802	2.06923	1.38743	2.70935e-129	6.16648e-125
Hacd2	0.472075	1.86675	1.39468	1.60571e-65	3.6546e-61
Dnah7a	0.134798	1.53329	1.3985	1.1088e-133	2.52364e-129
Cyp7b1	0.845367	2.25386	1.40849	3.87353e-58	8.81616e-54
Etv6	1.785	3.20867	1.42366	1.57256e-157	3.57914e-153
Csgalnact1	1.96206	3.38966	1.4276	2.86825e-97	6.52814e-93
Arl15	2.45958	3.88725	1.42767	1.04494e-194	2.37828e-190
Abcc4	0.449746	1.88419	1.43444	6.87199e-114	1.56406e-109
Casp4	0.0433998	1.48977	1.44637	1.66843e-124	3.79735e-120
Uty	0.011287	1.45836	1.44707	4.02448e-128	9.15971e-124
Eva1c	0.283937	1.73182	1.44789	3.1861e-114	7.25157e-110
Bicd1	0.225379	1.67906	1.45368	7.01249e-72	1.59604e-67
Serpine2	0.431861	1.88737	1.45551	2.3959e-79	5.45307e-75
Nfkb1	1.47422	2.93077	1.45654	5.07365e-116	1.15476e-111
Serpina3n	0	1.48502	1.48502	3.10994e-128	7.07822e-124
Pde7b	2.88773	4.37952	1.49179	9.58031e-155	2.18048e-150
Zfp385b	1.34347	2.84671	1.50324	5.67586e-108	1.29183e-103
Hk2	0.0756607	1.58188	1.50622	1.4217e-114	3.2358e-110
Slc1a3	1.60951	3.11913	1.50962	2.32555e-106	5.29295e-102
Pde3a	1.96486	3.47765	1.51278	2.39945e-161	5.46114e-157
Pvt1	0.255568	1.76896	1.51339	4.70316e-102	1.07044e-97
Smoc2	1.07875	2.60497	1.52622	2.48852e-121	5.66387e-117
Stat3	1.4166	2.94338	1.52678	4.97984e-200	1.13341e-195
Chrm3	1.80459	3.33208	1.52749	1.42137e-81	3.23503e-77
Ptchd4	1.19634	2.72531	1.52897	1.74458e-115	3.97067e-111
Mark1	1.33343	2.86347	1.53003	1.81275e-145	4.12581e-141
Tnip1	0.35782	1.9035	1.54568	2.86747e-116	6.52635e-112
Lvrn	0.0608904	1.6132	1.55231	3.20954e-104	7.30492e-100
Gbp5	0.0550973	1.61153	1.55643	5.39851e-93	1.2287e-88
Lrp1	2.184	3.74614	1.56215	1.05044e-307	2.39081e-303
Cfh	0.835414	2.39935	1.56394	9.07151e-101	2.06468e-96
Gng12	1.25067	2.81907	1.5684	3.54749e-167	8.07409e-163
Cyp1b1	0.714379	2.28478	1.5704	1.24149e-140	2.82564e-136
Cacnb2	0.64582	2.22282	1.57701	2.69321e-63	6.12974e-59
Cd44	0.206414	1.79169	1.58528	2.91575e-107	6.63624e-103
Rnf125	0.0478058	1.63826	1.59045	1.42188e-140	3.23621e-136
Col4a2	1.53125	3.14266	1.61142	6.74523e-206	1.53521e-201
Tead1	2.43293	4.04506	1.61213	5.55562e-251	1.26446e-246
Relb	0.297507	1.92064	1.62313	9.75598e-155	2.22046e-150
Sulf1	2.11299	3.74826	1.63527	1.44288e-196	3.28398e-192
Ptx3	0.244547	1.88965	1.64511	9.08762e-102	2.06834e-97
Icam1	0.373105	2.0192	1.6461	1.12468e-127	2.55978e-123
Birc2	0.84452	2.4909	1.64638	1.62445e-144	3.69725e-140
Grk5	0.816781	2.47068	1.65389	1.59065e-132	3.62031e-128
Acsl4	0.118385	1.7777	1.65931	2.62987e-131	5.98558e-127
Pld1	1.18874	2.84977	1.66103	6.22505e-158	1.41682e-153
Xdh	0.0663146	1.73629	1.66998	2.37958e-157	5.41592e-153
Itgb8	0.11249	1.78876	1.67627	1.95191e-129	4.44256e-125
Esyt2	1.36074	3.0417	1.68096	4.39943e-186	1.00131e-181
Sntb1	0.169958	1.85206	1.6821	2.51532e-83	5.72486e-79
Gm26917	1.99913	3.68561	1.68648	2.04785e-149	4.6609e-145
Col4a1	1.63226	3.32794	1.69569	2.36024e-240	5.37191e-236
Cblb	1.08099	2.77942	1.69843	1.64134e-178	3.73569e-174
Steap4	0.366249	2.07507	1.70882	2.81205e-147	6.40023e-143
Fmnl2	2.37833	4.12943	1.75109	1.59972e-216	3.64097e-212
Slc7a2	1.02702	2.78008	1.75306	1.16625e-146	2.65438e-142
Glis3	1.35184	3.10525	1.7534	1.40262e-114	3.19235e-110
Cxcl12	1.36631	3.12938	1.76307	1.23019e-228	2.79992e-224
Ugdh	0.460077	2.22728	1.7672	1.12675e-94	2.56447e-90
Ngf	0.19546	1.96668	1.77122	1.32725e-112	3.02081e-108
Rnd1	0.0116767	1.78401	1.77233	2.88114e-138	6.55747e-134
Runx1	0.401632	2.18047	1.77884	1.74182e-174	3.96437e-170
Nfkbia	0.270876	2.06324	1.79236	1.63432e-190	3.71971e-186
Sod2	0.160678	1.96562	1.80495	1.05982e-202	2.41215e-198
Gm2163	0.0908972	1.89817	1.80727	3.31362e-122	7.5418e-118
Syne1	1.27779	3.09639	1.8186	2.59335e-138	5.90246e-134
Mdga2	0.471845	2.29941	1.82756	2.25553e-93	5.13358e-89
Rock2	1.81487	3.66531	1.85044	3.79295e-220	8.63277e-216
Ptpn2	1.02728	2.88447	1.85719	7.00614e-190	1.5946e-185
Birc3	0.273824	2.16091	1.88709	3.7656e-165	8.57051e-161
Rad51b	1.00865	2.89762	1.88898	9.49351e-106	2.16072e-101
Plcb1	1.57372	3.46375	1.89003	9.26502e-135	2.10872e-130
Abi1	1.22385	3.11811	1.89426	3.14029e-258	7.1473e-254
Pappa2	0.37193	2.28658	1.91465	1.20348e-102	2.73912e-98
Tgfbr3	2.75792	4.71123	1.95331	0	0
Cyyr1	0.0929809	2.04963	1.95665	9.74224e-160	2.21733e-155
Gm17268	0.106205	2.06981	1.96361	1.81735e-77	4.13629e-73
Timp1	0.188932	2.16012	1.97119	3.38205e-220	7.69755e-216
Kif21a	0.378383	2.35655	1.97817	2.26879e-205	5.16377e-201
Fgf13	0.227179	2.21004	1.98286	2.82293e-72	6.425e-68
Neat1	0.706416	2.69663	1.99022	4.54739e-187	1.03499e-182
Gpm6b	1.59168	3.58225	1.99057	9.08164e-254	2.06698e-249
Prmt8	1.57251	3.57602	2.00351	4.76933e-266	1.0855e-261
Camk4	0.277024	2.30043	2.0234	2.94478e-102	6.70233e-98
9530059O14Rik	0.00230387	2.03147	2.02917	2.24807e-102	5.11661e-98
Pdgfra	0.812997	2.84996	2.03696	1.59847e-211	3.63813e-207
Pde4b	0.751296	2.79274	2.04144	3.70371e-202	8.42965e-198
Pappa	1.7555	3.79715	2.04165	3.0537e-110	6.95023e-106
Pdlim5	1.53965	3.60207	2.06242	4.76771e-216	1.08513e-211
Cpne8	0.56544	2.6464	2.08096	7.67088e-241	1.74589e-236
Lrmda	0.58935	2.68983	2.10048	9.76667e-137	2.22289e-132
Sbno2	0.379234	2.48379	2.10456	7.01616e-247	1.59688e-242
Dennd4a	1.53692	3.64185	2.10493	3.43883e-233	7.82678e-229
Chst11	0.911733	3.01951	2.10778	3.1499e-209	7.16917e-205
Gm16685	0.0263308	2.14874	2.12241	8.18555e-104	1.86303e-99
Osbpl3	0.0659154	2.22456	2.15864	1.17766e-216	2.68036e-212
Kcnq5	1.50822	3.67232	2.16409	5.55208e-128	1.26365e-123
Ctps	0.453965	2.67496	2.221	3.91528e-278	8.91118e-274
Susd6	1.35721	3.58034	2.22313	0	0
Osmr	0.25129	2.48805	2.23676	2.62216e-283	5.96804e-279
Nrg3	2.59895	4.87114	2.27219	8.41113e-243	1.91437e-238
Gm20400	0.299027	2.57458	2.27555	8.18187e-230	1.86219e-225
Cxcl1	0.00168471	2.28301	2.28132	2.28158e-211	5.19287e-207
Fkbp5	0.260023	2.55166	2.29164	1.20297e-276	2.73796e-272
Lbp	0.396122	2.7121	2.31598	1.02824e-233	2.34027e-229
Fgf7	0.7261	3.11219	2.38609	2.84044e-259	6.46485e-255
Ism1	0.318911	2.73101	2.4121	2.05734e-211	4.68251e-207
Fth1	1.37543	3.81612	2.44069	0	0
Lcn2	0.00783502	2.45767	2.44984	0	0
Serping1	1.00188	3.48102	2.47914	0	0
Csf3	0	2.58674	2.58674	6.13435e-251	1.39618e-246
Ap4e1	0.72338	3.4134	2.69002	0	0
Slc39a14	1.4621	4.17026	2.70816	0	0
Il1r1	0.411631	3.12526	2.71362	8.2052e-251	1.8675e-246
Prg4	0.0124959	2.76278	2.75028	3.60458e-147	8.20403e-143
Apod	0.513844	3.32251	2.80866	0	0
Olfr1033	0.87416	3.6829	2.80874	0	0
Il6	0.0230971	2.88271	2.85961	4.53045e-249	1.03113e-244
Cacna1d	1.12282	3.99995	2.87713	0	0
4930578G10Rik	0.0239337	2.90496	2.88103	9.72307e-216	2.21297e-211
Sdk1	1.23136	4.18411	2.95275	1.72647e-298	3.92944e-294
Spidr	1.07139	4.03083	2.95944	0	0
Pde4d	2.1422	5.14427	3.00207	0	0
Zbtb16	0.0556049	3.18297	3.12737	0	0
Ttr	0.144532	3.33012	3.18559	0	0
Cp	0.915506	4.1718	3.25629	0	0
Mt2	0.049314	3.45527	3.40595	0	0
Pde10a	0.859021	4.37469	3.51567	0	0
Saa3	0.0151149	3.58189	3.56678	0	0
Kiz	0.495394	4.48755	3.99216	0	0
Hdac9	1.03762	5.13931	4.10169	0	0
Mt1	0.359459	4.56788	4.20842	0	0

## Sheet: Fibroblast dura 2
gene	log2(average expression control + 1)	log2(average expression infected + 1)	avg_log2FC	p_val	p_val_adj
Col14a1	3.7945	1.12818	-2.66633	0	0
Xist	5.48499	3.05967	-2.42532	0	0
Slc6a6	3.41369	1.02192	-2.39177	0	0
Pid1	4.47571	2.09506	-2.38066	0	0
Tsix	2.71057	0.439718	-2.27085	0	0
Cdh18	2.87288	0.764456	-2.10843	6.5811e-178	1.49786e-173
Ednra	2.5525	0.477803	-2.0747	0	0
Gnas	5.01153	2.94184	-2.06969	0	0
Svil	3.80544	1.77445	-2.031	0	0
Hmcn1	3.819	1.82331	-1.99569	4.46439e-173	1.0161e-168
Rab30	2.39644	0.403169	-1.99327	0	0
Mmp16	3.66955	1.68707	-1.98248	1.1659e-203	2.65358e-199
Adamts12	3.01852	1.07036	-1.94816	4.82563e-279	1.09831e-274
Adam23	2.57297	0.665214	-1.90776	3.15063e-233	7.17083e-229
Epha3	3.77985	1.87357	-1.90628	4.12031e-210	9.37782e-206
Fhod3	2.18418	0.314053	-1.87013	5.18233e-257	1.1795e-252
Srgap3	2.56041	0.710038	-1.85037	0	0
Spats2l	2.33419	0.538784	-1.7954	0	0
Ptn	3.36627	1.59964	-1.76662	1.38454e-278	3.15121e-274
Slc24a3	3.0269	1.26967	-1.75722	1.12999e-227	2.57186e-223
Lama2	3.00655	1.25507	-1.75148	1.13313e-291	2.57901e-287
Auts2	6.07645	4.33405	-1.7424	0	0
Col8a1	3.54137	1.80725	-1.73412	7.07036e-144	1.60921e-139
Abi3bp	2.69272	0.981201	-1.71152	1.36643e-146	3.11e-142
Gxylt2	2.52415	0.813399	-1.71075	1.89589e-275	4.31505e-271
Robo2	3.54686	1.86811	-1.67876	9.56594e-188	2.17721e-183
Pcdh7	4.39218	2.71788	-1.6743	3.82632e-246	8.70869e-242
Cadm1	2.94582	1.30948	-1.63634	2.30374e-196	5.24331e-192
Gulp1	3.97285	2.34067	-1.63217	2.80325e-295	6.3802e-291
Igf2r	2.41936	0.796584	-1.62277	7.62776e-274	1.73608e-269
Caln1	1.76217	0.145155	-1.61701	2.87121e-160	6.53487e-156
Unc5c	3.90031	2.28502	-1.6153	5.13166e-264	1.16797e-259
Airn	4.85681	3.24568	-1.61113	0	0
Col1a1	5.19979	3.60402	-1.59577	2.77595e-293	6.31806e-289
Col8a2	2.38121	0.804604	-1.57661	2.10708e-228	4.79571e-224
Thbs2	2.45475	0.885928	-1.56883	3.92718e-254	8.93826e-250
Asap1	3.71287	2.16754	-1.54533	2.5551e-263	5.8154e-259
Pbx1	4.67218	3.14074	-1.53144	3.90298e-296	8.88318e-292
Col1a2	5.79128	4.2705	-1.52078	0	0
Lgr5	2.05931	0.546244	-1.51307	6.18296e-52	1.40724e-47
Sncaip	2.02845	0.520444	-1.508	1.23855e-205	2.81894e-201
Csrp2	2.10792	0.605885	-1.50203	1.23941e-205	2.8209e-201
Foxp2	5.42741	3.92932	-1.49809	0	0
Epha5	1.93265	0.44172	-1.49093	1.93706e-165	4.40876e-161
Prdm6	3.6119	2.13009	-1.48182	1.35892e-219	3.09291e-215
Plxna4	1.92438	0.442887	-1.4815	9.08201e-192	2.06707e-187
Fras1	1.70876	0.236004	-1.47275	2.67534e-173	6.08906e-169
Map1b	2.4527	0.991081	-1.46161	8.33178e-142	1.89631e-137
Mfap4	2.64607	1.18593	-1.46014	3.98174e-198	9.06243e-194
Dlc1	3.18963	1.75188	-1.43775	4.12817e-233	9.39571e-229
Klf12	2.6703	1.24933	-1.42097	3.26766e-166	7.43719e-162
Dock4	3.68815	2.26737	-1.42079	4.30977e-239	9.80903e-235
Kcnq1	2.42334	1.00628	-1.41706	2.82497e-194	6.42964e-190
Gm47271	1.96522	0.559008	-1.40621	1.8247e-171	4.15302e-167
Aff2	2.52553	1.13707	-1.38846	2.35402e-174	5.35774e-170
Gm42439	1.97189	0.596337	-1.37555	8.28584e-192	1.88586e-187
Zfhx4	3.73749	2.36628	-1.37121	1.00542e-227	2.28833e-223
Phactr2	2.38719	1.02117	-1.36602	1.0068e-158	2.29148e-154
Astn2	2.32877	0.980084	-1.34869	1.92905e-113	4.39052e-109
Mpped2	2.80162	1.47402	-1.3276	4.73163e-169	1.07692e-164
Nhsl1	1.88428	0.562779	-1.3215	3.71799e-166	8.46215e-162
Zfp521	3.4171	2.11814	-1.29896	1.48528e-199	3.3805e-195
Aspn	1.70909	0.412389	-1.2967	5.02408e-149	1.14348e-144
Matn4	2.46832	1.17336	-1.29496	2.78931e-161	6.34847e-157
Tpm1	3.08462	1.7954	-1.28922	4.21533e-136	9.59408e-132
Adamts6	2.39576	1.11632	-1.27944	2.35983e-153	5.37098e-149
Igdcc4	1.5956	0.316347	-1.27925	4.07368e-196	9.2717e-192
Fam155a	2.13871	0.862788	-1.27592	2.54703e-61	5.79704e-57
Nfix	2.45959	1.1929	-1.26669	7.86261e-207	1.78953e-202
Gm20721	1.50748	0.243945	-1.26354	1.74143e-175	3.9635e-171
Mid1	4.54987	3.29401	-1.25587	1.39527e-119	3.17563e-115
Slc4a10	2.39333	1.14248	-1.25084	1.17863e-40	2.68257e-36
Plagl1	3.09537	1.85308	-1.24229	4.12813e-177	9.39561e-173
Nrk	1.95249	0.718376	-1.23411	1.39224e-155	3.16874e-151
Ptprd	5.55483	4.32627	-1.22856	4.6562e-229	1.05975e-224
A230057D06Rik	1.74115	0.515941	-1.22521	1.09297e-141	2.48759e-137
Ttc3	2.61594	1.39299	-1.22294	1.98709e-185	4.52262e-181
Tenm4	2.24343	1.02127	-1.22216	2.69073e-113	6.1241e-109
Sema3c	2.49576	1.2756	-1.22016	3.89482e-124	8.86461e-120
Xylt1	1.90694	0.686932	-1.22001	5.47467e-170	1.24603e-165
Sesn3	2.28589	1.06727	-1.21862	9.54023e-155	2.17136e-150
Mob3b	1.48301	0.265743	-1.21727	1.01501e-138	2.31017e-134
Rora	4.72939	3.51368	-1.2157	1.20551e-206	2.74375e-202
Plpp3	3.537	2.32162	-1.21537	4.45995e-137	1.01508e-132
Nlgn1	3.59026	2.38249	-1.20776	2.62153e-148	5.96659e-144
Ttc28	2.92646	1.72236	-1.2041	6.4118e-180	1.45933e-175
Sulf2	1.88697	0.683808	-1.20316	1.00067e-157	2.27752e-153
Cdkn1c	1.84934	0.653914	-1.19543	1.27863e-150	2.91016e-146
Hs3st5	1.83958	0.647924	-1.19166	1.75394e-101	3.99197e-97
Ldb2	1.83911	0.659683	-1.17943	4.80037e-109	1.09256e-104
Frmd4a	2.17346	0.99575	-1.17771	1.14522e-151	2.60652e-147
Palld	3.45985	2.29029	-1.16956	1.99837e-110	4.54828e-106
A630089N07Rik	2.26182	1.09243	-1.16939	7.37296e-168	1.67809e-163
Magi2	3.17551	2.00848	-1.16703	2.54531e-128	5.79314e-124
Ogn	1.87655	0.71405	-1.1625	1.78511e-146	4.06291e-142
Ptprm	2.62514	1.46577	-1.15937	1.2095e-164	2.75282e-160
Foxd1	2.29419	1.13553	-1.15867	7.77509e-160	1.76961e-155
Sgcd	3.73005	2.5864	-1.14365	6.87414e-176	1.56455e-171
Smarca2	2.34324	1.20501	-1.13823	1.0542e-164	2.39936e-160
Robo1	3.42406	2.30436	-1.1197	1.00753e-140	2.29314e-136
Eya1	2.84066	1.72306	-1.11759	6.6325e-145	1.50956e-140
Neo1	3.26031	2.14637	-1.11394	8.99618e-146	2.04753e-141
Gria1	1.36757	0.256952	-1.11062	1.2435e-111	2.8302e-107
Fam110b	1.76164	0.655133	-1.10651	4.25166e-137	9.67678e-133
B3galt1	2.49038	1.38473	-1.10565	1.87601e-77	4.2698e-73
Copz2	1.58299	0.481311	-1.10168	1.36909e-156	3.11604e-152
Dkk2	1.58118	0.480275	-1.10091	7.03592e-64	1.60138e-59
Slc23a2	3.38562	2.28658	-1.09904	8.0453e-95	1.83111e-90
Zfpm2	2.11661	1.01835	-1.09826	1.77912e-107	4.04928e-103
Adamts18	1.12251	0.024572	-1.09794	1.22682e-75	2.79224e-71
Tnfrsf19	1.47569	0.389174	-1.08652	1.48787e-100	3.3864e-96
Col27a1	1.93448	0.858448	-1.07604	4.1902e-122	9.53689e-118
Rnf121	1.82786	0.755534	-1.07233	1.3609e-114	3.0974e-110
1500015O10Rik	1.93206	0.86844	-1.06362	1.58916e-99	3.61693e-95
Sipa1l1	2.70566	1.64721	-1.05844	4.76529e-148	1.08458e-143
St3gal5	1.40548	0.347978	-1.0575	9.91723e-152	2.25716e-147
Mfap2	1.44547	0.38805	-1.05742	3.16952e-129	7.21383e-125
Cpxm1	1.46407	0.408035	-1.05604	2.34388e-146	5.33468e-142
Park2	1.854	0.802479	-1.05152	2.44648e-116	5.56818e-112
Map2k6	1.11761	0.0757717	-1.04184	3.91104e-142	8.90152e-138
Map2	1.28405	0.251445	-1.0326	1.70977e-115	3.89144e-111
Rasgrf1	1.08142	0.052089	-1.02933	1.93138e-122	4.39583e-118
Adamtsl1	3.37498	2.34614	-1.02884	8.30181e-114	1.88949e-109
Mecom	3.30638	2.28011	-1.02626	1.42728e-66	3.24848e-62
Gm29478	1.32802	0.307317	-1.02071	2.10743e-90	4.79651e-86
Fam129a	1.38905	0.368399	-1.02066	4.60656e-113	1.04845e-108
Ppp2r2b	1.38102	0.36213	-1.0189	1.70521e-88	3.88106e-84
Cpq	2.4323	1.41404	-1.01826	1.32133e-120	3.00734e-116
Col11a1	3.93149	2.91725	-1.01424	3.22253e-138	7.33449e-134
Lmo7	1.66782	0.656828	-1.011	1.45821e-106	3.31889e-102
Dner	1.11748	0.109659	-1.00782	2.02421e-81	4.60711e-77
Xkr4	1.98388	0.977299	-1.00658	4.3186e-83	9.82913e-79
Foxn3	3.55392	2.55304	-1.00088	3.02155e-139	6.87705e-135
Abtb2	1.37298	0.372195	-1.00079	7.65407e-116	1.74207e-111
Eif2s3y	0	0.952588	0.952588	4.96532e-64	1.13011e-59
Map4k4	2.14932	3.15374	1.00442	2.12647e-67	4.83985e-63
Rffl	0.502107	1.50765	1.00554	6.33669e-38	1.44223e-33
Nek6	0.590195	1.61139	1.02119	6.84199e-44	1.55724e-39
Cpe	0.400982	1.42464	1.02365	3.76553e-34	8.57036e-30
Ngf	0.351211	1.37572	1.02451	2.96931e-31	6.75814e-27
Sav1	0.603134	1.63156	1.02842	2.94212e-44	6.69625e-40
Fgf13	0.475513	1.50747	1.03196	7.0215e-18	1.59809e-13
Chd7	0.124595	1.16075	1.03615	2.37926e-55	5.4152e-51
Gimap6	0.121964	1.16414	1.04217	1.81477e-39	4.13041e-35
Lvrn	0.0120594	1.06686	1.0548	4.78916e-53	1.09001e-48
Syne1	2.42515	3.48872	1.06358	3.89831e-32	8.87256e-28
Ccnl1	1.16398	2.22808	1.06411	4.72009e-45	1.07429e-40
Rbms3	3.80712	4.87913	1.072	5.0918e-105	1.15889e-100
Pcsk5	3.09399	4.16724	1.07325	1.28773e-57	2.93088e-53
Gfra1	0.186133	1.25978	1.07365	2.61636e-36	5.95483e-32
Mindy3	0.716842	1.79227	1.07543	2.21957e-40	5.05173e-36
Ccl7	0.0792549	1.15602	1.07676	3.59731e-58	8.18749e-54
Heg1	1.24144	2.31868	1.07724	1.7665e-49	4.02055e-45
Gm48228	0.941775	2.02014	1.07837	5.13632e-36	1.16903e-31
Tnfaip2	0.0479283	1.12631	1.07838	2.26162e-55	5.14745e-51
Ctgf	1.01673	2.09741	1.08068	9.82837e-24	2.23694e-19
Uap1	0.431206	1.51278	1.08157	1.62649e-30	3.70188e-26
Mcc	2.18023	3.26223	1.08201	7.84217e-22	1.78488e-17
Cacnb2	1.64508	2.73331	1.08824	5.58212e-26	1.27049e-21
Gadd45g	0.0718943	1.16023	1.08833	3.17236e-63	7.22029e-59
Dctn4	1.37215	2.46231	1.09016	5.70566e-42	1.29861e-37
Ddx3y	0.0214234	1.11491	1.09349	6.62769e-70	1.50846e-65
Rhoj	1.62099	2.72665	1.10566	3.97881e-33	9.05577e-29
Ror1	2.27643	3.38761	1.11117	1.78488e-50	4.0624e-46
Jmjd1c	2.93854	4.05243	1.11389	4.31609e-135	9.82343e-131
Stat3	1.75833	2.87586	1.11753	1.04237e-87	2.37244e-83
Thbs1	1.21537	2.33708	1.12171	5.36905e-25	1.222e-20
Brinp1	0.128472	1.25209	1.12362	2.76663e-28	6.29685e-24
Cfh	1.77933	2.90398	1.12464	2.60917e-42	5.93847e-38
Rras2	0.664609	1.79588	1.13127	1.87648e-43	4.27087e-39
Slc7a2	1.18459	2.32123	1.13664	2.81084e-40	6.39748e-36
Gcnt2	0.137281	1.27412	1.13684	8.85126e-60	2.01455e-55
Samhd1	0.559816	1.69696	1.13714	2.15335e-30	4.90103e-26
Hsph1	0.305108	1.45042	1.14531	5.32371e-61	1.21168e-56
Casp4	0.0461229	1.19292	1.14679	9.80542e-72	2.23171e-67
Rnf125	0.0317751	1.18078	1.14901	2.16253e-71	4.92193e-67
Gm2163	0.0632257	1.2183	1.15508	8.31534e-56	1.89257e-51
Rbbp8	0.658827	1.81521	1.15638	1.26117e-47	2.87043e-43
Pabpc1	0.765843	1.92565	1.15981	4.62572e-58	1.05281e-53
Clic4	1.07948	2.2416	1.16212	5.56518e-45	1.26663e-40
Gm26917	2.09507	3.25907	1.164	2.75205e-59	6.26367e-55
Ddi2	0.9032	2.06724	1.16404	3.05543e-56	6.95417e-52
Msi2	2.36224	3.52858	1.16634	2.13544e-108	4.86026e-104
A730049H05Rik	0.720939	1.88905	1.16811	6.85311e-25	1.55977e-20
Prkd1	1.44636	2.61554	1.16918	1.25226e-33	2.85015e-29
Acvr1b	0.243345	1.4214	1.17806	1.02897e-68	2.34194e-64
Gsr	0.580342	1.76231	1.18197	1.68158e-54	3.82728e-50
Gng12	1.39924	2.58339	1.18415	4.34985e-68	9.90025e-64
Nedd4l	0.857644	2.04308	1.18544	5.92277e-40	1.34802e-35
1700018L02Rik	0.0908302	1.28391	1.19308	1.07424e-44	2.44497e-40
Il13ra1	0.18351	1.37771	1.1942	7.41615e-71	1.68792e-66
Rgs7	0.209655	1.40498	1.19533	8.35745e-37	1.90216e-32
Pde4b	1.14622	2.34236	1.19614	6.75283e-63	1.53695e-58
Ccnd3	0.82594	2.02322	1.19728	1.55755e-45	3.54498e-41
Rasa3	0.393208	1.59667	1.20347	1.13551e-51	2.58443e-47
Glul	0.706449	1.91914	1.21269	6.56775e-62	1.49482e-57
Anxa3	0.484136	1.70076	1.21663	2.88241e-45	6.56036e-41
9530026P05Rik	0.750414	1.96905	1.21863	1.8164e-40	4.13413e-36
Pim1	0.25079	1.4695	1.21871	3.90202e-61	8.881e-57
Cdh6	0.651715	1.87116	1.21944	1.44726e-29	3.29396e-25
Nfkb1	1.50635	2.74247	1.23612	5.75854e-57	1.31064e-52
Chrm3	0.188696	1.42564	1.23694	1.00076e-26	2.27774e-22
Mmp2	1.0707	2.30774	1.23704	1.60448e-74	3.6518e-70
Gbp5	0.0255015	1.26365	1.23815	7.12056e-54	1.62064e-49
Srgn	0.345355	1.5837	1.23834	2.91226e-62	6.6283e-58
Aff1	0.661061	1.90159	1.24053	4.31757e-56	9.82678e-52
Il6ra	0.0496951	1.29046	1.24076	1.49897e-82	3.41165e-78
Hif1a	1.03661	2.28077	1.24416	8.61431e-56	1.96062e-51
Ier3	0.473712	1.729	1.25529	3.67724e-72	8.36939e-68
Top1	1.80342	3.05989	1.25647	2.20878e-65	5.02718e-61
Smim3	0.200873	1.4602	1.25933	4.30142e-71	9.79004e-67
Arhgap24	1.1237	2.38397	1.26027	7.42523e-49	1.68998e-44
Tnip1	0.467677	1.73454	1.26687	6.40086e-59	1.45684e-54
Rnf150	0.405048	1.67747	1.27243	1.31671e-56	2.99683e-52
Sned1	1.2473	2.52402	1.27672	4.63014e-41	1.05382e-36
Tead1	2.67503	3.95422	1.27919	6.98735e-128	1.59032e-123
Ifitm3	0.649819	1.92928	1.27946	9.22276e-85	2.0991e-80
Bcl3	0.128051	1.4081	1.28005	8.53348e-94	1.94222e-89
Gm17268	0.0400347	1.331	1.29096	4.05432e-43	9.22763e-39
Klf9	1.43406	2.73235	1.29829	2.62538e-106	5.97536e-102
Ank3	0.343524	1.64496	1.30143	1.76608e-43	4.01961e-39
Dgkh	1.03636	2.34141	1.30504	7.93005e-58	1.80488e-53
Nupr1	0.526025	1.83955	1.31353	6.18355e-41	1.40738e-36
Sdc4	0.508576	1.82388	1.31531	5.5884e-72	1.27192e-67
Dnah7a	0.127576	1.44492	1.31734	2.48502e-94	5.6559e-90
Zfp36l1	1.05424	2.37315	1.31891	3.96939e-96	9.03434e-92
Ifitm1	0.139215	1.46658	1.32737	8.35748e-91	1.90216e-86
Osbpl3	0.272035	1.606	1.33396	4.53642e-67	1.03249e-62
Runx1	1.36899	2.70903	1.34003	1.43719e-95	3.27104e-91
Lpgat1	1.21929	2.56782	1.34853	1.9767e-70	4.49898e-66
Aspg	0.0665296	1.42025	1.35372	2.19366e-86	4.99276e-82
Eva1c	0.167239	1.52756	1.36032	1.55745e-83	3.54476e-79
Gclc	0.394699	1.75664	1.36194	3.73302e-60	8.49634e-56
Spon1	0.247093	1.62986	1.38277	9.00201e-37	2.04886e-32
Cacna1d	1.19526	2.57823	1.38297	1.49124e-68	3.39406e-64
Prok2	0.00383925	1.40046	1.39662	3.17206e-92	7.2196e-88
Tanc1	1.23833	2.63986	1.40154	5.75812e-64	1.31055e-59
Il6st	1.23126	2.6436	1.41233	4.79803e-95	1.09203e-90
Uty	0.0269465	1.44195	1.41501	9.48852e-94	2.15959e-89
Relb	0.441604	1.85917	1.41756	5.74419e-91	1.30738e-86
Il4ra	0.0855115	1.50698	1.42147	2.01472e-98	4.5855e-94
Atp10a	0.875465	2.30418	1.42872	5.16126e-44	1.1747e-39
Vipr2	0.245564	1.68426	1.43869	3.87565e-74	8.82099e-70
Deptor	0.395229	1.83849	1.44327	6.30221e-74	1.43438e-69
Ptx3	0.353654	1.79867	1.44502	1.23519e-58	2.8113e-54
Cblb	1.3352	2.78288	1.44768	4.31226e-99	9.81471e-95
Ptpn2	1.03116	2.48293	1.45177	1.52547e-73	3.47197e-69
Hk2	0.223719	1.67826	1.45454	8.79511e-79	2.00177e-74
Adam22	2.20706	3.66353	1.45647	7.85702e-79	1.78826e-74
Cyp1b1	0.142282	1.60907	1.46679	9.98216e-98	2.27194e-93
Rhbdd2	0.210227	1.68379	1.47356	3.68563e-63	8.3885e-59
Cebpd	0.554024	2.02848	1.47446	2.73242e-108	6.21899e-104
Sulf1	2.12213	3.6065	1.48437	5.14445e-116	1.17088e-111
Scara5	0.684973	2.17089	1.48591	1.05828e-69	2.40864e-65
Cxcl12	0.997866	2.48393	1.48606	1.20162e-89	2.73489e-85
Lama4	1.90578	3.39974	1.49397	2.05645e-138	4.68048e-134
Ptprg	2.31568	3.8167	1.50102	3.58867e-165	8.16782e-161
Porcn	0.291148	1.79765	1.5065	2.28721e-64	5.2057e-60
Arl15	2.62553	4.13562	1.51009	5.19875e-202	1.18323e-197
Esyt2	1.56284	3.0831	1.52025	8.95466e-113	2.03808e-108
Sdk1	1.66766	3.20268	1.53502	3.14207e-54	7.15134e-50
Ugdh	0.47715	2.01272	1.53557	2.13376e-49	4.85643e-45
Adarb1	1.15195	2.69597	1.54402	1.67753e-76	3.81805e-72
Grk5	0.868353	2.42973	1.56138	4.29253e-53	9.7698e-49
Csgalnact1	1.5779	3.14136	1.56345	1.41929e-71	3.2303e-67
Lrp1	2.32732	3.89512	1.5678	7.88235e-238	1.79402e-233
9530059O14Rik	0	1.57492	1.57492	1.10186e-54	2.50783e-50
Fmo1	1.428	3.00785	1.57985	5.67274e-38	1.29111e-33
Chst11	0.868851	2.46588	1.59703	1.2181e-76	2.7724e-72
Fgf7	0.683474	2.2837	1.60022	1.4068e-84	3.20188e-80
Sphk1	0.211987	1.82178	1.60979	1.28714e-99	2.92953e-95
Hacd2	0.618694	2.23983	1.62114	2.23665e-61	5.09061e-57
Steap4	0.120031	1.74353	1.62349	2.74441e-106	6.24628e-102
Smoc2	1.3248	2.96344	1.63864	3.05843e-129	6.96099e-125
Col4a2	1.13643	2.77822	1.6418	5.23202e-126	1.19081e-121
Gm29554	0.232954	1.88584	1.65289	3.13029e-108	7.12454e-104
Icam1	0.512868	2.19005	1.67718	7.27911e-94	1.65672e-89
Col4a1	1.30886	3.0106	1.70173	2.65744e-149	6.04834e-145
Sod2	0.151316	1.85718	1.70586	1.63748e-143	3.72691e-139
Acsl4	0.223894	1.93261	1.70871	7.95722e-113	1.81106e-108
Serpina3n	0	1.75808	1.75808	3.32071e-124	7.55793e-120
Rnd1	0.0433273	1.82315	1.77983	1.00808e-118	2.2944e-114
Pdgfra	1.0811	2.86572	1.78462	8.9111e-113	2.02817e-108
Nfkbia	0.185909	1.9778	1.79189	7.06622e-143	1.60827e-138
Birc3	0.410537	2.21211	1.80157	1.8143e-104	4.12934e-100
Il1r1	0.274183	2.08099	1.8068	8.54316e-95	1.94442e-90
Prmt8	1.20085	3.00804	1.80718	1.32113e-110	3.00689e-106
Birc2	0.752495	2.56556	1.81306	4.26723e-141	9.71221e-137
Abi1	1.3546	3.16929	1.81469	1.26789e-152	2.88573e-148
Lpcat2	0.506974	2.33016	1.82319	8.58685e-116	1.95437e-111
Xdh	0.0415977	1.8651	1.8235	1.07245e-132	2.4409e-128
Osmr	0.510249	2.34706	1.83681	4.50858e-159	1.02615e-154
Mmp13	0.237524	2.08967	1.85215	3.27139e-60	7.44569e-56
Lox	1.03641	2.89228	1.85587	7.09968e-141	1.61589e-136
Pmvk	0.120851	1.98213	1.86128	3.81029e-89	8.67221e-85
Pappa	1.57233	3.46608	1.89375	1.82038e-71	4.14319e-67
Kif21a	0.263805	2.23138	1.96757	2.72279e-146	6.19708e-142
Cxcl1	0.0109593	2.00101	1.99005	1.19709e-149	2.72457e-145
Cyyr1	0.187014	2.18896	2.00194	2.26613e-128	5.15771e-124
Susd6	1.49678	3.52173	2.02496	5.45417e-240	1.24137e-235
Errfi1	1.35652	3.38446	2.02794	1.11022e-162	2.52685e-158
Mbd1	0.75229	2.78541	2.03312	6.82085e-56	1.55243e-51
Rock2	2.43625	4.47269	2.03645	2.61895e-292	5.96074e-288
Dennd4a	2.02996	4.07482	2.04485	3.95123e-235	8.993e-231
Csf3	0	2.06147	2.06147	2.54396e-150	5.79006e-146
Nrg3	0.455825	2.52444	2.06862	6.90239e-56	1.57098e-51
Glis3	1.02516	3.15029	2.12513	3.06813e-128	6.98307e-124
4930578G10Rik	0.0198683	2.15578	2.13591	6.78823e-108	1.545e-103
Tgfbr3	2.2912	4.43411	2.14291	0	0
Timp1	0.268932	2.42471	2.15578	1.8157e-189	4.13254e-185
Ctps	0.507827	2.6752	2.16737	2.59782e-200	5.91264e-196
Sbno2	0.570572	2.76195	2.19138	9.03451e-224	2.05625e-219
Serpine2	0.868259	3.10659	2.23833	4.15878e-116	9.46537e-112
Pde4d	2.80698	5.05586	2.24888	4.24327e-202	9.65769e-198
Ism1	0.74877	3.04513	2.29636	2.64861e-172	6.02824e-168
Cxcl14	0.483979	2.78578	2.3018	1.91596e-159	4.36073e-155
Chil1	0.0149848	2.33856	2.32357	7.29742e-136	1.66089e-131
Gm20400	0.203485	2.53428	2.3308	2.68446e-175	6.10984e-171
Pdlim5	1.86421	4.23647	2.37226	3.24948e-262	7.39581e-258
Serping1	1.15242	3.5279	2.37547	2.55474e-287	5.81459e-283
Gpm6b	0.784202	3.19526	2.41106	1.27368e-201	2.89891e-197
Il6	0.0143925	2.49116	2.47677	3.38546e-141	7.70531e-137
Neat1	1.45012	3.93142	2.4813	2.29416e-261	5.22151e-257
Rad51b	0.634252	3.1311	2.49684	3.13503e-147	7.13533e-143
Lcn2	0.00874698	2.53094	2.5222	1.66377e-273	3.78674e-269
Camk4	1.29551	3.82895	2.53344	2.86956e-201	6.53111e-197
Fth1	1.45898	4.02077	2.56179	0	0
Slc39a14	1.78419	4.37427	2.59008	0	0
Cpne8	0.850862	3.47684	2.62598	1.4927e-304	3.39737e-300
Pld1	1.06182	3.69477	2.63295	1.41853e-131	3.22858e-127
Fkbp5	0.284257	2.973	2.68874	1.1721e-300	2.6677e-296
Spidr	1.12145	3.89709	2.77564	0	0
Ap4e1	0.671537	3.47853	2.80699	3.11765e-271	7.09577e-267
Hdac9	0.776978	3.60598	2.829	8.64422e-143	1.96743e-138
Olfr1033	0.695146	3.56159	2.86645	0	0
Zbtb16	0.095063	3.00378	2.90872	0	0
Pappa2	0.693513	3.64155	2.94804	1.09641e-207	2.49542e-203
Pde10a	1.20005	4.24366	3.04361	2.84966e-194	6.48583e-190
Saa3	0.00839484	3.05992	3.05152	0	0
Cp	0.514533	3.6863	3.17177	9.71191e-269	2.21043e-264
Apod	0.652764	3.94487	3.2921	0	0
Lbp	0.647212	3.96371	3.3165	0	0
Ttr	0.151609	3.49952	3.34791	0	0
Mt2	0.0764031	3.85111	3.77471	0	0
Prg4	0.00719751	3.78506	3.77787	7.5329e-181	1.71449e-176
Kiz	0.642378	4.53689	3.89451	0	0
Mt1	0.346515	4.88596	4.53945	0	0

## Sheet: Fibroblast dura 3
gene	log2(average expression control + 1)	log2(average expression infected + 1)	avg_log2FC	p_val	p_val_adj
Itgbl1	3.9098	1.21366	-2.69614	0	0
Slc16a1	3.63773	1.13977	-2.49796	0	0
Slc4a4	3.93351	1.56404	-2.36947	0	0
Galnt13	3.82863	1.50427	-2.32436	2.00921e-258	4.57296e-254
Slit2	4.39994	2.08372	-2.31622	0	0
Tsix	3.05187	0.831363	-2.2205	0	0
Cdh18	2.81357	0.704834	-2.10874	2.03526e-233	4.63226e-229
Unc5c	4.17204	2.07249	-2.09955	0	0
Slc47a1	3.47004	1.48459	-1.98545	3.36396e-297	7.65637e-293
Fam19a1	2.55598	0.605071	-1.95091	1.54586e-152	3.51838e-148
Slc4a10	5.05264	3.12621	-1.92643	0	0
Nr3c2	3.85781	1.95769	-1.90012	5.72213e-286	1.30236e-281
Col25a1	3.9805	2.08072	-1.89978	1.85915e-117	4.23142e-113
Plagl1	2.67782	0.819986	-1.85783	4.12146e-224	9.38043e-220
Xist	5.64115	3.78452	-1.85663	0	0
Gria4	2.67814	0.849773	-1.82837	1.23946e-192	2.82101e-188
Col23a1	2.94742	1.13283	-1.81458	2.12014e-167	4.82543e-163
Pid1	4.19177	2.37928	-1.81249	0	0
Adamts12	2.61409	0.804779	-1.80931	0	0
Slc26a7	2.31304	0.601417	-1.71163	0	0
Prkag2	3.30057	1.6414	-1.65917	2.81558e-211	6.40827e-207
Mmp16	4.64527	3.01699	-1.62827	3.54846e-212	8.07631e-208
A230057D06Rik	2.65197	1.03775	-1.61422	1.2471e-253	2.83839e-249
Lama2	2.43218	0.860837	-1.57134	1.45805e-247	3.31853e-243
Btg2	2.28497	0.725435	-1.55954	4.0434e-205	9.20277e-201
Plpp3	3.70329	2.16668	-1.53661	4.65666e-237	1.05986e-232
Gucy1a2	1.77191	0.248052	-1.52386	2.47341e-249	5.62948e-245
Wnk1	4.21223	2.69201	-1.52022	1.17356e-273	2.67103e-269
Zfp804b	2.59876	1.07936	-1.5194	8.04278e-156	1.83054e-151
Csrp2	2.72345	1.21764	-1.50581	1.48203e-213	3.37309e-209
Slc16a9	2.93283	1.43062	-1.50221	1.82204e-202	4.14697e-198
Grb10	4.17468	2.67311	-1.50157	1.47601e-268	3.3594e-264
Rab30	1.88366	0.395351	-1.48831	9.20581e-278	2.09524e-273
Rspo3	2.14175	0.657429	-1.48432	1.71623e-213	3.90614e-209
Kcnq5	3.51062	2.02644	-1.48418	7.85623e-105	1.78808e-100
Reps2	2.7112	1.2328	-1.4784	5.34228e-203	1.2159e-198
Adamtsl1	3.07962	1.64201	-1.43761	6.40193e-113	1.45708e-108
Slc24a3	4.90718	3.48197	-1.4252	2.01288e-279	4.58131e-275
Adamts17	1.59881	0.179728	-1.41908	2.09019e-197	4.75728e-193
Hes1	2.58828	1.19209	-1.39619	4.05917e-197	9.23867e-193
Dock4	3.10494	1.72043	-1.38451	4.52492e-197	1.02987e-192
Slc23a2	4.83001	3.49757	-1.33244	4.91492e-204	1.11864e-199
Nr4a2	2.22708	0.89548	-1.3316	2.35938e-144	5.36994e-140
Col14a1	2.06706	0.770893	-1.29617	7.74066e-130	1.76177e-125
Hs6st2	2.0368	0.74533	-1.29147	1.09659e-169	2.49583e-165
Hmcn1	3.95898	2.69157	-1.26742	2.75309e-212	6.26603e-208
Dlg2	3.95619	2.69888	-1.25731	8.70766e-219	1.98186e-214
Bzw1	3.35771	2.10907	-1.24864	1.67964e-173	3.82286e-169
Mpped2	2.96179	1.73757	-1.22422	1.10637e-185	2.51809e-181
Gnas	3.60421	2.39422	-1.20999	1.29193e-125	2.94043e-121
Ust	2.6836	1.47509	-1.20851	1.67424e-137	3.81057e-133
Bmp4	2.18666	0.996469	-1.19019	2.29913e-150	5.23282e-146
Gxylt2	1.89883	0.713833	-1.185	6.30739e-167	1.43556e-162
Dok6	1.67499	0.491536	-1.18345	5.53639e-83	1.26008e-78
Cdon	2.42585	1.25107	-1.17478	3.12613e-144	7.11508e-140
Pcdh7	4.22636	3.05223	-1.17413	6.48561e-190	1.47613e-185
Atp1b1	2.25853	1.09723	-1.1613	6.43069e-157	1.46363e-152
Gulp1	4.19739	3.04424	-1.15315	2.34823e-199	5.34457e-195
Col12a1	3.02168	1.86877	-1.15291	2.16125e-145	4.91901e-141
Spock3	1.28999	0.151468	-1.13852	2.08677e-106	4.74949e-102
Coq10b	1.95614	0.820216	-1.13593	2.31364e-175	5.26584e-171
Ptn	3.07591	1.95127	-1.12464	6.86394e-150	1.56223e-145
Foxd1	3.02529	1.90204	-1.12324	1.76543e-182	4.01811e-178
Smad6	1.88356	0.762395	-1.12117	4.29843e-150	9.78322e-146
Sesn3	1.65354	0.54098	-1.11256	7.96641e-155	1.81316e-150
Prdm6	3.30029	2.18784	-1.11244	2.45629e-164	5.59051e-160
Slit3	4.25574	3.14387	-1.11187	4.89457e-115	1.114e-110
Sik1	2.09412	0.986916	-1.1072	1.44523e-161	3.28934e-157
Phactr2	2.09127	0.994609	-1.09666	3.14799e-139	7.16484e-135
Gab1	2.23556	1.14322	-1.09234	5.43853e-129	1.23781e-124
Sncaip	1.40846	0.316794	-1.09166	3.04051e-165	6.9202e-161
Add3	3.50235	2.41461	-1.08774	1.35539e-147	3.08487e-143
Cdh1	1.82869	0.741281	-1.08741	1.27029e-85	2.89117e-81
Plxdc2	2.00436	0.930423	-1.07393	9.02355e-111	2.05376e-106
Zbtb7c	2.57443	1.50301	-1.07141	1.43556e-154	3.26733e-150
Id2	1.84526	0.774163	-1.0711	3.30455e-139	7.52117e-135
Rhobtb1	1.93582	0.869985	-1.06584	4.80794e-150	1.09429e-145
Opcml	2.32548	1.26351	-1.06197	1.13085e-23	2.57382e-19
Samd4	2.67244	1.61185	-1.06059	6.03826e-134	1.37431e-129
1500015O10Rik	2.57395	1.52097	-1.05299	2.63869e-109	6.00566e-105
Arf4	2.6893	1.63764	-1.05166	2.35466e-103	5.35921e-99
Spats2l	1.55395	0.502518	-1.05143	2.68993e-159	6.12229e-155
Mfap4	1.67497	0.627229	-1.04774	1.06116e-74	2.41521e-70
Nmnat2	1.63347	0.59701	-1.03646	3.75441e-147	8.54504e-143
Adamts6	1.43124	0.39573	-1.03551	3.21788e-153	7.32391e-149
Gm14061	2.49822	1.46462	-1.0336	4.04142e-112	9.19827e-108
Arhgap10	2.55668	1.52399	-1.03268	8.61729e-137	1.96129e-132
Bnc2	5.72227	4.69021	-1.03206	3.55902e-259	8.10033e-255
Thbd	1.54105	0.510501	-1.03055	7.16158e-162	1.62997e-157
H3f3b	4.10656	3.07634	-1.03021	3.63103e-157	8.26422e-153
C130073E24Rik	1.17765	0.150554	-1.0271	2.96183e-116	6.74112e-112
Exoc4	4.08746	3.06252	-1.02495	3.66691e-164	8.3459e-160
Ext1	3.20801	2.18691	-1.0211	2.29626e-110	5.2263e-106
Kcnq1	2.73156	1.7113	-1.02026	1.78868e-131	4.07103e-127
Tmeff2	3.87158	2.85554	-1.01604	1.08425e-90	2.46775e-86
Cdkn1c	1.85256	0.837581	-1.01498	5.86618e-108	1.33514e-103
Gm765	1.34926	0.336721	-1.01254	8.31761e-110	1.89309e-105
Nckap5	1.21187	0.199522	-1.01234	5.59359e-116	1.2731e-111
Alpl	1.87007	0.862543	-1.00752	1.0104e-125	2.29968e-121
Tgfb2	1.42333	0.415902	-1.00742	1.88915e-141	4.29971e-137
Gm26883	2.42763	1.42282	-1.00481	1.54576e-119	3.51814e-115
Fhit	2.71766	1.71603	-1.00163	2.15707e-118	4.90948e-114
Gm29478	1.64478	0.644455	-1.00032	7.04032e-81	1.60238e-76
Ddx3y	0.0405908	0.996782	0.956191	3.11668e-56	7.09355e-52
Diaph2	1.80169	2.80197	1.00028	3.8266e-43	8.70934e-39
Prkg1	2.22089	3.23405	1.01316	9.55038e-49	2.17367e-44
Ugdh	0.485209	1.49923	1.01402	1.27643e-25	2.90516e-21
Pde7b	2.94691	3.96862	1.02171	2.9079e-53	6.61839e-49
Col4a2	0.97049	1.99775	1.02726	1.45838e-42	3.31928e-38
Adamts3	0.525529	1.55366	1.02813	3.76907e-34	8.5784e-30
Igfbp4	0.782532	1.81075	1.02822	3.05906e-54	6.96243e-50
Plscr1	0.52276	1.55266	1.0299	1.01792e-41	2.31679e-37
Slc9b2	1.3766	2.41313	1.03653	1.69701e-33	3.8624e-29
Hivep2	1.34684	2.38856	1.04173	2.47219e-58	5.62671e-54
Myo1e	1.16118	2.21088	1.0497	6.77019e-31	1.5409e-26
Col4a1	1.07754	2.12888	1.05135	3.15263e-46	7.1754e-42
Mamdc2	0.556359	1.61206	1.0557	6.21468e-25	1.41446e-20
Il6ra	0.0844199	1.14819	1.06377	3.90766e-69	8.89383e-65
Sdk1	2.19593	3.26189	1.06596	1.74279e-52	3.96658e-48
Birc3	0.318934	1.38526	1.06633	6.0837e-44	1.38465e-39
Il1r1	0.196955	1.26769	1.07074	1.59274e-37	3.62507e-33
Camk2d	2.32769	3.40322	1.07553	7.24756e-77	1.64954e-72
Slc7a11	0.340391	1.41925	1.07886	6.94842e-30	1.58146e-25
Pabpc1	1.02819	2.10979	1.0816	1.00522e-45	2.28789e-41
Eif2s3y	0.00263933	1.09073	1.08809	1.49969e-69	3.41328e-65
Bst2	0.19344	1.28686	1.09342	6.61384e-62	1.50531e-57
Acat3	0.0433086	1.13699	1.09368	8.66545e-78	1.97226e-73
Flot2	0.6427	1.73739	1.09469	4.1176e-54	9.37165e-50
Ror1	2.21909	3.31498	1.09589	1.27308e-65	2.89752e-61
Gm34907	0.0234655	1.1201	1.09664	4.77663e-75	1.08716e-70
Pde3a	0.614251	1.7138	1.09955	1.72859e-43	3.93428e-39
Relb	0.332269	1.43217	1.0999	8.80254e-60	2.00346e-55
Arhgap24	0.853527	1.96767	1.11414	1.58814e-54	3.6146e-50
Fndc3b	2.34129	3.45736	1.11607	1.07108e-133	2.43777e-129
Tmem119	0.341073	1.46677	1.1257	1.57406e-57	3.58256e-53
Serpina3n	0.00118178	1.12931	1.12813	4.34527e-72	9.88982e-68
Bcl3	0.0493851	1.18991	1.14052	8.42513e-85	1.91756e-80
Xbp1	0.534897	1.67854	1.14364	4.82701e-61	1.09863e-56
Il6	0.0216962	1.16887	1.14718	1.11422e-61	2.53597e-57
Ier3	0.630323	1.77978	1.14946	1.65115e-62	3.75802e-58
Lox	0.680912	1.8345	1.15359	1.20602e-59	2.74491e-55
Stat3	1.61588	2.76986	1.15398	4.23712e-87	9.64369e-83
Eva1c	1.48698	2.64411	1.15713	4.1961e-78	9.55033e-74
Ctsl	1.47885	2.63659	1.15774	4.28949e-59	9.76289e-55
Tenm2	0.143241	1.30358	1.16034	5.51695e-41	1.25566e-36
Susd6	1.81784	2.97917	1.16134	1.46294e-81	3.32964e-77
Rnd1	0.00809785	1.17384	1.16574	4.06363e-68	9.24883e-64
Socs3	0.167353	1.33597	1.16862	1.07157e-76	2.43888e-72
Gm20186	0.612776	1.78221	1.16943	1.06736e-54	2.42931e-50
Il6st	1.3164	2.51957	1.20317	5.86367e-80	1.33457e-75
Jmjd1c	2.31386	3.52074	1.20688	1.52479e-141	3.47042e-137
Uap1	0.353404	1.56514	1.21174	1.1194e-43	2.54776e-39
Tead1	2.59323	3.81938	1.22615	9.19183e-141	2.09206e-136
Sulf1	1.53421	2.76953	1.23532	3.59763e-74	8.18821e-70
Rasal2	1.34684	2.59066	1.24382	2.18533e-84	4.9738e-80
Srgn	0.124098	1.36992	1.24582	8.03713e-76	1.82925e-71
Ptpn2	1.01464	2.27168	1.25703	3.13429e-63	7.13364e-59
Rnf150	0.175713	1.43773	1.26202	2.82518e-68	6.4301e-64
Fry	0.737383	2.00085	1.26346	3.80528e-32	8.66082e-28
Lrp1	1.87148	3.17037	1.29889	1.81209e-138	4.12433e-134
Fmnl2	2.90127	4.20698	1.30571	1.85811e-147	4.22905e-143
Tbc1d8	0.212961	1.51886	1.3059	1.77721e-74	4.04493e-70
Rad51b	0.900312	2.20668	1.30636	4.01183e-61	9.13092e-57
Hs3st4	0.167603	1.47868	1.31108	1.94845e-59	4.43468e-55
Ppm1h	2.22045	3.53527	1.31482	1.46754e-108	3.34013e-104
Rnf125	0.0461682	1.36224	1.31608	7.52366e-88	1.71238e-83
Pdgfra	0.614127	1.94148	1.32735	3.27249e-61	7.44819e-57
Cebpd	0.87246	2.20634	1.33388	1.43098e-104	3.25692e-100
Sntg1	0.499184	1.83509	1.33591	4.47009e-62	1.01739e-57
Lama4	1.42652	2.76615	1.33963	1.24173e-101	2.82618e-97
Camk1d	1.01567	2.35903	1.34336	1.80765e-72	4.11421e-68
Gm29554	0.908861	2.27197	1.36311	6.5507e-91	1.49094e-86
Ampd3	0.529056	1.89256	1.3635	2.03087e-91	4.62225e-87
Pde4d	2.43403	3.80234	1.3683	5.1394e-101	1.16973e-96
Chst11	0.875996	2.24735	1.37135	5.29322e-57	1.20474e-52
Errfi1	0.8049	2.1879	1.383	9.19428e-72	2.09262e-67
Synpo	0.276346	1.6731	1.39675	9.96516e-100	2.26807e-95
Akr1b3	1.18274	2.57965	1.39691	6.62283e-83	1.50736e-78
Hdac4	1.09432	2.4972	1.40288	6.14953e-98	1.39963e-93
Pdzrn3	1.28245	2.68646	1.40401	2.77818e-65	6.32315e-61
St6gal1	0.967343	2.37289	1.40554	2.74958e-89	6.25805e-85
Cyp1b1	0.22488	1.64685	1.42198	1.21832e-92	2.7729e-88
Gm17268	0.0339038	1.47849	1.44459	1.12517e-42	2.5609e-38
Prok2	0.00334063	1.44911	1.44577	7.72421e-87	1.75803e-82
Icam1	0.388632	1.85201	1.46338	7.45416e-71	1.69657e-66
Ifitm1	0.193005	1.66767	1.47467	2.61959e-110	5.96218e-106
Tmem100	0.695354	2.17682	1.48146	1.04191e-72	2.3714e-68
Ctps	0.439718	1.92739	1.48767	2.24851e-99	5.1176e-95
Sugct	0.894786	2.39782	1.50304	1.15634e-69	2.63183e-65
Neat1	2.85286	4.36435	1.51149	4.07691e-215	9.27905e-211
Clec2d	0.629509	2.15531	1.5258	4.42431e-112	1.00697e-107
Dnah7a	0.233321	1.78467	1.55135	3.1968e-123	7.27591e-119
Xdh	0.0614756	1.61551	1.55404	5.49207e-106	1.25e-101
Trpm3	3.92231	5.47823	1.55592	1.14796e-79	2.61275e-75
Mirg	0.603997	2.1602	1.55621	1.56739e-80	3.56737e-76
Smoc2	1.29764	2.85439	1.55675	1.17157e-138	2.6665e-134
Gm26917	1.61165	3.18448	1.57282	4.56017e-98	1.0379e-93
Rbbp8	1.08818	2.67097	1.5828	5.74576e-118	1.30773e-113
Abcc4	0.665274	2.24916	1.58389	1.58355e-91	3.60416e-87
Bicd1	0.803668	2.39644	1.59278	1.04257e-56	2.37289e-52
Gm48228	1.40434	3.00709	1.60275	4.37368e-170	9.9545e-166
Vipr2	0.0273348	1.65718	1.62984	3.55817e-112	8.09839e-108
Nfasc	0.0680806	1.70147	1.63339	4.04511e-108	9.20668e-104
Sod2	0.168251	1.80469	1.63644	5.61243e-121	1.27739e-116
Fbln1	1.62859	3.26525	1.63667	2.88073e-169	6.55654e-165
Slco3a1	0.86613	2.50294	1.63681	3.30145e-131	7.51411e-127
Uty	0.0123388	1.65571	1.64337	1.36506e-122	3.10688e-118
Pdcd4	1.47345	3.14152	1.66807	1.01449e-126	2.30897e-122
Cxcl1	0	1.66872	1.66872	6.3928e-112	1.455e-107
Cpne8	0.459941	2.13202	1.67208	2.78665e-127	6.34241e-123
Ifitm3	0.60554	2.29437	1.68883	6.86628e-144	1.56277e-139
Nfkbia	0.273527	1.98802	1.7145	8.11477e-140	1.84692e-135
Fkbp5	1.44168	3.16339	1.72171	8.88864e-180	2.02306e-175
Osbpl3	0.200897	1.93294	1.73204	8.63902e-130	1.96624e-125
Kif21a	0.864978	2.60328	1.73831	5.7459e-135	1.30777e-130
Prmt8	1.50604	3.25555	1.74951	6.04592e-162	1.37605e-157
Abcb1b	0.175135	1.92766	1.75253	4.96363e-51	1.12972e-46
Meg3	4.88836	6.65656	1.7682	6.90353e-256	1.57124e-251
Ngf	1.01204	2.78123	1.76919	5.6994e-106	1.29718e-101
Osmr	0.0650261	1.83556	1.77054	2.28367e-152	5.19764e-148
Gpm6b	0.712001	2.52562	1.81361	3.55535e-112	8.09198e-108
Aspg	0.0367047	1.85433	1.81762	4.54021e-152	1.03335e-147
Fstl1	2.86813	4.69594	1.8278	1.27963e-294	2.91243e-290
Pde4b	0.417591	2.33942	1.92183	2.17125e-115	4.94178e-111
Reg3g	0.00408274	1.93327	1.92919	5.65977e-85	1.28816e-80
Steap4	0.0551879	2.01746	1.96227	9.69665e-165	2.20696e-160
Ism1	0.232093	2.21205	1.97995	1.33744e-152	3.044e-148
Zbtb16	0.664164	2.66304	1.99888	2.77835e-184	6.32352e-180
Cdk14	1.63849	3.68789	2.0494	1.76829e-226	4.02464e-222
Timp1	0.25855	2.31166	2.05311	4.63729e-177	1.05545e-172
Syne1	0.754912	2.85487	2.09996	1.64603e-183	3.74635e-179
Grk5	1.59669	3.71425	2.11756	8.79259e-237	2.00119e-232
Entpd3	0.161878	2.33894	2.17706	4.03859e-173	9.19184e-169
Sbno2	0.568338	2.77669	2.20835	5.29076e-222	1.20418e-217
Csf3	0.00198172	2.21792	2.21594	2.42066e-151	5.50943e-147
Nrg3	0.287166	2.52498	2.23782	2.73217e-81	6.21842e-77
Cyyr1	0.16549	2.41567	2.25018	3.22963e-173	7.35065e-169
Gpcpd1	1.49117	3.75942	2.26825	1.9202e-265	4.37037e-261
Hdac9	1.3225	3.60905	2.28655	3.88972e-166	8.85299e-162
Adcy2	0.389712	2.7418	2.35209	2.20576e-198	5.02032e-194
Cacna1d	0.621799	2.9861	2.3643	9.80179e-216	2.23089e-211
Abi1	1.61986	4.04148	2.42162	0	0
Serping1	1.3519	3.79641	2.44451	0	0
Olfr1033	1.58363	4.10437	2.52074	0	0
Spidr	0.823636	3.37742	2.55379	1.28967e-297	2.93528e-293
Fth1	1.46038	4.02403	2.56365	0	0
Slc39a14	0.875613	3.45575	2.58013	1.26667e-295	2.88293e-291
Gm20400	1.03344	3.78296	2.74951	0	0
Esyt2	1.74321	4.5124	2.76918	0	0
Pde10a	0.571626	3.37324	2.80161	4.16744e-166	9.48508e-162
Ttr	0.119384	3.13377	3.01439	1.93635e-280	4.40713e-276
Ap4e1	0.959172	4.15591	3.19674	0	0
Saa3	0.0183612	3.29411	3.27575	2.14514e-294	4.88233e-290
Lcn2	0.00214376	3.41115	3.40901	0	0
Cp	0.322282	3.81617	3.49388	9.69971e-290	2.20765e-285
Lbp	0.752121	4.28702	3.5349	0	0
Mt2	0.138893	3.75157	3.61268	0	0
Prg4	0.255653	4.02149	3.76584	2.81433e-284	6.40542e-280
Kiz	1.24833	5.45069	4.20236	0	0
Apod	0.642228	4.96027	4.31804	0	0
Mt1	0.804957	5.20463	4.39967	0	0

## Sheet: Fibroblast pia
gene	log2(average expression control + 1)	log2(average expression infected + 1)	avg_log2FC	p_val	p_val_adj
Tsix	3.39828	1.01093	-2.38735	0	0
Frmpd4	4.02247	1.65966	-2.36281	0	0
Dock6	3.1588	1.05661	-2.10219	0	0
Zeb1	4.96424	3.03315	-1.93109	0	0
Rab30	2.31674	0.447743	-1.86899	0	0
Xist	6.0636	4.21895	-1.84465	0	0
Lamc3	3.02504	1.21253	-1.81251	0	0
Unc13c	2.33286	0.524711	-1.80815	5.25549e-259	1.19615e-254
Gm48742	2.89652	1.12438	-1.77214	0	0
Wnt4	2.57011	0.800435	-1.76968	0	0
Ptn	6.0251	4.258	-1.76711	0	0
Vamp5	2.87548	1.15475	-1.72073	0	0
Adra1a	2.30388	0.592034	-1.71185	0	0
Col26a1	3.2591	1.57399	-1.68511	0	0
Arhgap20	2.63711	0.95375	-1.68336	0	0
Mob3b	2.22079	0.544787	-1.67601	0	0
Fut8	2.80594	1.13358	-1.67235	0	0
Mpped2	3.0898	1.4209	-1.66889	0	0
Zfp536	3.52671	1.86794	-1.65877	0	0
Tmem132c	3.451	1.79479	-1.65621	0	0
Myl9	1.79582	0.154643	-1.64118	0	0
Plekhg1	3.11316	1.48333	-1.62983	0	0
Col4a6	3.3692	1.75649	-1.61271	0	0
March6	3.47043	1.8725	-1.59793	0	0
Tmem132cos	2.50511	0.914665	-1.59045	8.06184e-304	1.83487e-299
Csrp1	2.27476	0.691413	-1.58334	4.59957e-238	1.04686e-233
Col4a5	3.13271	1.57306	-1.55965	0	0
Gpc3	2.9181	1.37273	-1.54537	7.46631e-299	1.69933e-294
Adcy5	1.79246	0.281159	-1.5113	0	0
Kcnip4	3.18804	1.69113	-1.49691	6.16324e-210	1.40275e-205
Cnn2	2.09696	0.600643	-1.49631	0	0
Xkr4	2.07865	0.58829	-1.49036	7.89995e-242	1.79803e-237
Igsf8	2.80247	1.34012	-1.46235	0	0
Galnt17	2.02615	0.570495	-1.45565	1.1573e-276	2.63402e-272
Eda	2.165	0.712557	-1.45244	4.59348e-249	1.04548e-244
Slc6a1	1.59444	0.146697	-1.44774	0	0
Adamts12	3.82329	2.37901	-1.44428	0	0
Cthrc1	2.10242	0.659212	-1.44321	0	0
Adam12	4.14611	2.71084	-1.43527	3.89142e-255	8.85688e-251
Arhgap28	2.38773	0.957981	-1.42975	0	0
Gm11418	1.8338	0.412007	-1.42179	2.42676e-170	5.5233e-166
Igfbp2	3.28722	1.89199	-1.39523	1.74166e-304	3.96402e-300
Rell1	2.21669	0.843381	-1.37331	1.18497e-266	2.69699e-262
Slc22a8	1.6569	0.301785	-1.35512	0	0
Macf1	3.5806	2.22779	-1.3528	0	0
Epha7	3.2	1.84998	-1.35002	1.41385e-283	3.21792e-279
Arhgap29	3.1163	1.76754	-1.34876	0	0
Slc22a6	1.94093	0.59585	-1.34508	0	0
Fosb	1.3773	0.0397622	-1.33753	9.87644e-113	2.24788e-108
Bmp6	5.32872	4.00035	-1.32837	0	0
Wls	3.13538	1.8088	-1.32657	0	0
Kank2	2.07687	0.76281	-1.31406	6.0056e-299	1.36687e-294
Nid2	1.881	0.583204	-1.2978	6.69205e-294	1.52311e-289
Adamts6	1.7253	0.444017	-1.28129	4.39732e-246	1.00083e-241
Ppm1e	2.47666	1.20506	-1.27159	6.64217e-257	1.51176e-252
Mgat4c	2.05461	0.787049	-1.26756	7.87714e-121	1.79284e-116
Creb5	1.49351	0.231883	-1.26163	3.13473e-186	7.13466e-182
Slc13a4	2.38122	1.12777	-1.25345	4.98814e-194	1.1353e-189
Hlf	2.50396	1.2511	-1.25286	7.11089e-250	1.61844e-245
Rbfox1	4.38865	3.14246	-1.24619	5.37877e-84	1.22421e-79
Rassf8	2.45251	1.23594	-1.21657	6.72868e-264	1.53145e-259
Vtn	2.64964	1.43576	-1.21387	1.55718e-207	3.54415e-203
Sh3rf1	2.60857	1.3986	-1.20997	6.81442e-228	1.55096e-223
A630012P03Rik	1.5955	0.388828	-1.20667	5.82845e-225	1.32655e-220
Atp1a2	4.89213	3.6889	-1.20323	0	0
Reep1	1.55172	0.357282	-1.19443	1.21402e-184	2.76312e-180
Col23a1	2.50759	1.31468	-1.19291	6.49696e-193	1.47871e-188
Vcl	2.09583	0.91275	-1.18308	9.81753e-209	2.23447e-204
5530401A14Rik	1.36188	0.179178	-1.1827	3.67867e-179	8.37266e-175
Prkag2	2.39974	1.22386	-1.17588	1.61913e-155	3.68514e-151
Sncaip	2.32455	1.15725	-1.1673	2.0037e-226	4.56042e-222
Fam118a	1.50702	0.345	-1.16202	1.62438e-207	3.69708e-203
Gulp1	2.48736	1.3273	-1.16005	1.37185e-225	3.12233e-221
Afdn	2.5706	1.4143	-1.1563	1.35088e-236	3.07461e-232
Nrep	1.52912	0.3741	-1.15502	1.31417e-264	2.99105e-260
Tmtc4	3.1809	2.0289	-1.152	9.74509e-214	2.21798e-209
Eml1	1.72711	0.576515	-1.15059	8.7037e-252	1.98096e-247
Stard9	2.12165	0.971203	-1.15045	3.05823e-247	6.96053e-243
Ldb2	2.03963	0.889878	-1.14975	1.25392e-175	2.85393e-171
Trim62	1.50311	0.362613	-1.14049	1.72059e-229	3.91606e-225
Slc1a5	2.01985	0.88132	-1.13853	6.49404e-170	1.47804e-165
Gm16599	2.11376	0.977861	-1.1359	1.02458e-215	2.33194e-211
Slc24a3	3.30814	2.175	-1.13314	7.94457e-253	1.80818e-248
Slc41a1	1.69537	0.566886	-1.12848	8.31039e-242	1.89144e-237
Gm49267	1.86837	0.747964	-1.12041	1.01399e-201	2.30784e-197
Necab1	1.44573	0.344154	-1.10157	2.8057e-177	6.38577e-173
Tln2	2.1707	1.07574	-1.09496	2.1781e-225	4.95735e-221
Fhl2	1.52465	0.43509	-1.08956	6.54579e-205	1.48982e-200
Auts2	5.33705	4.24818	-1.08886	0	0
Abca9	1.73403	0.645506	-1.08852	1.59531e-228	3.63092e-224
Runx1t1	1.83394	0.759703	-1.07424	5.95119e-211	1.35449e-206
Fbxl7	4.44672	3.37547	-1.07125	1.20251e-259	2.73691e-255
Gatm	1.80449	0.733816	-1.07067	1.17241e-148	2.6684e-144
Colec12	3.93929	2.87529	-1.064	2.25424e-232	5.13065e-228
Cryl1	1.49466	0.434775	-1.05988	5.41656e-196	1.23281e-191
Tpcn1	1.43254	0.37545	-1.05709	9.0952e-220	2.07007e-215
Gxylt2	2.26693	1.2153	-1.05163	1.32303e-183	3.01122e-179
Hs6st2	1.73503	0.684534	-1.0505	3.5761e-160	8.13921e-156
Zic4	3.00543	1.95793	-1.0475	1.29092e-209	2.93813e-205
Samd4	2.13211	1.08525	-1.04685	1.32815e-175	3.02288e-171
Pdk1	1.54731	0.500736	-1.04658	2.37587e-208	5.40748e-204
Tnfrsf19	2.19699	1.15275	-1.04424	1.18211e-210	2.69049e-206
Maml2	3.14874	2.11211	-1.03663	3.35473e-188	7.63537e-184
Laptm4a	2.60971	1.57436	-1.03535	3.31064e-207	7.53502e-203
Utrn	3.09295	2.05794	-1.03501	8.53378e-209	1.94229e-204
Itgbl1	1.92361	0.889269	-1.03435	5.16791e-133	1.17622e-128
Plxnc1	1.3697	0.341446	-1.02826	3.09573e-219	7.04588e-215
Greb1l	1.69938	0.671644	-1.02773	2.27841e-188	5.18567e-184
Sphkap	1.17733	0.152405	-1.02493	7.32294e-161	1.6667e-156
Cmbl	1.22703	0.202203	-1.02483	7.67071e-241	1.74585e-236
Sidt1	3.96137	2.93744	-1.02393	1.44936e-242	3.29874e-238
Dock11	1.56388	0.540278	-1.0236	1.00665e-186	2.29113e-182
Aldh1a1	1.38069	0.357817	-1.02287	1.27835e-170	2.90953e-166
Tbc1d4	1.58087	0.559447	-1.02142	4.64783e-203	1.05785e-198
Map2k6	1.20681	0.186307	-1.0205	5.99915e-203	1.36541e-198
Tpst1	1.82946	0.809282	-1.02017	1.35745e-200	3.08955e-196
Wwox	3.14927	2.14091	-1.00836	7.85932e-157	1.78878e-152
Ddx3y	0.0131026	0.985151	0.972049	5.35379e-67	1.21852e-62
Dchs2	0.231883	1.23501	1.00312	2.63149e-54	5.98927e-50
Pim1	0.241661	1.24661	1.00495	6.244e-57	1.42113e-52
Lox	0.407932	1.41713	1.00919	1.9357e-61	4.40566e-57
Fmnl2	3.26826	4.28283	1.01457	3.65591e-123	8.32085e-119
Vmp1	1.66001	2.6793	1.01929	2.89629e-92	6.59196e-88
Rnf149	0.500441	1.52409	1.02365	1.62374e-47	3.69564e-43
Btg1	0.643091	1.66916	1.02607	5.94597e-47	1.3533e-42
Aff1	1.18181	2.21835	1.03653	7.86411e-63	1.78987e-58
Mast4	3.04055	4.0782	1.03765	1.02761e-142	2.33885e-138
2810474O19Rik	0.635595	1.6788	1.04321	1.56783e-44	3.56838e-40
Fosl2	0.35025	1.3942	1.04395	1.96876e-69	4.4809e-65
Cblb	1.70796	2.75199	1.04403	1.99781e-78	4.54702e-74
Gm26545	0.194318	1.24001	1.04569	1.36372e-58	3.10384e-54
Cyyr1	0.0591493	1.11497	1.05582	1.80324e-68	4.10418e-64
Aldh1a2	2.01707	3.07419	1.05712	1.03104e-72	2.34665e-68
Gpcpd1	1.40036	2.46825	1.06789	6.7669e-37	1.54015e-32
Rasa3	0.47891	1.54742	1.06851	2.12799e-57	4.84331e-53
Sdc4	0.194951	1.27142	1.07647	1.446e-66	3.2911e-62
Kif21a	0.114194	1.19734	1.08315	5.75685e-62	1.31026e-57
Ptpn1	0.72941	1.81554	1.08613	1.00984e-57	2.29841e-53
Nfkbiz	0.2545	1.34331	1.08881	4.00987e-73	9.12646e-69
Matn2	0.414782	1.5046	1.08982	3.2325e-55	7.35717e-51
Rnd1	0.0126879	1.1075	1.09481	6.65905e-65	1.5156e-60
Litaf	0.701226	1.79824	1.09701	9.87054e-71	2.24653e-66
Ptpn2	0.630939	1.72812	1.09719	2.84566e-58	6.47671e-54
Por	0.964004	2.07001	1.106	5.79172e-58	1.3182e-53
Ptprt	0.407102	1.5142	1.1071	5.21876e-43	1.18779e-38
D10Wsu102e	0.321602	1.42912	1.10752	2.25783e-57	5.13881e-53
Wnt5b	0.402716	1.51195	1.10924	1.66796e-49	3.79628e-45
Pear1	0.846461	1.96437	1.11791	4.56356e-75	1.03867e-70
Med13l	1.0316	2.15	1.1184	2.54936e-80	5.80234e-76
Rhoj	1.41531	2.54093	1.12562	4.0925e-57	9.31454e-53
Tnip1	0.223576	1.35174	1.12817	1.95324e-73	4.44558e-69
Cxcl2	0.00628879	1.14654	1.14025	2.60505e-74	5.9291e-70
Lacc1	0.522341	1.67114	1.1488	2.60327e-71	5.92505e-67
Itga1	1.19648	2.35927	1.16279	6.1386e-71	1.39714e-66
Smim3	0.137548	1.30675	1.1692	2.25752e-86	5.13812e-82
Klf9	1.63852	2.80858	1.17006	1.18475e-103	2.6965e-99
Ints6l	0.615912	1.78622	1.17031	8.32048e-76	1.89374e-71
Itgb8	0.106442	1.2794	1.17296	1.70312e-75	3.87629e-71
Cmip	1.18636	2.36287	1.1765	1.40959e-96	3.20822e-92
Cebpb	0.248106	1.42794	1.17984	2.37154e-85	5.39763e-81
Eif2s3y	0	1.18069	1.18069	3.6897e-91	8.39776e-87
Meg3	4.53809	5.72613	1.18804	7.56327e-113	1.7214e-108
Pdgfd	0.95624	2.14639	1.19016	1.19679e-57	2.72389e-53
Pde3a	0.794093	1.98484	1.19075	1.19319e-52	2.71571e-48
St6gal1	1.74193	2.93337	1.19145	6.99721e-121	1.59256e-116
Gm11417	0.472646	1.66766	1.19501	1.71252e-58	3.8977e-54
Gm16685	0.0237534	1.22198	1.19823	4.78648e-59	1.0894e-54
Bmpr2	1.70985	2.91658	1.20674	2.47869e-113	5.64149e-109
Hivep2	1.8445	3.06019	1.21569	6.17372e-135	1.40514e-130
Serpine2	1.8082	3.03073	1.22253	1.78772e-49	4.06886e-45
Serpina3n	0	1.2267	1.2267	2.42138e-95	5.51107e-91
Pros1	0.73988	1.97522	1.23534	3.73091e-91	8.49155e-87
Hk2	0.58994	1.82945	1.23951	2.86081e-65	6.5112e-61
Mirg	0.517962	1.78232	1.26436	2.22007e-58	5.05289e-54
Sox5os4	0.11765	1.38206	1.26441	2.43657e-82	5.54564e-78
Arl15	2.78473	4.04985	1.26512	6.45276e-108	1.46865e-103
Timp1	0.180396	1.45011	1.26971	2.52378e-101	5.74412e-97
Pde7b	2.55943	3.82918	1.26975	9.6317e-89	2.19218e-84
Ifnar2	1.12971	2.40326	1.27355	5.58591e-96	1.27135e-91
Neat1	0.913506	2.19689	1.28339	7.23782e-92	1.64733e-87
Ctps	0.462924	1.75898	1.29606	7.79646e-91	1.77447e-86
Alk	0.135683	1.44109	1.30541	4.25023e-75	9.67352e-71
Rad51b	0.516604	1.83173	1.31513	3.22629e-67	7.34302e-63
Il6st	1.63481	2.95707	1.32225	3.48594e-140	7.93399e-136
Nrp1	1.39743	2.72609	1.32866	3.75735e-93	8.55174e-89
Gcnt2	0.763493	2.09736	1.33386	2.5399e-111	5.7808e-107
Slc41a2	0.137476	1.4726	1.33513	5.10459e-95	1.16181e-90
Gng12	1.42172	2.76568	1.34396	1.26498e-134	2.8791e-130
Cers6	0.887659	2.24207	1.35441	8.8672e-84	2.01817e-79
Nrxn1	1.01915	2.38626	1.36711	1.85631e-73	4.22496e-69
Ptchd4	0.286769	1.65572	1.36896	1.8637e-58	4.24178e-54
Rnf125	0.02694	1.39625	1.36931	9.29614e-106	2.1158e-101
Fas	0.0400614	1.41482	1.37476	8.27394e-120	1.88315e-115
Galnt18	0.360443	1.73555	1.37511	9.21599e-69	2.09756e-64
Npas2	0.502956	1.88112	1.37817	1.46322e-84	3.3303e-80
Slc2a13	2.24078	3.63245	1.39167	5.02447e-95	1.14357e-90
Igfbp3	0.158497	1.55514	1.39664	4.52953e-89	1.03092e-84
Bmp5	1.70745	3.13586	1.42841	1.17427e-138	2.67263e-134
Ntrk2	0.716376	2.14976	1.43339	1.73192e-90	3.94185e-86
Abcc4	0.187763	1.62423	1.43647	7.61441e-113	1.73304e-108
Irak3	0.0867107	1.52696	1.44025	7.21352e-127	1.6418e-122
Gm26917	1.99677	3.44154	1.44478	8.32273e-105	1.89425e-100
Fstl1	2.80226	4.25478	1.45252	5.56093e-208	1.26567e-203
Ifitm3	0.837466	2.2911	1.45363	6.15393e-137	1.40063e-132
Carmil1	1.05446	2.51244	1.45798	2.1417e-135	4.8745e-131
Alas1	0.694614	2.15591	1.4613	8.41359e-74	1.91493e-69
Lama4	2.11196	3.5751	1.46314	4.85975e-221	1.10608e-216
Ap4e1	0.653195	2.13972	1.48652	9.38254e-99	2.13547e-94
Sntb2	1.63161	3.12639	1.49478	1.41832e-90	3.2281e-86
Ampd3	0.464418	1.95984	1.49542	2.36439e-117	5.38136e-113
Cpne8	0.32855	1.82923	1.50068	4.46775e-122	1.01686e-117
1200007C13Rik	0.0172458	1.53049	1.51324	3.14387e-109	7.15546e-105
Mbd1	0.631715	2.14602	1.5143	6.39218e-61	1.45486e-56
Ccl2	0.104647	1.62398	1.51933	4.28224e-93	9.74638e-89
Tns3	0.811192	2.34379	1.53259	2.5568e-155	5.81928e-151
Cxadr	0.610913	2.16598	1.55507	2.03134e-121	4.62334e-117
Fbln1	0.666386	2.22336	1.55697	4.81579e-121	1.09607e-116
Dcdc2a	1.76563	3.32516	1.55953	1.43025e-188	3.25525e-184
Pde4b	1.56096	3.13803	1.57707	3.57568e-164	8.13825e-160
Acat3	0.0231754	1.61355	1.59037	1.45458e-147	3.31063e-143
Parp8	1.13279	2.72455	1.59176	8.32884e-142	1.89564e-137
Zbtb16	0.0140976	1.61625	1.60215	1.7705e-140	4.02966e-136
Cyp7b1	1.59241	3.20599	1.61358	1.27923e-121	2.91153e-117
Relb	0.244154	1.86102	1.61686	2.27268e-146	5.17263e-142
Etv6	1.66337	3.29052	1.62715	7.27752e-205	1.65636e-200
Runx1	0.151624	1.78016	1.62854	4.28864e-143	9.76094e-139
Uty	0.0230899	1.65583	1.63274	2.48848e-139	5.66378e-135
Nfkb1	1.22103	2.8554	1.63437	2.1541e-150	4.90274e-146
Cacna1d	1.22133	2.88262	1.66129	2.73873e-119	6.23334e-115
Isyna1	1.86813	3.5312	1.66307	1.64103e-131	3.73499e-127
Pla1a	0.00711641	1.69762	1.69051	1.81838e-152	4.13863e-148
Atxn1	2.56733	4.266	1.69867	0	0
Cfh	2.99955	4.71805	1.71851	0	0
Bcl3	0.0897159	1.81108	1.72137	5.19783e-176	1.18303e-171
Adamts4	0.139613	1.86784	1.72822	4.96575e-135	1.13021e-130
Ifitm1	0.328098	2.0656	1.7375	1.37951e-181	3.13976e-177
Trpm3	2.87212	4.62178	1.74966	1.12346e-88	2.557e-84
Xbp1	0.614501	2.38116	1.76666	1.53423e-196	3.4919e-192
Casp4	0.0385888	1.84536	1.80677	8.68157e-177	1.97593e-172
Pdgfra	2.60474	4.44292	1.83818	0	0
Csf3	0	1.84753	1.84753	3.96741e-151	9.02983e-147
Rgs16	0.106277	1.98334	1.87706	8.91874e-183	2.0299e-178
Olfr1033	0.249701	2.1312	1.8815	9.39161e-185	2.13753e-180
Fkbp5	0.28035	2.17175	1.8914	2.67658e-193	6.09189e-189
Tmem100	0.744937	2.6428	1.89786	3.21106e-159	7.30836e-155
Pappa	0.0793769	1.97918	1.8998	3.84089e-96	8.74187e-92
Icam1	0.157874	2.08484	1.92696	3.26962e-171	7.44166e-167
Susd6	2.26809	4.21746	1.94936	0	0
Rnf144a	0.224928	2.18777	1.96284	5.27346e-192	1.20024e-187
Stat3	0.783358	2.765	1.98164	4.74028e-274	1.07889e-269
Birc3	0.487326	2.47838	1.99105	5.51476e-204	1.25516e-199
Mid1	1.31403	3.31626	2.00223	3.88776e-300	8.84853e-296
Nfkbia	0.214253	2.23157	2.01732	9.25209e-229	2.10578e-224
Ier3	1.44202	3.47364	2.03162	0	0
Osmr	0.293618	2.35085	2.05723	4.99535e-238	1.13694e-233
Lncpint	0.696046	2.76451	2.06847	8.50858e-222	1.93655e-217
Spidr	0.56648	2.65239	2.08591	1.08272e-218	2.46427e-214
Cebpd	0.321683	2.41612	2.09444	6.53683e-255	1.48778e-250
Lbp	0.095867	2.21131	2.11544	2.52896e-195	5.75591e-191
Man1a	0.487725	2.62345	2.13573	8.03448e-267	1.82865e-262
Sox5	0.76732	2.90513	2.13781	7.10789e-178	1.61776e-173
Serping1	0.779508	2.94269	2.16318	0	0
Kiz	0.511678	2.68129	2.16961	1.29499e-234	2.9474e-230
Cyp1b1	1.83221	4.01779	2.18558	0	0
Sod2	0.251382	2.51807	2.26669	1.77917e-272	4.04939e-268
Steap4	0.0225307	2.40936	2.38683	9.32715e-271	2.12286e-266
Lrmda	1.31485	3.75735	2.4425	0	0
Slc39a14	0.38295	2.84061	2.45766	0	0
Aspg	0.144193	2.62764	2.48345	0	0
Sbno2	0.457641	2.95303	2.49539	0	0
Gpm6b	1.20458	3.73066	2.52608	0	0
Scara5	0.241701	2.78615	2.54445	0	0
Fth1	1.71698	4.28133	2.56435	0	0
Pde10a	1.16896	3.80065	2.63169	2.95168e-228	6.71802e-224
Pde4d	2.69602	5.59604	2.90002	0	0
Gm17268	0.0614537	2.98285	2.92139	5.32021e-112	1.21088e-107
Cxcl1	0.015157	3.09703	3.08187	0	0
Cp	2.91618	6.20125	3.28508	0	0
Ttr	0.0927167	3.61157	3.51885	0	0
Mt2	0.0967828	3.62225	3.52547	0	0
Apod	2.54868	6.18298	3.63431	0	0
Lcn2	0.00742688	3.75007	3.74265	0	0
Il1r1	0.170989	4.07958	3.90859	0	0
Saa3	0.0151655	4.06442	4.04926	0	0
Mt1	0.411685	4.86333	4.45164	0	0

## Sheet: Glia
gene	log2(average expression control + 1)	log2(average expression infected + 1)	avg_log2FC	p_val	p_val_adj
Tsix	3.06244	0.739842	-2.3226	1.36599e-204	3.10899e-200
Xist	5.7676	3.64789	-2.11971	9.27779e-173	2.11162e-168
Tnc	4.82501	3.03851	-1.7865	2.33219e-91	5.30807e-87
Wdr17	4.58606	3.05409	-1.53196	3.3759e-81	7.68354e-77
Cntnap5a	1.83443	0.378637	-1.4558	2.57726e-32	5.86584e-28
Mgat5	2.29327	0.995081	-1.29819	3.70957e-59	8.44297e-55
Opcml	3.53666	2.28136	-1.2553	6.49239e-40	1.47767e-35
Ppp2r2b	4.3045	3.06879	-1.23571	1.60333e-73	3.64917e-69
AC129186.1	1.58832	0.407766	-1.18056	5.01227e-71	1.14079e-66
Epha5	3.8933	2.71421	-1.17909	1.67958e-50	3.82272e-46
Rgs7	3.19493	2.01663	-1.1783	3.14825e-50	7.16543e-46
Gm29266	1.9763	0.804525	-1.17177	1.42714e-56	3.24817e-52
Adcy2	3.35713	2.20726	-1.14987	2.40645e-44	5.47709e-40
Gabrg3	1.76834	0.633831	-1.13451	1.91918e-51	4.36804e-47
Cntn5	1.87073	0.761031	-1.1097	5.21022e-25	1.18585e-20
Fabp7	2.94198	1.84891	-1.09307	9.73672e-54	2.21608e-49
Mgat4c	1.66452	0.579945	-1.08457	1.29517e-35	2.94781e-31
Fgf14	3.66957	2.61426	-1.05531	9.07768e-45	2.06608e-40
Dcc	2.99326	1.93962	-1.05363	3.37548e-20	7.68259e-16
Gm48742	2.27128	1.22451	-1.04677	2.03441e-47	4.63031e-43
Tspan7	3.031	1.99335	-1.03765	4.7501e-38	1.08112e-33
Ptn	5.16569	4.13382	-1.03187	1.26323e-64	2.87512e-60
Negr1	3.76068	2.73436	-1.02631	2.7472e-40	6.25264e-36
Ednrb	1.94176	0.933412	-1.00835	7.40676e-46	1.68578e-41
Ddx3y	0	0.756708	0.756708	2.37103e-11	5.39647e-07
Il1r1	0.130978	1.1347	1.00372	5.22775e-11	1.18983e-06
Fstl1	1.50569	2.51102	1.00532	3.06773e-13	6.98215e-09
Eif2s3y	0	1.00604	1.00604	9.68515e-16	2.20434e-11
St6gal1	0.980509	2.00386	1.02335	9.11318e-12	2.07416e-07
Neat1	1.53989	2.56518	1.02529	5.27259e-09	0.000120004
Clip3	0.591961	1.62783	1.03587	4.52882e-11	1.03076e-06
Osmr	0.216471	1.25573	1.03926	1.38625e-13	3.1551e-09
Pik3r1	1.05469	2.10189	1.0472	8.61675e-13	1.96117e-08
Nfkbia	0.798434	1.84928	1.05084	1.08121e-13	2.46084e-09
Klhl29	1.45222	2.53677	1.08455	4.36648e-11	9.9381e-07
Rmst	0.927823	2.03188	1.10406	5.27296e-11	1.20013e-06
Pdgfd	1.92046	3.03033	1.10988	3.15683e-19	7.18494e-15
Timp1	0.152548	1.27378	1.12123	3.34755e-15	7.61903e-11
Csf3	0	1.15676	1.15676	1.05063e-17	2.39124e-13
Trpm3	2.12807	3.32282	1.19474	6.42717e-20	1.46282e-15
Plce1	2.8494	4.04966	1.20026	4.48171e-43	1.02004e-38
Erbin	1.74634	2.95509	1.20875	7.00634e-26	1.59464e-21
Ier3	0.208972	1.421	1.21203	6.79885e-18	1.54742e-13
Itpr2	1.45883	2.67543	1.2166	6.20747e-21	1.41282e-16
Aspg	0.871263	2.09678	1.22552	2.41414e-17	5.49459e-13
Dst	2.00262	3.23417	1.23155	1.33724e-33	3.04357e-29
Serping1	0.321491	1.55439	1.2329	2.16459e-17	4.92662e-13
Tgfbr3	0.568606	1.81759	1.24898	4.89096e-10	1.11318e-05
Pappa	0.138311	1.40162	1.26331	3.62053e-12	8.24032e-08
Ifitm1	0.190751	1.46519	1.27444	7.51145e-21	1.70961e-16
Zbtb16	0.0336254	1.31797	1.28434	4.58195e-20	1.04285e-15
Mical2	0.214775	1.53192	1.31715	6.52648e-20	1.48543e-15
Cebpd	0.305613	1.62357	1.31796	3.4636e-20	7.88314e-16
Ifitm3	0.408395	1.73548	1.32708	2.3226e-19	5.28625e-15
Susd6	1.31714	2.67077	1.35363	1.44614e-22	3.29142e-18
Ggta1	1.31701	2.69288	1.37587	6.24698e-26	1.42181e-21
Ap4e1	0.43588	1.81739	1.38151	7.37282e-17	1.67805e-12
Klf9	1.12875	2.52586	1.39711	5.98367e-29	1.36188e-24
Cxcl1	0	1.40231	1.40231	3.70489e-23	8.43233e-19
Meg3	2.93072	4.34498	1.41425	3.69397e-21	8.40748e-17
Olfr1033	0.202784	1.65912	1.45634	6.24489e-20	1.42134e-15
Farp1	2.58293	4.04468	1.46175	1.66931e-65	3.79934e-61
Npas2	0.612821	2.07603	1.46321	3.726e-25	8.48037e-21
Uty	0	1.47505	1.47505	3.61427e-25	8.22607e-21
Lbp	0.130092	1.65168	1.52159	4.23955e-22	9.64921e-18
Sorbs1	2.77505	4.31644	1.54138	5.02607e-70	1.14393e-65
Serpina3n	0.0186186	1.57804	1.55942	3.10359e-24	7.06378e-20
A2m	0.563648	2.14201	1.57836	8.56921e-15	1.95035e-10
Hif3a	0.226838	1.82213	1.59529	3.17874e-31	7.23482e-27
Cpne8	0.678265	2.40874	1.73048	8.4755e-33	1.92902e-28
Nfasc	0.321726	2.14227	1.82054	6.84859e-37	1.55874e-32
Kiz	0.830913	2.6949	1.86399	1.52027e-32	3.46014e-28
Kcnt1	0.0906194	1.97601	1.88539	7.48629e-39	1.70388e-34
Slc39a14	0.78223	2.71959	1.93736	3.912e-48	8.90372e-44
Cp	0.356915	2.35156	1.99464	2.46885e-31	5.6191e-27
Sbno2	0.54046	2.5508	2.01034	6.74285e-45	1.53467e-40
Fth1	1.5759	3.82017	2.24427	2.10703e-105	4.7956e-101
Lcn2	0	2.41635	2.41635	2.9455e-62	6.70396e-58
Saa3	0	2.50503	2.50503	3.49769e-65	7.96074e-61
Apod	0.390769	2.99727	2.6065	1.70241e-74	3.87468e-70
Fkbp5	0.154261	3.00956	2.8553	1.81199e-85	4.12408e-81
Mt2	0.522446	3.6065	3.08406	1.01125e-124	2.30161e-120
Ttr	0.236991	3.52508	3.28809	1.13551e-89	2.58442e-85
Mt1	1.04614	4.69059	3.64444	1.04435e-185	2.37695e-181

## Sheet: Mural cells
gene	log2(average expression control + 1)	log2(average expression infected + 1)	avg_log2FC	p_val	p_val_adj
Tsix	2.7406	0.575229	-2.16537	7.9954e-50	1.81975e-45
Xist	5.48696	3.46418	-2.02278	4.65314e-67	1.05905e-62
Inpp4b	4.56982	2.5544	-2.01542	7.16525e-42	1.63081e-37
Unc13c	2.23305	0.287248	-1.94581	9.36261e-26	2.13093e-21
Specc1	2.98858	1.11935	-1.86923	2.89908e-35	6.59831e-31
Adamts16	1.99634	0.176964	-1.81938	1.91385e-25	4.35591e-21
Plce1	4.0868	2.50572	-1.58108	6.88376e-35	1.56674e-30
Sept4	3.02529	1.44508	-1.5802	2.32024e-34	5.28087e-30
Sema5b	2.05682	0.524865	-1.53195	5.33686e-23	1.21467e-18
Gm32067	1.53168	0.048335	-1.48334	1.01329e-27	2.30624e-23
Piezo2	2.41718	0.934048	-1.48313	1.6392e-10	3.73082e-06
Zeb1	4.18128	2.73644	-1.44484	2.74316e-31	6.24342e-27
Igf2r	2.45441	1.02854	-1.42587	1.00211e-27	2.2808e-23
Col8a1	2.08174	0.68339	-1.39835	3.56486e-08	0.000811361
Airn	4.70313	3.3178	-1.38532	1.87718e-34	4.27246e-30
Ldb2	2.51658	1.13876	-1.37782	5.93749e-25	1.35137e-20
Stac	2.49854	1.15765	-1.34088	3.89135e-19	8.8567e-15
Cdh11	2.8719	1.55738	-1.31452	6.14021e-22	1.39751e-17
Ptn	3.80118	2.48992	-1.31127	5.36231e-19	1.22046e-14
Tnfrsf19	1.8946	0.584474	-1.31012	4.31911e-17	9.8303e-13
Myl9	1.83469	0.531786	-1.3029	7.85698e-17	1.78825e-12
Kirrel3	1.93551	0.633768	-1.30174	1.06394e-10	2.42152e-06
Dock10	3.15821	1.8952	-1.26302	3.38976e-26	7.7151e-22
Col25a1	2.14331	0.883625	-1.25969	1.25578e-08	0.000285816
Cdh2	2.30445	1.05647	-1.24798	1.31381e-16	2.99024e-12
Gucy1a2	3.80231	2.56841	-1.2339	1.32253e-26	3.01007e-22
Uaca	3.4251	2.19905	-1.22604	1.87793e-15	4.27417e-11
Cacnb2	4.08122	2.86069	-1.22053	1.68019e-18	3.82412e-14
Gpc6	5.53038	4.31421	-1.21617	3.77372e-13	8.58899e-09
Auts2	4.79784	3.58341	-1.21443	1.61204e-29	3.669e-25
Olfml2a	1.25719	0.103619	-1.15357	3.31587e-14	7.54692e-10
Nrep	1.71074	0.567711	-1.14303	5.89602e-19	1.34193e-14
Rgs6	3.65793	2.51745	-1.14048	2.8344e-17	6.4511e-13
Sned1	2.4818	1.36226	-1.11953	2.39465e-11	5.45022e-07
Gulp1	2.60483	1.48601	-1.11882	1.32305e-13	3.01125e-09
Fry	3.72684	2.61122	-1.11562	2.31491e-22	5.26873e-18
Ebf2	2.97862	1.86621	-1.11241	5.34302e-10	1.21607e-05
Sept7	2.86588	1.7559	-1.10999	2.25976e-17	5.14321e-13
Grin2b	1.33073	0.225586	-1.10514	1.25186e-10	2.84924e-06
Fam110b	2.67319	1.57352	-1.09967	2.65981e-20	6.05373e-16
Sh3rf1	2.80232	1.71151	-1.09081	2.07934e-11	4.73257e-07
Fermt2	2.70714	1.62684	-1.08031	8.03841e-19	1.82954e-14
Sntb1	2.91448	1.83781	-1.07666	1.15173e-17	2.62133e-13
Astn2	2.24292	1.17417	-1.06876	5.52052e-10	1.25647e-05
Gm12158	1.43655	0.368028	-1.06853	2.75593e-18	6.27249e-14
Dgkb	1.90155	0.836131	-1.06541	1.82633e-10	4.15672e-06
Ano1	3.01041	1.94635	-1.06406	6.30935e-17	1.43601e-12
Dkk2	1.37563	0.32356	-1.05207	5.95335e-12	1.35498e-07
Ccdc3	1.70232	0.651448	-1.05087	5.12123e-14	1.16559e-09
Nr6a1	2.60678	1.5601	-1.04668	1.83694e-17	4.18089e-13
Col3a1	3.20504	2.15893	-1.0461	2.50632e-14	5.70438e-10
Trpc3	3.65196	2.63468	-1.01729	1.2938e-14	2.94469e-10
Zeb2	5.41573	4.3999	-1.01583	1.48241e-27	3.37397e-23
Sh3kbp1	2.08629	1.07198	-1.01431	9.16614e-15	2.08621e-10
Galnt16	1.73678	0.723569	-1.01321	5.3857e-14	1.22579e-09
Rapgef2	3.24813	2.23866	-1.00946	4.17068e-14	9.49246e-10
Ddx3y	0	0.899993	0.899993	4.8327e-08	0.00109992
Eif2s3y	0	0.95546	0.95546	6.56003e-09	0.000149306
Tacc1	2.08459	3.09097	1.00638	3.12943e-09	7.12258e-05
Scara5	0	1.03665	1.03665	3.47135e-08	0.000790079
Serpina3n	0	1.03767	1.03767	3.3497e-09	7.62392e-05
Tmem100	0.179659	1.21934	1.03968	6.54625e-08	0.00148993
Trpc4	0.94986	2.00108	1.05122	1.4036e-06	0.031946
Ell2	0.426347	1.50063	1.07428	2.31145e-07	0.00526085
Tnip1	0.173552	1.25048	1.07692	2.72772e-08	0.000620829
Steap4	1.07723	2.15568	1.07846	9.1952e-07	0.0209283
Tmem87b	0.404442	1.49027	1.08582	9.1206e-07	0.0207585
S100a9	0.0678241	1.1622	1.09437	1.59637e-08	0.000363333
Lox	0.273207	1.37072	1.09751	5.15595e-07	0.0117349
Ampd3	0.122847	1.22292	1.10007	2.2765e-07	0.00518132
Acsl4	0.298148	1.39906	1.10091	2.27781e-07	0.0051843
Epn2	1.11965	2.24321	1.12356	6.08313e-08	0.00138452
Abi1	1.36757	2.49421	1.12664	3.27505e-08	0.000745402
Ptpn9	2.25415	3.38324	1.12909	2.68414e-14	6.10911e-10
Sdc4	0.122274	1.25178	1.1295	9.28796e-08	0.00211394
9530026P05Rik	1.03776	2.17965	1.14189	2.15756e-07	0.00491062
Ccnd3	1.3872	2.53865	1.15144	1.71212e-10	3.89678e-06
Ppp1r2	0.783042	1.95293	1.16989	5.40048e-07	0.0122915
Bicc1	2.31529	3.49372	1.17843	1.87184e-12	4.26031e-08
Pid1	3.14187	4.32042	1.17855	3.82847e-07	0.0087136
Gimap6	1.06675	2.25299	1.18625	3.36585e-08	0.000766067
Sbno2	0.864432	2.05252	1.18809	3.87385e-09	8.81688e-05
Klf9	1.33601	2.54314	1.20713	2.5644e-10	5.83657e-06
Adamts1	0.275872	1.48335	1.20748	6.72707e-10	1.53108e-05
Gm29554	0.0142327	1.22938	1.21515	1.47881e-09	3.36578e-05
Susd6	2.13361	3.35238	1.21877	7.75192e-12	1.76434e-07
Ifitm3	1.2666	2.49103	1.22443	2.90159e-10	6.60402e-06
Fstl1	2.33273	3.56397	1.23124	6.5767e-13	1.49686e-08
Adamts4	0.195816	1.42957	1.23375	8.90603e-10	2.02701e-05
Il6st	1.28656	2.52705	1.2405	3.23827e-10	7.37031e-06
Emcn	0.998837	2.24559	1.24675	1.4898e-07	0.00339078
Glis3	0.825165	2.0749	1.24974	3.09999e-07	0.00705557
Kif21a	0.0917042	1.34524	1.25354	4.60491e-08	0.00104808
Cyp1b1	0.501575	1.76029	1.25871	6.74941e-11	1.53616e-06
1200007C13Rik	0	1.26045	1.26045	7.81757e-11	1.77928e-06
Cxcl2	0	1.27067	1.27067	1.28051e-08	0.000291445
Rhoj	2.59255	3.87655	1.28401	1.14976e-15	2.61686e-11
Nfkb1	1.38131	2.68179	1.30048	1.00644e-11	2.29067e-07
Cebpb	0.334921	1.64079	1.30587	6.4887e-14	1.47683e-09
Neat1	0.85772	2.17939	1.32167	4.61507e-09	0.000105039
Relb	0.275127	1.60342	1.3283	3.80892e-10	8.6691e-06
Pde4d	3.94798	5.27682	1.32884	7.97295e-16	1.81464e-11
Epb41	0.671169	2.00003	1.32886	6.80309e-11	1.54838e-06
Timp1	0.173274	1.5208	1.34753	3.2534e-11	7.40473e-07
Pappa	0.385029	1.73965	1.35462	1.34802e-07	0.00306809
Hif3a	0.60648	1.99087	1.3844	2.7332e-10	6.22077e-06
Ier3	0.338732	1.73161	1.39288	5.7979e-12	1.3196e-07
Ptpn3	0.428905	1.84783	1.41893	1.72186e-08	0.000391896
Ccl2	0.215009	1.663	1.448	2.37581e-08	0.000540735
Ifitm1	0.478886	1.93147	1.45259	5.51998e-13	1.25635e-08
Pde4b	1.17847	2.64355	1.46508	3.45804e-13	7.87051e-09
Hp	0.0343491	1.50255	1.4682	2.08362e-10	4.74232e-06
Pawr	1.5889	3.0958	1.5069	2.61906e-11	5.96098e-07
Galnt18	1.54145	3.06145	1.52	9.13677e-11	2.07953e-06
Fndc3b	2.20108	3.76462	1.56354	1.96838e-19	4.48004e-15
Hdac9	0.805207	2.38417	1.57896	1.93341e-11	4.40045e-07
Cyp7b1	2.6306	4.22043	1.58983	1.1156e-11	2.5391e-07
Igfbp3	0.236829	1.83704	1.60021	1.97828e-11	4.50257e-07
Plat	0.444501	2.04871	1.60421	1.1077e-08	0.000252113
Abcc4	0.341305	1.95283	1.61153	3.80707e-14	8.66488e-10
Uty	0.0248428	1.63724	1.61239	5.06947e-15	1.15381e-10
Birc3	0.319953	1.93376	1.61381	2.49768e-14	5.68471e-10
Lbp	0.114746	1.75858	1.64383	7.80664e-15	1.77679e-10
Sod2	0.255455	1.91513	1.65968	4.92833e-17	1.12169e-12
Osmr	0.57856	2.24048	1.66192	1.86412e-15	4.24275e-11
Cpm	0.132873	1.80546	1.67259	2.22373e-10	5.0612e-06
Kalrn	1.86371	3.56083	1.69712	3.87909e-21	8.8288e-17
Lncpint	0.34748	2.04846	1.70098	1.59758e-11	3.6361e-07
Slc39a14	0.265652	1.97176	1.70611	7.7647e-14	1.76725e-09
Ednrb	0.047393	1.765	1.7176	1.71926e-14	3.91304e-10
Pld1	1.31193	3.03137	1.71944	1.09646e-21	2.49554e-17
Irak3	0.136828	1.87603	1.7392	9.04472e-17	2.05858e-12
Gm17268	0.60127	2.34673	1.74546	3.88056e-08	0.000883215
Spidr	0.831421	2.58238	1.75095	6.07968e-17	1.38373e-12
Il1r1	1.16871	2.92531	1.7566	9.52648e-15	2.16823e-10
Kiz	1.03705	2.81526	1.77821	7.97655e-19	1.81546e-14
Cfh	2.07685	3.86305	1.78619	1.08575e-13	2.47116e-09
Cebpd	0.131379	1.94879	1.81741	3.07444e-19	6.99744e-15
Ap4e1	0.638016	2.46233	1.82431	5.50505e-17	1.25295e-12
Lepr	0.641849	2.47075	1.8289	1.46515e-12	3.33468e-08
Csf3	0	1.83324	1.83324	1.07883e-17	2.45542e-13
Nfkbia	0.327668	2.17442	1.84675	1.03757e-20	2.36151e-16
Gpm6b	1.35448	3.21521	1.86073	1.57614e-13	3.58729e-09
Serping1	1.09663	3.02904	1.93241	2.04262e-25	4.64901e-21
Pla1a	0.431364	2.38026	1.9489	1.21466e-20	2.76456e-16
Il6	0.0209169	2.006	1.98508	7.00672e-14	1.59473e-09
Fmnl2	1.82331	3.83087	2.00756	3.5294e-23	8.0329e-19
Carmil1	0.901568	2.91541	2.01384	2.0315e-22	4.6237e-18
Adamts9	1.55794	3.58896	2.03103	1.91695e-19	4.36297e-15
Gm16685	0	2.04625	2.04625	6.7625e-12	1.53915e-07
Fth1	1.90532	4.05822	2.1529	9.0414e-51	2.05782e-46
Olfr1033	0.672263	2.83008	2.15781	1.43061e-21	3.25606e-17
Lrmda	0.629362	2.95996	2.33059	3.11292e-18	7.08501e-14
Bmper	0.159138	2.55473	2.39559	5.69353e-21	1.29585e-16
Cxcl1	0	2.43261	2.43261	5.43747e-23	1.23757e-18
Pde10a	0.86845	3.36304	2.49459	7.70612e-24	1.75391e-19
Apod	0.769488	3.45856	2.68908	1.8243e-36	4.15211e-32
Ngf	0.663835	3.42492	2.76108	1.97984e-16	4.50612e-12
Fkbp5	0.451031	3.29099	2.83996	7.85268e-38	1.78727e-33
Cp	2.23502	5.11148	2.87647	2.2003e-61	5.00789e-57
Lcn2	0	2.89932	2.89932	7.24589e-39	1.64917e-34
Zbtb16	0.0294409	3.11294	3.0835	1.44811e-42	3.2959e-38
Mt2	0.077685	3.53175	3.45406	8.00394e-65	1.8217e-60
Saa3	0.0222395	3.56429	3.54205	2.7121e-50	6.17275e-46
Ttr	0.213727	3.90678	3.69306	1.49912e-55	3.41201e-51
Mt1	0.564172	4.66903	4.10486	2.66805e-92	6.07248e-88

[truncated: 4 more sheets: Neurons, Macrophages, Osteoblasts, Osteoclasts]
