# Supplementary material for: Bacterial meningitis in the early postnatal mouse studied at single-cell resolution
Source: eLife. 2023 Jun 15;12:e86130. doi: 10.7554/eLife.86130 (PMC10270687; doi:10.7554/eLife.86130)
Supplement: Supplementary file 5. — FC, fold change. [file elife-86130-supp5.xlsx]

## Sheet: Resident macrophages, CCL2-
gene	avg_log2FC	p_val	p_val_adj
Tcf24	-2.90879	3.06369e-131	5.06551e-127
Arsb	-2.70259	7.82293e-132	1.29344e-127
Samd4	-2.50648	5.73996e-107	9.49045e-103
Tbc1d4	-2.38059	4.38383e-141	7.24823e-137
Mef2c	-2.30038	1.18714e-187	1.96281e-183
Ddx60	-2.25098	3.54583e-117	5.86267e-113
Bank1	-2.24796	6.26523e-104	1.03589e-99
Rnf150	-2.20378	3.47905e-135	5.75225e-131
Snx29	-2.17971	8.35252e-144	1.38101e-139
Mctp1	-2.09693	1.92494e-129	3.1827e-125
Cd180	-2.05406	4.01787e-84	6.64315e-80
Dse	-2.0228	7.39538e-121	1.22275e-116
Ctsc	-2.0196	1.04096e-85	1.72112e-81
Cd209f	-2.01522	8.6135e-50	1.42416e-45
Slc40a1	-2.00997	4.34764e-76	7.18838e-72
P3h2	-1.98982	6.42498e-77	1.06231e-72
Agmo	-1.98128	1.90049e-80	3.14227e-76
Slc8a1	-1.92046	1.77919e-146	2.94171e-142
Tsix	-1.88164	1.40014e-90	2.315e-86
Myo5a	-1.86475	3.57185e-124	5.9057e-120
Abhd12	-1.85276	4.51121e-83	7.45883e-79
Anapc15	-1.83596	1.63788e-81	2.70807e-77
Cmah	-1.82185	8.6498e-64	1.43016e-59
Zfp710	-1.80242	5.76652e-94	9.53436e-90
Gm26522	-1.79858	1.84013e-45	3.04247e-41
Hpgds	-1.79269	5.82482e-106	9.63075e-102
Reps2	-1.78771	2.2168e-72	3.66526e-68
Cacna1a	-1.78386	2.86606e-98	4.73875e-94
St8sia4	-1.77934	9.7674e-63	1.61494e-58
Myo1f	-1.77381	2.11114e-78	3.49056e-74
Gm13710	-1.76838	5.38457e-73	8.90285e-69
Gas6	-1.76045	3.61038e-93	5.96941e-89
Abcg3	-1.74644	8.56324e-63	1.41585e-58
Plekhg5	-1.73479	1.67904e-64	2.77612e-60
Rgs7bp	-1.72594	1.30966e-54	2.16539e-50
Slc16a7	-1.70616	6.26323e-70	1.03556e-65
Ms4a7	-1.70581	2.99466e-72	4.95138e-68
Wwp1	-1.70058	7.58317e-107	1.2538e-102
Arhgap15	-1.69446	1.49009e-58	2.46371e-54
Cyp27a1	-1.67876	1.24657e-66	2.06108e-62
Ttc28	-1.6636	2.07141e-83	3.42487e-79
Rasal2	-1.64971	6.01311e-101	9.94208e-97
Stard8	-1.64527	1.01118e-76	1.67188e-72
Tln2	-1.63725	3.62864e-62	5.99959e-58
Ednrb	-1.59215	9.87077e-59	1.63203e-54
Tmcc3	-1.58835	5.76859e-46	9.53779e-42
Slc9a9	-1.58681	5.81681e-166	9.61752e-162
Arhgef3	-1.58566	1.00344e-85	1.65908e-81
Gm31243	-1.57189	1.62723e-51	2.69047e-47
Dlc1	-1.56353	9.83251e-55	1.62571e-50
Ehd4	-1.55483	6.97459e-87	1.15318e-82
P2rx7	-1.55478	5.15683e-50	8.52631e-46
Gatm	-1.53928	8.3813e-77	1.38576e-72
Cx3cr1	-1.5284	1.15127e-45	1.90352e-41
Gm4951	-1.528	3.96282e-62	6.55213e-58
Tbxas1	-1.52401	3.48246e-66	5.75791e-62
Gna12	-1.5223	2.54689e-63	4.21103e-59
Fry	-1.51266	9.6376e-53	1.59348e-48
Pnpla7	-1.49271	6.0562e-67	1.00133e-62
Cd36	-1.48755	7.07942e-43	1.17051e-38
Colec12	-1.48591	6.43634e-70	1.06418e-65
Hpgd	-1.48099	6.05006e-32	1.00032e-27
Man1c1	-1.47309	3.92936e-66	6.4968e-62
Park2	-1.46363	1.01331e-57	1.67541e-53
Camk1	-1.45938	4.45569e-59	7.36704e-55
Fgd2	-1.45741	1.04569e-61	1.72895e-57
Gpr160	-1.45635	5.01562e-52	8.29283e-48
Xist	-1.45004	1.18358e-118	1.95693e-114
Smyd3	-1.4356	1.25798e-56	2.07994e-52
Mbnl1	-1.43334	1.67685e-88	2.77251e-84
Prkca	-1.42376	4.15409e-58	6.86837e-54
Acss1	-1.41982	4.46058e-46	7.37512e-42
Ssbp2	-1.41603	3.29241e-51	5.44367e-47
Abca9	-1.41435	2.16294e-66	3.5762e-62
Snx30	-1.40224	4.57824e-59	7.56966e-55
Prkg1	-1.38801	5.21149e-34	8.61669e-30
Nfxl1	-1.38182	2.60032e-52	4.29936e-48
Ly86	-1.36572	1.67129e-44	2.76331e-40
Plxnc1	-1.35664	4.77408e-49	7.89346e-45
Fam105a	-1.35049	3.7521e-48	6.20372e-44
Fli1	-1.34932	5.08256e-84	8.4035e-80
AC149090.1	-1.34851	5.87035e-62	9.70604e-58
Itga4	-1.3315	1.26162e-47	2.08596e-43
Hacd4	-1.32141	1.06909e-42	1.76764e-38
Fcrls	-1.31461	1.03837e-44	1.71685e-40
Camk1d	-1.30085	1.50028e-62	2.48056e-58
Osbpl8	-1.29101	1.93839e-59	3.20494e-55
Man2b1	-1.27692	1.14855e-55	1.89902e-51
Arhgap18	-1.27486	8.14562e-49	1.3468e-44
Plxna4	-1.2709	4.27451e-35	7.06747e-31
Apba1	-1.26524	6.16104e-33	1.01867e-28
Cass4	-1.2609	2.34777e-32	3.8818e-28
Ulk2	-1.24751	2.33415e-52	3.85928e-48
Stab1	-1.24153	2.50912e-93	4.14857e-89
Spats2l	-1.23657	2.39242e-35	3.95563e-31
Rhobtb1	-1.23596	5.67787e-52	9.3878e-48
St6gal1	-1.23419	1.07375e-49	1.77534e-45
Mitf	-1.22442	3.13871e-46	5.18954e-42
Dgkd	-1.21844	2.06681e-42	3.41726e-38
Wasl	-1.21197	8.24656e-45	1.36349e-40
Gm30382	-1.20991	2.45466e-27	4.05853e-23
Lmo2	-1.20452	6.96021e-41	1.1508e-36
Iigp1	-1.20353	2.07188e-16	3.42565e-12
Fgd4	-1.20015	1.10497e-42	1.82696e-38
Selenop	-1.19805	3.06835e-42	5.0732e-38
Gab3	-1.19485	2.54623e-46	4.20993e-42
Ptprk	-1.19435	6.70963e-43	1.10937e-38
Ints6l	-1.18466	1.63452e-41	2.70251e-37
Iqgap2	-1.18431	1.19795e-45	1.98069e-41
Snx9	-1.17594	1.35555e-44	2.24126e-40
Stard9	-1.17306	1.46458e-43	2.42154e-39
Ptpra	-1.16286	3.3739e-48	5.5784e-44
Nr3c2	-1.15956	2.42661e-31	4.01215e-27
Dab2	-1.15827	1.1604e-108	1.9186e-104
Pip4k2a	-1.15237	1.26895e-59	2.09808e-55
Wdr7	-1.14473	8.98517e-38	1.48561e-33
Cltc	-1.13657	1.35281e-67	2.23674e-63
Rasa1	-1.12939	1.14577e-38	1.89441e-34
Cd300a	-1.12811	4.61681e-34	7.63343e-30
Ppp3ca	-1.12399	1.31403e-64	2.17262e-60
Sec14l1	-1.12351	2.79845e-33	4.62695e-29
Daglb	-1.12003	3.86366e-34	6.38817e-30
5033421B08Rik	-1.11798	1.04177e-32	1.72246e-28
Pacs1	-1.11517	3.94022e-38	6.51476e-34
Ralgps2	-1.10957	1.09729e-32	1.81426e-28
Gm5086	-1.09915	4.40308e-32	7.28006e-28
Itga6	-1.09848	3.39078e-29	5.60631e-25
Csf1r	-1.09322	1.31133e-53	2.16815e-49
Crebrf	-1.09307	1.44326e-30	2.38629e-26
Fcho2	-1.09287	1.17613e-53	1.94461e-49
Mtss1	-1.09009	2.08943e-50	3.45466e-46
Rgs10	-1.08573	4.40505e-36	7.28331e-32
Rasgrp3	-1.08511	8.73929e-32	1.44495e-27
Dock8	-1.0833	2.31036e-49	3.81995e-45
Wls	-1.08046	5.76125e-41	9.52565e-37
Ptpn18	-1.07752	7.33671e-31	1.21305e-26
Rassf3	-1.07648	8.27132e-29	1.36758e-24
Itm2b	-1.07259	7.5166e-40	1.2428e-35
Tnfrsf11a	-1.07187	2.08057e-34	3.44001e-30
Atp5o	-1.0698	3.07484e-47	5.08393e-43
Raph1	-1.06491	1.00474e-40	1.66124e-36
Ogt	-1.0617	1.99259e-42	3.29454e-38
Ccm2	-1.06006	7.33066e-39	1.21205e-34
Lama3	-1.05074	2.04531e-22	3.38172e-18
Ccdc50	-1.04804	3.77656e-44	6.24416e-40
Arhgef6	-1.04785	6.46017e-35	1.06813e-30
Specc1	-1.04699	8.92438e-31	1.47556e-26
Hk3	-1.04614	2.58351e-39	4.27157e-35
Ccl24	-1.04442	2.62111e-25	4.33375e-21
Slc38a9	-1.04329	1.36405e-33	2.25532e-29
Ppp1r9a	-1.03916	4.42554e-49	7.31718e-45
Pkig	-1.02157	6.77292e-27	1.11984e-22
Adam33	-1.02001	3.04304e-29	5.03137e-25
Adcy9	-1.01888	5.81597e-31	9.61613e-27
Mfsd11	-1.01819	1.19485e-30	1.97557e-26
Tslp	-1.01543	5.78437e-27	9.56387e-23
Akap10	-1.01531	9.4017e-38	1.55448e-33
Ric8b	-1.0125	1.14791e-27	1.89795e-23
Ivns1abp	-1.0074	2.49433e-29	4.12412e-25
Gm454	-1.0051	4.30756e-27	7.12212e-23
2610507B11Rik	-1.00499	1.97916e-31	3.27235e-27
Arhgap39	-1.00436	6.64664e-29	1.09896e-24
Gpr183	-1.00335	1.79372e-29	2.96574e-25
Retreg1	-1.00304	1.3037e-33	2.15554e-29
Kctd12	-1.00227	1.89215e-27	3.12848e-23
Ankrd33b	1.00129	5.89532e-27	9.74733e-23
Jdp2	1.00253	1.01225e-20	1.67365e-16
Fermt3	1.00419	1.0911e-31	1.80402e-27
Mmp14	1.00497	2.98755e-22	4.93962e-18
Fyb	1.00939	9.85872e-36	1.63004e-31
Prss16	1.01002	1.99261e-34	3.29458e-30
Ap4e1	1.01339	8.10852e-20	1.34066e-15
Adam8	1.01417	5.5531e-26	9.1815e-22
Mad1l1	1.01468	1.33604e-08	0.000220901
Timp1	1.01703	2.93336e-27	4.85001e-23
Lpar1	1.02222	1.06696e-22	1.76411e-18
Il18rap	1.0249	1.01699e-32	1.68149e-28
Cebpb	1.0277	1.53567e-22	2.53908e-18
Hsbp1	1.03116	1.50621e-20	2.49038e-16
S100a9	1.03439	1.54827e-30	2.55991e-26
Enpp2	1.03594	4.62964e-10	7.65464e-06
Arid5b	1.03804	1.75778e-24	2.90632e-20
1600014C10Rik	1.04214	1.68312e-21	2.78288e-17
Ddx3y	1.04676	4.15203e-27	6.86497e-23
Chka	1.05058	8.4161e-20	1.39152e-15
Ifitm3	1.05074	2.40679e-25	3.97939e-21
Cd47	1.05345	2.08304e-17	3.4441e-13
Csf2rb	1.05391	1.76662e-24	2.92092e-20
Rnf149	1.05797	2.91749e-24	4.82378e-20
Tlcd2	1.05982	1.01153e-27	1.67246e-23
Creb5	1.06083	4.49955e-21	7.43955e-17
Luzp2	1.06476	8.11412e-16	1.34159e-11
B4galt1	1.07368	3.63249e-24	6.00597e-20
Tet2	1.07986	4.83044e-24	7.98664e-20
Gm15987	1.08045	1.12159e-26	1.85443e-22
Gm15283	1.0813	8.57503e-23	1.4178e-18
Pou2f2	1.0872	1.18675e-21	1.96217e-17
Trps1	1.09012	1.36562e-35	2.25792e-31
Filip1l	1.09339	4.22591e-28	6.98712e-24
Dok3	1.09573	1.74063e-30	2.87796e-26
Ncoa1	1.09916	6.75714e-31	1.11723e-26
Cmss1	1.10055	3.87792e-22	6.41175e-18
Trpm3	1.10871	6.03028e-25	9.97047e-21
Nadk	1.11218	2.73874e-23	4.52823e-19
Gna13	1.11427	1.54659e-21	2.55713e-17
Znrf1	1.12128	2.5972e-26	4.29421e-22
Aff1	1.12477	5.08398e-26	8.40586e-22
Slc16a12	1.13337	1.91226e-19	3.16174e-15
Steap4	1.13465	7.19246e-33	1.1892e-28
Vapa	1.13836	1.11918e-26	1.85046e-22
Rhoq	1.14211	1.89983e-24	3.14118e-20
Spata13	1.14288	1.08783e-33	1.79861e-29
Mcoln2	1.14921	3.40082e-27	5.62291e-23
Agap1	1.15377	5.27221e-17	8.71707e-13
Mrpl52	1.15796	4.18574e-32	6.9207e-28
Ncf1	1.16075	1.89766e-26	3.13759e-22
Pabpc1	1.16437	3.0804e-26	5.09313e-22
Gm15675	1.16989	3.51191e-35	5.8066e-31
Etv6	1.16995	8.15876e-51	1.34897e-46
Sash1	1.19247	3.20103e-39	5.29258e-35
Stat3	1.19274	5.68256e-36	9.39554e-32
Ms4a4a	1.19353	8.12019e-34	1.34259e-29
Dennd4a	1.19476	8.68584e-23	1.43612e-18
Ifitm1	1.20834	3.45942e-32	5.71981e-28
Lpcat2	1.22325	5.79117e-24	9.57513e-20
Klf9	1.22499	5.29268e-34	8.75091e-30
Rbm26	1.22594	5.53074e-45	9.14452e-41
Alpk1	1.22791	7.62904e-25	1.26139e-20
Pde7b	1.23145	2.00342e-21	3.31246e-17
Ehd1	1.23667	2.72608e-39	4.5073e-35
Il1r1	1.2394	2.8081e-32	4.64291e-28
Nfkb1	1.23956	2.8035e-37	4.6353e-33
Man2a1	1.24335	3.70674e-34	6.12872e-30
Myo10	1.2452	2.23869e-30	3.70145e-26
Nrg4	1.24642	1.20727e-36	1.9961e-32
Xbp1	1.25257	7.08597e-30	1.17159e-25
Bcl3	1.2547	1.59658e-31	2.63979e-27
Dusp1	1.26376	4.21979e-33	6.977e-29
Id2	1.26603	4.76623e-30	7.88049e-26
Hivep2	1.28075	1.05516e-34	1.74461e-30
Sh2b2	1.2825	2.33792e-34	3.86552e-30
Plaur	1.28416	1.74663e-35	2.88788e-31
Dram1	1.28959	9.96387e-35	1.64743e-30
Relb	1.30307	1.76322e-34	2.9153e-30
Itga9	1.30452	2.83133e-49	4.68133e-45
Olfr1033	1.31355	9.86849e-33	1.63166e-28
Tigd2	1.31534	3.74831e-37	6.19746e-33
Igsf6	1.32348	5.2337e-34	8.65339e-30
Dock10	1.33648	1.51648e-22	2.50735e-18
Pde4d	1.34	2.81746e-49	4.65839e-45
Mafb	1.3635	3.94137e-29	6.51665e-25
Xdh	1.37966	4.43794e-42	7.3377e-38
Saal1	1.39314	9.84532e-39	1.62782e-34
Hif1a	1.39995	2.98328e-39	4.93256e-35
Lbp	1.40254	3.13778e-48	5.188e-44
Tmem8	1.40374	6.70992e-36	1.10942e-31
Emilin2	1.41231	3.14523e-45	5.20032e-41
Abhd17b	1.43198	2.78243e-36	4.60047e-32
Fn1	1.43286	2.87477e-23	4.75314e-19
Casp4	1.45032	5.12656e-41	8.47625e-37
Il6	1.45661	3.4824e-35	5.75779e-31
Uty	1.47215	2.36544e-46	3.91102e-42
Arhgap26	1.47778	5.4173e-34	8.95696e-30
Gramd1a	1.48513	8.86488e-45	1.46572e-40
Cpne8	1.49146	9.20609e-52	1.52214e-47
Ms4a6d	1.496	2.54299e-46	4.20458e-42
Pla2g7	1.4986	1.9339e-46	3.19751e-42
Il15ra	1.50628	1.55434e-48	2.56995e-44
Icam1	1.52017	1.2063e-33	1.9945e-29
Il1r2	1.53036	6.35098e-34	1.05007e-29
Gm16083	1.53405	8.83208e-48	1.4603e-43
Clec4d	1.53863	5.51672e-54	9.12135e-50
Lyn	1.56574	6.09855e-100	1.00833e-95
Pfkfb3	1.5704	9.01406e-49	1.49039e-44
Rab31	1.60261	1.35942e-70	2.24767e-66
Pik3r5	1.60504	2.76805e-51	4.5767e-47
Sbno2	1.60996	3.88726e-52	6.4272e-48
Cers6	1.62509	3.2892e-48	5.43837e-44
Plscr1	1.63729	3.25085e-54	5.37495e-50
Clec4e	1.63732	3.10161e-44	5.1282e-40
Il4ra	1.64199	7.32674e-51	1.2114e-46
Hck	1.64699	2.26347e-52	3.74242e-48
March1	1.70107	8.85321e-78	1.46379e-73
Samsn1	1.76183	1.30899e-59	2.16429e-55
Hif3a	1.77625	4.37879e-65	7.23989e-61
Slc39a14	1.77835	4.4974e-64	7.436e-60
Myo1e	1.79587	3.26363e-53	5.39608e-49
Fam169b	1.79923	9.43981e-49	1.56078e-44
Irak3	1.8088	3.30098e-58	5.45784e-54
Tnfaip3	1.84968	6.54041e-62	1.08139e-57
Rnf169	1.86239	3.47122e-133	5.73931e-129
Cp	1.8648	2.22987e-64	3.68686e-60
Jaml	1.92468	1.64593e-73	2.72138e-69
Cpd	1.92848	7.85329e-75	1.29846e-70
Aoah	1.93743	1.25958e-128	2.08259e-124
Kiz	1.94417	1.01147e-65	1.67237e-61
Ikbke	1.95067	1.16192e-72	1.92113e-68
Abtb2	1.95775	8.45377e-66	1.39775e-61
Dst	1.96077	4.2679e-54	7.05655e-50
Socs3	1.96082	4.752e-71	7.85696e-67
Cd163	1.97444	2.29588e-27	3.796e-23
Wnk1	2.00157	7.32083e-117	1.21043e-112
Ccl6	2.02441	9.59461e-59	1.58637e-54
Cxcl1	2.04717	5.75203e-74	9.51041e-70
Sdc4	2.054	1.46336e-71	2.41953e-67
Msr1	2.05635	1.01174e-100	1.67281e-96
Ier3	2.10494	8.38883e-80	1.38701e-75
Arl15	2.13646	1.11003e-104	1.83532e-100
Cd55	2.17132	1.69595e-84	2.80409e-80
Pde4b	2.18997	1.57547e-100	2.60488e-96
Nfkbia	2.22229	2.13125e-102	3.52381e-98
Birc3	2.23412	4.95163e-93	8.18702e-89
Fpr1	2.25921	4.62254e-87	7.6429e-83
Egfr	2.3429	5.62468e-100	9.29985e-96
Fth1	2.38903	3.35573e-172	5.54836e-168
Sod2	2.40375	3.46263e-111	5.72511e-107
N4bp1	2.40646	7.84872e-116	1.29771e-111
Srgn	2.48309	3.64161e-110	6.02104e-106
Csf3	2.55587	7.99589e-78	1.32204e-73
Fmnl2	2.56247	2.00921e-159	3.32202e-155
Apod	2.58116	2.41443e-133	3.99201e-129
Cd38	2.69241	6.19805e-126	1.02479e-121
Ccl9	2.70514	1.13229e-127	1.87214e-123
Lcn2	2.75822	1.70486e-139	2.81881e-135
Fkbp5	2.79437	1.10074e-143	1.81996e-139
Cacna1d	3.17717	3.10185e-170	5.12859e-166
Ttr	3.60714	5.91172e-154	9.77444e-150
Mt2	3.6474	8.94515e-230	1.47899e-225
Mt1	3.9156	7.94521e-286	1.31366e-281
Cxcl2	4.2548	2.28231e-188	3.77358e-184
Saa3	6.14593	0	0

## Sheet: Resident macrophages, CCL2+
gene	avg_log2FC	p_val	p_val_adj
Hpgd	-3.78304	6.15891e-25	1.01831e-20
Cd180	-3.15304	1.67459e-25	2.76877e-21
Arsb	-2.97977	1.72518e-27	2.85241e-23
Gm26522	-2.95162	3.49647e-27	5.78106e-23
Cd36	-2.87217	1.01695e-16	1.68142e-12
Zfp710	-2.84552	4.45768e-26	7.37033e-22
Mef2c	-2.7667	2.71422e-39	4.48769e-35
Ctsc	-2.73019	7.64852e-29	1.26461e-24
Tcf24	-2.68876	3.7092e-15	6.13279e-11
Samd4	-2.68304	2.7107e-20	4.48187e-16
Rnf150	-2.63079	2.57957e-26	4.26506e-22
Hpgds	-2.626	1.03116e-27	1.70493e-23
Gatm	-2.48782	1.50421e-25	2.48706e-21
Cass4	-2.46302	3.71506e-20	6.14248e-16
Ednrb	-2.4422	5.49363e-19	9.08316e-15
Slc8a1	-2.43677	2.59888e-31	4.29699e-27
Fam107b	-2.41393	8.28317e-14	1.36954e-09
Reps2	-2.30766	6.46429e-17	1.0688e-12
Tbc1d4	-2.30229	1.51469e-25	2.50439e-21
Ehd4	-2.29745	1.67358e-24	2.76709e-20
Mctp1	-2.27932	6.57969e-23	1.08789e-18
P3h2	-2.22719	3.56414e-13	5.89294e-09
Bank1	-2.21102	5.32818e-18	8.80961e-14
Cacna1a	-2.18214	7.97392e-24	1.31841e-19
Ttc28	-2.17931	1.27965e-19	2.11577e-15
Slc40a1	-2.16499	4.33783e-12	7.17217e-08
Abhd12	-2.16139	2.1451e-15	3.54671e-11
Ddx60	-2.1477	6.83778e-14	1.13056e-09
St8sia4	-2.12534	2.99464e-14	4.95134e-10
Tbxas1	-2.10755	6.75672e-16	1.11716e-11
Myo5a	-2.0992	1.94905e-20	3.22255e-16
Stard8	-2.057	3.22208e-15	5.32739e-11
Rgs7bp	-2.0539	4.9413e-12	8.16995e-08
Cmah	-2.0346	1.46538e-13	2.42286e-09
Gpr183	-2.01045	1.06363e-14	1.7586e-10
P2rx7	-2.00379	3.33922e-11	5.52107e-07
Ptpra	-1.98571	9.16331e-16	1.51506e-11
Gas6	-1.97807	3.92074e-15	6.48255e-11
Slc16a7	-1.93002	1.58574e-12	2.62186e-08
Wwp1	-1.91637	2.33211e-23	3.85591e-19
Klhl18	-1.91257	1.43198e-12	2.36763e-08
Nfkbid	-1.91129	2.15219e-16	3.55844e-12
Myo1f	-1.89257	8.31593e-13	1.37496e-08
Tnfrsf11a	-1.84788	5.6929e-13	9.41265e-09
Pnpla7	-1.84468	7.05864e-14	1.16708e-09
Tln2	-1.84372	3.16231e-13	5.22856e-09
Anapc15	-1.83297	2.2785e-15	3.76726e-11
Camk1	-1.82588	3.62587e-13	5.99501e-09
Ms4a7	-1.81523	4.53801e-13	7.50314e-09
Fosb	-1.80191	9.83465e-09	0.000162606
Abcg3	-1.79158	7.1738e-10	1.18612e-05
Snx29	-1.78537	9.15471e-21	1.51364e-16
Rasgrp3	-1.77811	1.38576e-10	2.29122e-06
Pde7a	-1.77174	1.42826e-11	2.36148e-07
Dab2	-1.74973	1.77357e-35	2.93242e-31
Agmo	-1.73813	1.14134e-13	1.88709e-09
Fcrls	-1.73635	1.97989e-11	3.27354e-07
Rasal2	-1.73317	5.39202e-21	8.91516e-17
Cd209f	-1.73078	5.34258e-07	0.00883342
Ulk2	-1.71136	4.52551e-14	7.48248e-10
Tsix	-1.7112	4.24194e-15	7.01362e-11
Plxna4	-1.70954	9.27864e-09	0.000153413
Gm26532	-1.70925	8.48752e-10	1.40333e-05
Gm31243	-1.6993	1.38582e-08	0.000229131
Osbpl8	-1.69723	2.21662e-16	3.66496e-12
Spats2l	-1.69603	5.1787e-10	8.56246e-06
Cx3cr1	-1.69149	7.73132e-08	0.0012783
Dse	-1.69088	4.58446e-15	7.57994e-11
Ccl24	-1.6822	3.25017e-09	5.37383e-05
Gpr160	-1.67975	9.91951e-10	1.64009e-05
Itga6	-1.63445	3.91134e-09	6.46701e-05
Stab1	-1.6335	2.46915e-22	4.08248e-18
Cryl1	-1.62817	1.76104e-10	2.91171e-06
Plekhg5	-1.62251	3.16504e-10	5.23308e-06
Man1c1	-1.61592	1.21611e-12	2.01072e-08
Park2	-1.60829	3.55409e-12	5.87634e-08
Slc9a9	-1.60481	4.27947e-33	7.07568e-29
Arhgap18	-1.60131	1.28196e-10	2.11959e-06
Xist	-1.60127	7.65463e-23	1.26562e-18
Ly86	-1.59644	4.99888e-09	8.26515e-05
Maf	-1.5959	1.86376e-19	3.08154e-15
Rreb1	-1.57365	1.95042e-20	3.22482e-16
Kctd12	-1.56725	6.6581e-10	1.10085e-05
Colec12	-1.55677	1.74087e-12	2.87835e-08
Snx30	-1.55361	4.89049e-11	8.08594e-07
Ppp1r9a	-1.54448	3.06632e-16	5.06985e-12
Cyp27a1	-1.53959	6.84348e-09	0.00011315
Gm13710	-1.53252	7.2467e-10	1.19817e-05
Fry	-1.52913	7.84786e-11	1.29756e-06
Ssbp2	-1.52247	6.80013e-09	0.000112433
Lyve1	-1.50968	5.40329e-12	8.93381e-08
Il16	-1.50285	1.06406e-10	1.75932e-06
Mbnl1	-1.49682	9.22714e-19	1.52561e-14
Tmcc3	-1.49065	6.59303e-10	1.09009e-05
Arhgef3	-1.47392	1.02535e-12	1.69531e-08
Man2b1	-1.46919	2.24014e-11	3.70384e-07
Nr3c2	-1.46917	1.87031e-07	0.00309237
Arhgap39	-1.46131	1.24477e-08	0.000205811
Wasl	-1.45993	2.14148e-11	3.54072e-07
Smyd3	-1.45547	4.77537e-11	7.8956e-07
Acss1	-1.43453	1.40232e-08	0.000231859
Cd83	-1.43327	2.51824e-08	0.000416365
Tmem57	-1.43066	6.28188e-08	0.00103865
Fcho2	-1.42811	2.85611e-12	4.7223e-08
Arhgap15	-1.42175	1.63941e-08	0.000271061
Sgk3	-1.40561	3.88665e-08	0.000642619
Fgd4	-1.38083	5.57038e-09	9.21006e-05
Neat1	-1.37832	8.92471e-15	1.47561e-10
AC149090.1	-1.37511	4.74674e-13	7.84827e-09
Itgb5	-1.37113	1.5519e-07	0.00256592
Cltc	-1.36482	7.73492e-14	1.27889e-09
Stard9	-1.35955	1.53902e-09	2.54461e-05
Blvrb	-1.35944	2.66321e-08	0.000440335
Rgs10	-1.35103	6.35404e-08	0.00105058
Dgkd	-1.35018	9.9923e-10	1.65213e-05
Wdfy4	-1.34564	4.21555e-08	0.000696999
Nek7	-1.32145	1.80494e-07	0.00298429
Gab3	-1.31738	7.26603e-11	1.20137e-06
Wdr7	-1.31493	1.15044e-07	0.00190214
Hacd4	-1.31267	5.86648e-07	0.00969964
Lrp6	-1.31107	4.16428e-08	0.000688522
Dock8	-1.31022	1.37615e-11	2.27533e-07
Adrb2	-1.30522	3.82828e-07	0.00632967
Bach2	-1.29153	1.89931e-06	0.0314033
Ptprk	-1.2899	3.58065e-10	5.92024e-06
Gm5086	-1.28454	4.48697e-07	0.00741875
Tbc1d16	-1.28385	2.57324e-07	0.0042546
Pip4k2a	-1.27983	1.00556e-10	1.66259e-06
Bcl2	-1.27954	1.3298e-06	0.0219869
Itga4	-1.27612	2.23653e-07	0.00369787
Adcy7	-1.27207	5.66748e-09	9.37062e-05
Rhobtb1	-1.26147	4.22209e-09	6.9808e-05
St6gal1	-1.25862	1.05223e-07	0.00173976
Cenpf	-1.25712	1.88913e-06	0.0312348
Gna12	-1.25541	5.28085e-08	0.000873135
Herc1	-1.2512	1.55426e-10	2.56981e-06
Atp2b1	-1.25008	1.04333e-12	1.72505e-08
Ralgps2	-1.24905	1.09211e-06	0.0180569
Rab40c	-1.24592	2.7068e-07	0.00447542
Trim14	-1.24582	1.13006e-06	0.0186844
Lyl1	-1.24125	7.27756e-07	0.0120327
Zfp951	-1.22938	6.53316e-07	0.0108019
Arhgef6	-1.22338	6.05317e-07	0.0100083
Eps15	-1.22183	2.30738e-08	0.000381502
Dlc1	-1.21711	2.25152e-07	0.00372266
Abca9	-1.2021	2.32391e-09	3.84236e-05
F630028O10Rik	-1.19827	8.23772e-08	0.00136203
Ric8b	-1.19787	2.69342e-06	0.0445329
Sirpa	-1.1974	1.06048e-13	1.75339e-09
Plxnc1	-1.19397	2.62555e-06	0.0434108
Prkca	-1.18187	8.41045e-10	1.39058e-05
Atp5o	-1.1786	8.18889e-12	1.35395e-07
Arid4a	-1.17607	2.40487e-07	0.00397621
Hk3	-1.175	1.95209e-06	0.0322759
Plek	-1.17105	1.54062e-10	2.54725e-06
Mbd5	-1.17082	1.29248e-07	0.00213699
Ptpn18	-1.1665	8.00718e-07	0.0132391
Tgfbr2	-1.16267	2.01906e-10	3.33831e-06
Sfi1	-1.1607	3.88652e-07	0.00642598
Mtss1	-1.1602	1.06938e-10	1.76811e-06
Clta	-1.14932	7.71035e-07	0.0127483
Gm26694	-1.14418	1.59838e-06	0.0264276
Fgd2	-1.13087	3.97611e-07	0.0065741
Foxo3	-1.12737	1.39282e-06	0.0230289
Camk1d	-1.12227	2.39558e-10	3.96086e-06
Slc38a9	-1.11719	1.04869e-07	0.0017339
Dock4	-1.11582	2.51982e-08	0.000416627
Snx24	-1.11359	3.94052e-09	6.51526e-05
Etv5	-1.11339	2.95504e-06	0.0488586
Itsn1	-1.11257	2.02222e-13	3.34353e-09
Ripor2	-1.10866	1.0726e-06	0.0177344
Rasa1	-1.09922	9.33571e-07	0.0154357
Fnip1	-1.08534	8.88388e-08	0.00146886
Fnbp1	-1.07538	8.20598e-09	0.000135678
Dclre1c	-1.07215	3.34022e-09	5.52273e-05
Ssh2	-1.06915	4.88533e-10	8.0774e-06
Elk3	-1.06371	1.90853e-07	0.00315556
Iqgap2	-1.05377	3.30267e-07	0.00546063
Ubac2	-1.0531	2.43978e-06	0.0403394
Vps13c	-1.05051	5.22152e-07	0.00863326
Fam105a	-1.0314	2.2916e-06	0.0378894
Osbpl11	-1.0288	3.60717e-07	0.0059641
Arhgap45	-1.02715	7.46671e-10	1.23455e-05
Prkg1	-1.02706	1.76859e-06	0.0292419
Fli1	-1.02293	6.40137e-10	1.0584e-05
Taok3	-1.01558	9.86291e-07	0.0163073
Ldlrad4	-1.0145	7.76856e-08	0.00128445
Mitf	-1.00725	2.30041e-07	0.0038035
Snx2	-1.00247	5.55765e-08	0.000918901
Creb5	1.0016	9.68178e-07	0.0160079
Rnd3	1.0039	5.4222e-07	0.00896506
Trpm3	1.0069	5.01133e-08	0.000828574
Osbpl9	1.02335	2.4654e-06	0.0407629
Hsbp1	1.03943	1.33624e-06	0.0220934
Pde4d	1.04138	2.41665e-06	0.0399568
Tbk1	1.05057	8.86704e-08	0.00146608
Fam169b	1.05332	3.85398e-08	0.000637217
Litaf	1.05394	1.19768e-06	0.0198024
Bcl3	1.05562	9.15803e-07	0.0151419
Pou2f2	1.05756	8.95038e-07	0.0147986
Adam9	1.06341	4.96808e-07	0.00821423
Srgn	1.08001	5.81903e-10	9.62118e-06
Zeb2	1.08666	1.36593e-15	2.25843e-11
Cdkn1a	1.09672	2.15953e-06	0.0357057
Stat3	1.10136	9.51976e-10	1.574e-05
Vasp	1.10521	2.25976e-07	0.00373629
Selp	1.11475	5.64301e-07	0.00933015
Klf9	1.12286	2.35025e-06	0.0388591
Adam8	1.12594	9.92265e-09	0.000164061
Lbp	1.13368	3.30256e-09	5.46045e-05
Smim3	1.13939	5.99997e-08	0.000992035
Ptpn1	1.14564	5.84681e-08	0.000966712
Tank	1.16267	5.63843e-08	0.000932257
Ncf1	1.17031	5.34823e-09	8.84276e-05
D530033B14Rik	1.17038	1.46059e-09	2.41494e-05
Txnrd1	1.17122	7.00375e-07	0.01158
Ube2f	1.17131	9.82621e-08	0.00162467
Vmp1	1.17454	3.95425e-08	0.000653796
Riok3	1.17538	8.25714e-07	0.0136524
Gm16083	1.17602	3.22562e-10	5.33324e-06
Mocs1	1.17632	1.22648e-08	0.000202785
Dok3	1.20307	5.8663e-08	0.000969934
Klf7	1.20338	8.80611e-10	1.456e-05
Mcoln2	1.20635	1.38239e-07	0.00228564
Spata13	1.2084	1.97452e-09	3.26468e-05
Mki67	1.21207	1.75964e-07	0.00290938
Csf2rb	1.21944	2.9298e-07	0.00484412
Gm15675	1.23092	1.69465e-10	2.80194e-06
Cd44	1.23319	2.19006e-07	0.00362105
Rffl	1.23548	8.29815e-10	1.37202e-05
Rnf103	1.24572	1.68144e-07	0.00278009
Rab20	1.24814	3.12325e-11	5.16398e-07
Rbpms	1.25537	2.72221e-09	4.5009e-05
Cebpd	1.2626	1.58441e-08	0.000261966
Pabpc1	1.26734	4.56155e-08	0.000754206
Fpr3	1.26983	1.26097e-09	2.08489e-05
Tax1bp1	1.27054	2.19585e-07	0.00363062
Tma16	1.27365	1.23628e-08	0.000204406
Junb	1.2766	6.70851e-09	0.000110919
Relb	1.28212	5.67742e-08	0.000938705
Rbm26	1.28381	1.44248e-10	2.385e-06
Wdr43	1.30803	2.14899e-06	0.0355313
Fyb	1.31324	1.2107e-10	2.00177e-06
Rnf149	1.31527	8.14853e-08	0.00134728
Diaph2	1.32004	3.30635e-18	5.46672e-14
1600014C10Rik	1.32085	1.24983e-09	2.06647e-05
Cd47	1.32514	6.14621e-08	0.00101621
Pstpip2	1.32809	1.06551e-11	1.76172e-07
Dusp16	1.33215	2.4414e-09	4.0366e-05
Slfn2	1.34356	1.72683e-08	0.000285513
Lrrc25	1.34454	2.54747e-09	4.21198e-05
Pgs1	1.34658	3.51004e-10	5.8035e-06
Ms4a4a	1.35435	9.18531e-07	0.015187
Ms4a6d	1.3572	1.14217e-09	1.88846e-05
Sash1	1.35872	8.02911e-14	1.32753e-09
Aff1	1.36384	1.08739e-07	0.00179789
Jaml	1.36413	2.88944e-08	0.000477739
Arid5b	1.37128	9.69256e-07	0.0160257
Nrg4	1.3744	3.18937e-10	5.2733e-06
Trps1	1.3869	1.34365e-13	2.22159e-09
Mrpl52	1.38737	8.89693e-10	1.47102e-05
Dst	1.38965	1.07469e-06	0.0177689
Samsn1	1.39306	8.49378e-12	1.40436e-07
Cpne8	1.40455	1.40764e-08	0.000232738
Cebpb	1.40548	5.90354e-12	9.76092e-08
Stk40	1.40933	3.2126e-07	0.00531172
Man2a1	1.41972	3.00938e-10	4.97571e-06
Etv6	1.42122	1.11896e-14	1.85008e-10
Pid1	1.43939	2.65012e-09	4.3817e-05
Rab31	1.44122	1.11475e-11	1.84312e-07
Plaur	1.45331	1.62858e-11	2.69269e-07
Sh2b2	1.48871	8.23676e-09	0.000136187
Alpk1	1.48923	1.19141e-07	0.00196987
Tigd2	1.49231	3.77052e-08	0.000623417
Hk2	1.50093	2.02481e-08	0.000334783
Pvt1	1.50235	5.94895e-09	9.83599e-05
Ifitm3	1.50368	6.43658e-12	1.06422e-07
Lyn	1.50688	5.59278e-21	9.2471e-17
St3gal1	1.51501	1.17688e-09	1.94585e-05
Ifitm1	1.53221	1.26323e-11	2.08862e-07
Ehd1	1.53228	3.44727e-14	5.69972e-10
Tnip1	1.53754	1.74148e-13	2.87937e-09
Fas	1.53756	4.45961e-08	0.000737352
Prss16	1.53905	7.17987e-14	1.18712e-09
Gramd1a	1.54548	7.92415e-11	1.31018e-06
Xdh	1.5485	3.80987e-13	6.29924e-09
Ankrd33b	1.54906	6.75882e-13	1.1175e-08
Plscr1	1.56102	7.97497e-14	1.31858e-09
Nadk	1.56183	1.10875e-12	1.83321e-08
Casp4	1.56234	5.72423e-09	9.46444e-05
Rhoq	1.56469	4.01203e-12	6.63349e-08
Itga9	1.565	2.83048e-13	4.67992e-09
Id2	1.58584	1.0418e-08	0.000172252
Arhgap26	1.60516	1.27513e-08	0.000210829
Clec4d	1.61499	5.15601e-11	8.52495e-07
Lcp2	1.61969	2.9432e-12	4.86628e-08
Jdp2	1.62512	3.18642e-09	5.26843e-05
Emilin2	1.62737	3.25756e-10	5.38605e-06
Olfr1033	1.63535	4.66322e-13	7.71017e-09
Ccl6	1.64762	1.99518e-10	3.29883e-06
Hif3a	1.65621	1.50549e-14	2.48918e-10
Dram1	1.66982	2.67455e-13	4.4221e-09
Cp	1.67072	1.62173e-14	2.68137e-10
Il15ra	1.68258	9.50108e-13	1.57091e-08
Wnk1	1.69751	7.10982e-10	1.17554e-05
Il1b	1.72259	2.32505e-10	3.84423e-06
Uty	1.72491	7.17987e-14	1.18712e-09
Igsf6	1.73409	4.52008e-12	7.4735e-08
Pfkfb3	1.74741	2.24062e-11	3.70464e-07
Pla2g7	1.74933	1.17679e-12	1.94571e-08
Slc39a14	1.76547	1.39922e-16	2.31348e-12
Sbno2	1.77578	1.51097e-14	2.49823e-10
Gsap	1.7775	2.01718e-12	3.3352e-08
Rnf169	1.79163	9.06289e-18	1.49846e-13
Icam1	1.80254	1.74075e-14	2.87815e-10
Kiz	1.81967	6.87979e-15	1.13751e-10
Myo1e	1.83347	4.77093e-13	7.88825e-09
Socs3	1.88754	4.34209e-19	7.17921e-15
Cers6	1.90338	3.48897e-13	5.76866e-09
Fn1	1.94204	8.32927e-09	0.000137716
Arl15	2.01225	3.56951e-19	5.90183e-15
Lpcat2	2.05364	4.86624e-17	8.04584e-13
Hck	2.06467	8.73697e-20	1.44457e-15
Nfkb1	2.13092	4.41007e-22	7.2916e-18
Ikbke	2.14012	7.10543e-21	1.17481e-16
Saal1	2.14791	1.45725e-23	2.40942e-19
Ier3	2.15419	3.83571e-22	6.34196e-18
Clec4e	2.1703	1.37844e-16	2.27911e-12
Il6	2.20547	9.76616e-17	1.61474e-12
Cd55	2.22566	2.09351e-21	3.4614e-17
Apod	2.26429	2.0853e-24	3.44784e-20
Aoah	2.27311	3.96222e-37	6.55114e-33
Il1a	2.28658	5.64892e-15	9.33992e-11
March1	2.29266	5.15673e-23	8.52615e-19
Fpr1	2.29589	5.57695e-22	9.22092e-18
Cacna1d	2.34916	2.05645e-22	3.40014e-18
Tnfaip3	2.35956	7.04037e-22	1.16405e-17
Irak3	2.38895	6.34459e-26	1.04901e-21
Sdc4	2.43053	3.56516e-23	5.89463e-19
Cpd	2.45715	3.51868e-24	5.81779e-20
Cxcl1	2.47195	7.32771e-23	1.21156e-18
Pik3r5	2.47763	3.23061e-23	5.34149e-19
Lcn2	2.48762	1.00352e-27	1.65923e-23
Cd38	2.50203	1.96586e-26	3.25035e-22
Ccl9	2.51756	4.7986e-25	7.934e-21
Fkbp5	2.57414	4.69982e-27	7.77068e-23
Abtb2	2.59915	4.61541e-26	7.63112e-22
Egfr	2.62349	9.41307e-24	1.55636e-19
Fmnl2	2.6694	1.13869e-29	1.88271e-25
Nfkbia	2.67553	8.39354e-33	1.38779e-28
Sod2	2.7155	3.32552e-32	5.49842e-28
Msr1	2.76054	1.05111e-34	1.73791e-30
Fth1	2.80674	1.94633e-34	3.21805e-30
Birc3	2.93841	8.81368e-37	1.45725e-32
Cd163	2.96373	1.5491e-14	2.56127e-10
Ttr	3.1038	2.22857e-33	3.68473e-29
N4bp1	3.17497	1.15136e-36	1.90365e-32
Csf3	3.20739	3.28351e-31	5.42896e-27
Pde4b	3.22546	6.67734e-40	1.10403e-35
Mt2	3.68906	2.68082e-50	4.43247e-46
Mt1	4.15949	6.8606e-60	1.13433e-55
Cxcl2	4.8909	1.02497e-57	1.69468e-53
Saa3	6.51024	3.0149e-72	4.98483e-68
